# Supplementary material
Source: PubMed Central journal article supplement (PMC3115596)

# Supporting Information

## Formal Synthesis of Leustroducsin B via Reformatsky/Claisen Condensation of Silyl Glyoxylates

Stephen N. Greszler, Justin T. Malinowski, and Jeffrey S. Johnson\*

*Department of Chemistry, University of North Carolina at Chapel Hill, Chapel Hill, North Carolina 27599-3290*

[jsj@unc.edu](mailto:jsj@unc.edu)

### Table of Contents

|                                                           |     |
|-----------------------------------------------------------|-----|
| General Methods and Materials                             | S2  |
| Preparation of Enantioenriched $\beta$ -Lactone <b>S1</b> | S3  |
| Preparation of Reformatsky Reagent <b>S2</b>              | S4  |
| Optimization of Reformatsky/Claisen Cascade               | S4  |
| Experimental Procedures                                   | S5  |
| $^1\text{H}$ , $^{13}\text{C}$ NMR Spectra                | S22 |

**Methods: General.** Infrared (IR) spectra were obtained using a Jasco 460 Plus Fourier transform infrared spectrometer. Proton and carbon magnetic resonance spectra ( $^1\text{H}$  NMR and  $^{13}\text{C}$  NMR) were recorded on a Bruker model Avance 400 ( $^1\text{H}$  NMR at 400 MHz and  $^{13}\text{C}$  at 100 MHz) or a Bruker model Avance 500 ( $^1\text{H}$  NMR at 500 MHz and  $^{13}\text{C}$  NMR at 125 MHz) spectrometer with solvent resonance as the internal standard ( $^1\text{H}$  NMR:  $\text{CDCl}_3$  at 7.26 ppm;  $^{13}\text{C}$  NMR:  $\text{CDCl}_3$  at 77.0 ppm).  $^1\text{H}$  NMR data are reported as follows: chemical shift, multiplicity (s = singlet, br s = broad singlet, d = doublet, t = triplet, br t = broad triplet, q = quartet, m = multiplet), coupling constants (Hz), and integration. Mass spectra were obtained using a Bruker BioTOF II spectrometer with electrospray ionization calibrated with CsOAc. All samples were prepared in methanol. Analytical thin layer chromatography (TLC) was performed on Sorbent Technologies 0.20 mm Silica G TLC plates. Visualization was accomplished with UV light and/or aqueous ceric ammonium nitrate solution followed by heating. Purification of the reaction products was carried out by flash chromatography using Siliaflash-P60 silica gel (40-63 $\mu\text{m}$ ) purchased from Silicycle. Purification via HPLC was performed on a Varian Prepstar SD-1 Solvent Delivery System equipped with a Cyano 60 Å 6 $\mu\text{m}$  column from Berger Instruments. Specific parameters used in the separation of compounds are detailed under applicable entries. Unless otherwise noted, all reactions were carried out under an atmosphere of dry nitrogen in oven-dried glassware with magnetic stirring. Yield refers to isolated yield of analytically pure material unless otherwise noted. Yields are reported for a specific experiment and as a result may differ slightly from those found in the tables, which are averages of at least two experiments

**Materials: General.** Tetrahydrofuran, diethyl ether, dichloromethane, and toluene were dried by passage through a column of neutral alumina under nitrogen prior to use. Zinc metal was washed with 1 M HCl, water, acetone, and diethyl ether and then dried under vacuum at 60 °C for 16 h prior to storage in a nitrogen-filled glove box. Lithium chloride was dried and stored in a 100 °C oven. Diisopropylethylamine and triethylamine were freshly distilled from calcium hydride prior to use.

All other reagents were purchased from commercial sources and were used as received unless otherwise noted.

## Preparation of S1:

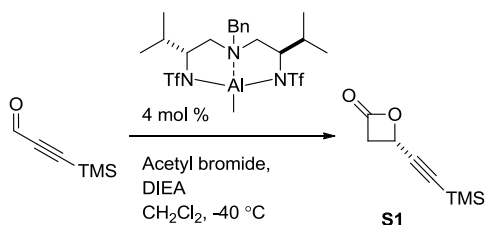

### (S)-4-((trimethylsilyl)ethynyl)oxetan-2-one (S1):

The title compound was prepared according to the procedure described by Nelson<sup>1</sup> with the following modifications:

1. Instead of purification via Kugelrohr distillation, the crude  $\beta$ -lactone was purified via flash chromatography (92.5:7.5 to 85:15 hexanes:ethyl acetate), affording the title compound (67% yield) as a light yellow oil whose spectral properties matched those reported in the literature.<sup>1</sup>

2. The enantiomeric excess of the prepared lactone was assayed via supercritical fluid chromatographic (SFC) analysis of the corresponding  $\beta$ -hydroxyketone **1a** (*vide infra*). Enantiomeric excesses ranged from 78-83% using this method. CSP-SFC analysis of a sample of **1a** showed that the product was enriched to 78% ee (Chiralpak OD column, 3.0% MeOH, 1.0 mL/min, 150 psi, 24 °C, 210 nm,  $t_r$ -major enantiomer: 12.9 min,  $t_r$ -minor enantiomer: 25.9 min; CSP-SFC traces for a mixture of enantiomers and of the enantioenriched product are attached below:

Enantiomeric Mixture:

Enantioenriched Sample:

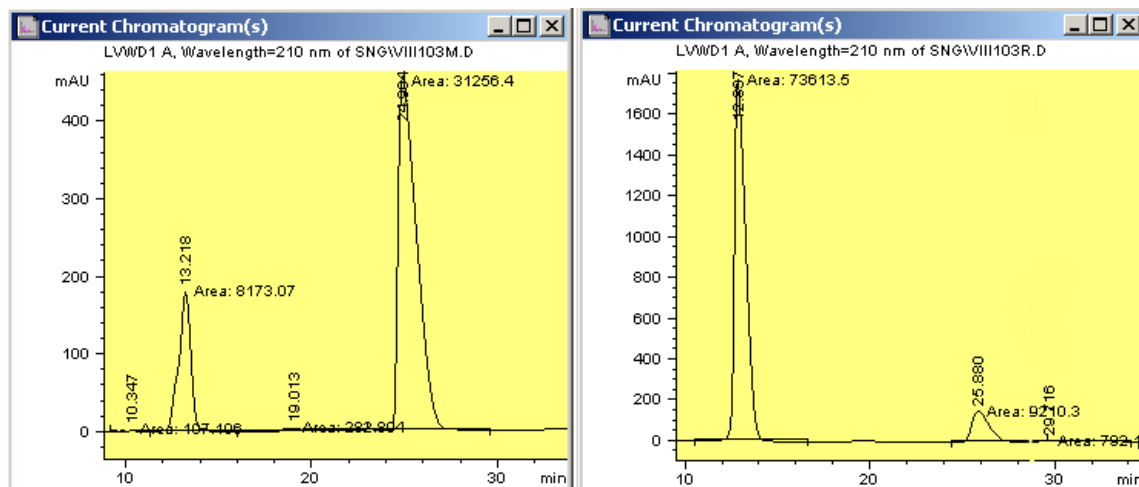

<sup>1</sup> Nelson, S. G., Peelen, T. J., Wan, Z. *J. Am. Chem. Soc.* **1999**, *121*, 9742-9743.

## Preparation of Reformatsky Reagent (S2):

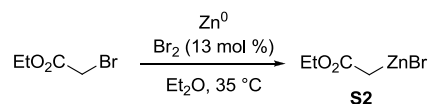

An oven-dried 100-mL round-bottomed flask equipped with a magnetic stir bar was charged with zinc dust (1.41 g, 21.6 mmol, 2 equiv) and diethyl ether (25 mL). The flask was fitted with a condenser and purged with nitrogen. Br<sub>2</sub> (0.07 mL, 1.4 mmol, 0.13 equiv) was added dropwise over 5 min with stirring (exotherm observed). The suspension was heated to reflux, and ethyl bromoacetate (1.2 mL, 10.8 mmol, 1.0 equiv) was added dropwise over 15 min. The solution was stirred at this temperature for 4 h then cooled to RT. An aliquot was titrated with I<sub>2</sub>, typically reflecting concentrations of active reagent of 0.35-0.43 M (81-100% yield). The solution was stored under nitrogen at 0 °C for up to one week and titrated immediately prior to each subsequent use.

**Table S-1. Optimization of Reformatsky/Claisen Cascade:**

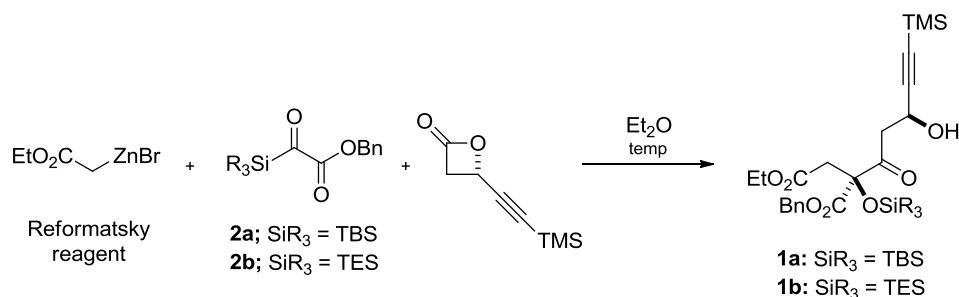

| Entry | SiR <sub>3</sub> | activation method              | equiv Reformatsky reagent | equiv lactone | temp (°C) | yield (%) <sup>a,b,c</sup> |
|-------|------------------|--------------------------------|---------------------------|---------------|-----------|----------------------------|
| 1     | TBS              | 5 mol % TMSCl                  | 1.5                       | 2.0           | -20 to 0  | 43                         |
| 2     | TBS              | 5 mol % TMSCl                  | 1.5                       | 3.0           | -20 to 0  | 51                         |
| 3     | TBS              | 5 mol % TMSCl + 2.0 equiv LiCl | 1.5                       | 3.0           | -20 to rt | 54                         |
| 4     | TBS              | 5 mol % TMSCl                  | 1.5                       | 2.5           | -20 to rt | 68                         |
| 5     | TBS              | 5 mol % TMSCl                  | 1.5                       | 1.5           | -20 to rt | 63                         |
| 6     | TBS              | 5 mol % TMSCl                  | 2.3                       | 1.5           | -20 to rt | 56                         |
| 7     | TES              | 5 mol % TMSCl                  | 1.5                       | 1.4           | -30 to rt | 50                         |
| 8     | TES              | 5 mol % TMSCl                  | 1.8                       | 1.6           | -30 to rt | 66                         |
| 9     | TES              | 5 mol % TMSCl                  | 2.3                       | 1.6           | -30 to rt | 62                         |
| 10    | TES              | 25 mol % Br <sub>2</sub>       | 2.3                       | 1.6           | -30 to rt | 48                         |
| 11    | TES              | 25 mol % Br <sub>2</sub>       | 2.3                       | 1.6           | -30 to 0  | 61                         |
| 12    | TBS              | 25 mol % Br <sub>2</sub>       | 2.3                       | 1.6           | -30 to 0  | 57                         |
| 13    | TBS              | 25 mol % Br <sub>2</sub>       | 1.6                       | 1.6           | -30 to 0  | 56                         |
| 14    | TBS              | 25 mol % Br <sub>2</sub>       | 1.1                       | 1.6           | -30 to 0  | 23                         |

<sup>a</sup> All reactions: yields determined by <sup>1</sup>H NMR analysis using an internal standard. <sup>b</sup> Diastereomeric ratios were all >20:1. <sup>c</sup> Relative stereochemistry was determined by NOESY analysis.<sup>2</sup>

<sup>2</sup> Greszler, S. N.; Malinowski, J. T.; Johnson, J. S. *J. Am. Chem. Soc.* **2010**, *132*, 17393.

## Experimental Procedures:

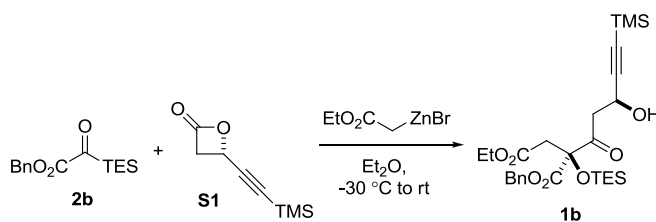

**(S)-1-benzyl-4-ethyl-2-((S)-3-hydroxy-5-(trimethylsilyl)pent-4-ynoyl)-2-((triethylsilyl)oxy)succinate (1b):** A solution of Reformatsky reagent (0.34 M, 150 mL) was prepared according to the standard procedure. The Reformatsky reagent solution (120 mL, 40.9 mmol, 2.3 equiv) was diluted with diethyl ether (150 mL), and the solution was cooled to -30 °C in an acetone/dry ice bath (bath temperature, monitored with a thermocouple probe). An oven-dried vial was charged with benzyl triethylsilyl glyoxylate **2b** (4.95 g, 17.8 mmol, 1.0 equiv) and (*S*)-4-((trimethylsilyl)ethynyl)oxetan-2-one (4.8 g, 28.5 mmol, 1.6 equiv) **S1**. The vial was purged with N<sub>2</sub>, and a solution of the silyl glyoxylate and β-lactone in diethyl ether (20 mL) was added dropwise to the Reformatsky reagent solution over 5 min via cannula transfer. Additional diethyl ether (5 mL) was used to rinse the vial. The flask was allowed to warm slowly in the acetone bath (generally over 30 min from -30 °C to 0 °C). Consumption of the silyl glyoxylate was generally observed by TLC analysis between -15 °C and -10 °C. Once the reaction had reached 0 °C, it was then warmed to room temperature for 30 min. Once the reaction was complete as indicated by TLC analysis, it was quenched with saturated ammonium chloride (75 mL) and was stirred until clear layers were observed. The organic layer was removed, and the aqueous layer was extracted with diethyl ether (3 x 30 mL). The combined organic extracts were washed with brine, dried with magnesium sulfate, and concentrated in vacuo. The product was purified via flash chromatography (93.5:7.5 to 70:30 petroleum ether: diethyl ether) to give the desired product as a light yellow oil with > 25:1 diastereomeric ratio<sup>2</sup> (6.57 g, 69%). Analytical data:  $[\alpha]_D^{25.3}$  -5.3 (*c* = 1.25, CHCl<sub>3</sub>); <sup>1</sup>H NMR (500 MHz, CDCl<sub>3</sub>): δ 7.36-7.31 (m, 5H), 5.17 (d, *J* = 12.0 Hz, 1H), 5.10 (d, *J* = 12.0 Hz, 1H), 4.87 (dd, *J* = 6.5, 4.5 Hz, 1H), 4.09 (q, *J* = 7.5 Hz, 2H), 3.47 (d, *J* = 17 Hz, 1H), 3.36 (dd, *J* = 18.5, 2.5 Hz, 1H), 3.12 (dd, *J* = 18.5, 9.0 Hz, 1H), 2.91 (d, *J* = 17.0 Hz, 2H), 1.22 (t, *J* = 7.0 Hz, 3H), 0.89 (t, *J* = 8.0 Hz, 9H), 0.56 (q, *J* = 8.0 Hz, 6H), 0.56 (s, 9H); <sup>13</sup>C NMR (100 MHz, CDCl<sub>3</sub>): δ 208.8, 169.3, 168.5, 134.4, 128.7, 128.6, 128.5, 104.8, 89.3, 83.7, 68.1, 61.1, 58.8, 46.0, 42.5, 14.0, 6.7, 5.7, -0.2; HRMS (ESI<sup>+</sup>) Calcd. for C<sub>27</sub>H<sub>42</sub>O<sub>7</sub>Si<sub>2</sub>+Cs, 667.1524; Found, 667.1516; IR (thin film, cm<sup>-1</sup>) 3515, 2958, 2911, 2878, 2176, 1738, 1456, 1373, 1343, 1250, 1181, 844, 699; TLC(80:20 Hex:EtOAc): R<sub>f</sub> = 0.42.

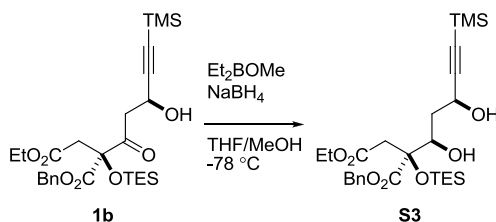

**(S)-1-benzyl 4-ethyl 2-((1R,3S)-1,3-dihydroxy-5-(trimethylsilyl)pent-4-yn-1-yl)-2-((triethylsilyl)oxy)succinate (S3):** A flame-dried and N<sub>2</sub>-purged 500-mL round-bottomed flask

was charged with ketone **1b** (6.0 g, 11.2 mmol, 1.0 equiv). Tetrahydrofuran (200 mL) and methanol (50 mL) were added. The solution was cooled to  $-78\text{ }^{\circ}\text{C}$  (acetone/dry ice), and diethylmethoxyborane (1 M in tetrahydrofuran, 14.6 mL, 14.6 mmol) was added dropwise. After stirring for 45 minutes at  $-78\text{ }^{\circ}\text{C}$ , sodium borohydride (1.27 g, 33.7 mmol, 3.0 equiv) was added in one portion and the reaction was maintained at the same temperature. Once TLC analysis indicated complete consumption of the starting material (3.5 h), the reaction was quenched with acetic acid (9.0 mL). After warming to room temperature, the reaction was stirred for 1.5 h and was then concentrated *in vacuo*. Methanol (30 mL) was added, and the solution was again concentrated *in vacuo*; this procedure was repeated with four additional portions of methanol (30 mL). The residue was dissolved in ethyl acetate and saturated sodium bicarbonate, and the organic layer was washed with saturated sodium bicarbonate, water, and brine. The organic extracts were dried with magnesium sulfate and concentrated *in vacuo* to give a light yellow viscous oil (5.7 g, 95%) that was used without additional purification. Analytical data:  $[\alpha]_{\text{D}}^{25.2} -1.7$  ( $c = 1.25$ ,  $\text{CHCl}_3$ );  $^1\text{H NMR}$  (500 MHz,  $\text{CDCl}_3$ ):  $\delta$  7.36-7.33 (m, 5H), 5.20 (s, 2H), 4.60 (br. s., 1H), 4.10-3.99 (m, 3H), 3.05 (d,  $J = 6.0$  Hz, 1H), 2.87 (d,  $J = 4.0$  Hz, 1H), 2.83 (d,  $J = 9.0$  Hz, 2H), 1.98 (dd,  $J = 13.5, 5.5$  Hz, 1H), (dd,  $J = 10.5, 2.5$  Hz, 1H), 1.21 (t,  $J = 7.0$  Hz, 3H), 0.91 (t,  $J = 8.0$  Hz, 9H), 0.67-0.62 (m, 6H), 0.15 (s, 9H);  $^{13}\text{C NMR}$  (100 MHz,  $\text{CDCl}_3$ ):  $\delta$  172.1, 169.9, 135.0, 128.6, 128.5, 128.4, 105.6, 89.7, 80.6, 75.3, 67.6, 62.1, 60.9, 41.2, 38.7, 14.0, 7.1, 6.4, -0.2; **HRMS (ESI<sup>+</sup>)** Calcd. for  $\text{C}_{27}\text{H}_{44}\text{O}_7\text{Si}_2 + \text{Cs}$ , 669.1681; Found, 669.1710; **IR** (thin film,  $\text{cm}^{-1}$ ) 3470, 2957, 2876, 2172, 1740, 1185, 1022, 844, 734; **TLC**(80:20 Hex:EtOAc):  $R_f = 0.21$ .

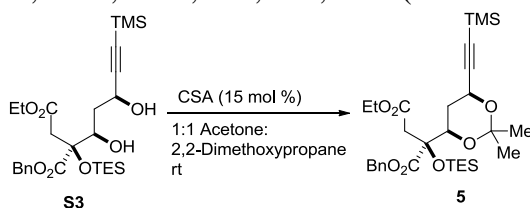

**(S)-1-benzyl-4-ethyl-2-((4R,6S)-2,2-dimethyl-6-((trimethylsilyl)ethynyl)-1,3-dioxan-4-yl)-2-((triethylsilyloxy) succinate (5)** A 500-mL round-bottomed flask was charged with diol **S3** (11.0 g, 20.6 mmol, 1.0 equiv), acetone (250 mL) and 2,2-dimethoxypropane (250 mL). CSA (0.716 g, 3.09 mmol, 0.15 equiv) was added, and the reaction was allowed to stir at room temperature for 16 h. The reaction was quenched by the addition of 0.5 mL of triethylamine and was concentrated *in vacuo*. The residue was purified via column chromatography (90:10 hexanes: ethyl acetate) to give the product as a white solid (8.6 g, 73%). Analytical data:  $[\alpha]_{\text{D}}^{25.4} -14.0$  ( $c = 1.5$ ,  $\text{CHCl}_3$ ); mp  $75\text{--}79\text{ }^{\circ}\text{C}$ ;  $^1\text{H NMR}$  (500 MHz,  $\text{CDCl}_3$ ):  $\delta$  7.35-7.33 (m, 5H), 5.30 (d,  $J = 12.5$  Hz, 1H), 5.05 (d,  $J = 12.0$  Hz, 1H), 4.62 (dd,  $J = 12.0, 2.5$  Hz, 1H), 4.12-4.06 (m, 3H), 2.74 (d,  $J = 14.5$  Hz, 1H), 2.65 (d,  $J = 14.0$  Hz, 1H), 1.88-1.60 (m, 2H), 1.33 (s, 3H), 1.23 (t,  $J = 7.5$  Hz, 3H), 1.19 (s, 3H), 0.95 (t,  $J = 16.0$  Hz, 9H), 0.74-0.65 (m, 6H), 0.17 (s, 9H);  $^{13}\text{C NMR}$  (100 MHz,  $\text{CDCl}_3$ ):  $\delta$  171.6, 169.4, 135.6, 128.7, 128.4, 128.3, 103.7, 99.6, 89.4, 80.2, 72.9, 67.0, 60.7, 60.5, 41.9, 30.8, 29.5, 18.8, 14.0, 7.3, 6.7, -0.21; **HRMS (ESI<sup>+</sup>)** Calcd. for  $\text{C}_{30}\text{H}_{48}\text{O}_7\text{Si}_2 + \text{Na}$ , 599.2837; Found, 599.2809; **IR** (thin film,  $\text{cm}^{-1}$ ) 2956, 2875, 2181, 1739, 1457, 1379, 1251, 1163, 844, 734; **TLC**(80:20 Hex:EtOAc):  $R_f = 0.30$ .

**Table S-2.** Screen of Hydride Sources for Reduction of **5'** and **5**

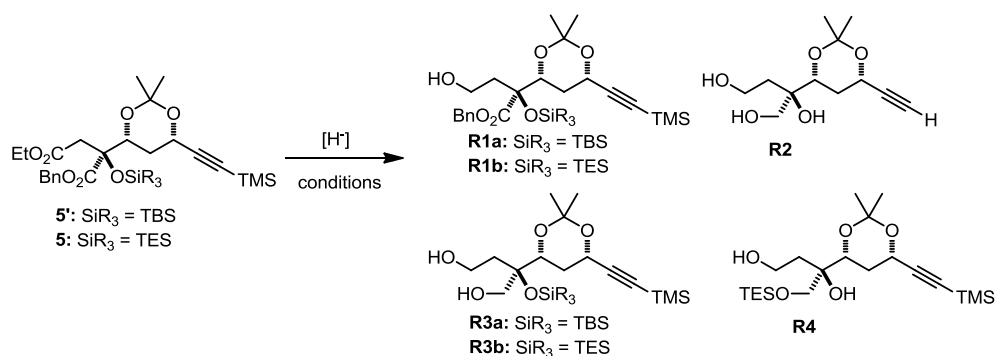

| Entry | acetonide | reducing agent                  | Solvent                                   | temp (°C)  | Result                                        |
|-------|-----------|---------------------------------|-------------------------------------------|------------|-----------------------------------------------|
| 1     | <b>5'</b> | LiAlH <sub>4</sub> (4.0 equiv)  | Et <sub>2</sub> O                         | 35         | <b>R2</b> , 73% yield                         |
| 2     | <b>5'</b> | DIBAL-H (5.0 equiv)             | THF                                       | -78 to rt  | <b>R1a</b> , 89% yield                        |
| 3     | <b>5'</b> | DIBAL-H (5.0 equiv)             | CH <sub>2</sub> Cl <sub>2</sub>           | -10 to rt  | <b>R1a</b>                                    |
| 4     | <b>5'</b> | LiBHEt <sub>3</sub> (7.0 equiv) | THF                                       | Rt         | Mess                                          |
| 5     | <b>5'</b> | LiBHEt <sub>3</sub> (7.0 equiv) | THF                                       | -10        | <b>R1a</b>                                    |
| 6     | <b>5'</b> | LiBHEt <sub>3</sub> (7.0 equiv) | 9:1 Et <sub>2</sub> O:THF                 | -10        | 1:1 <b>R1a</b> : <b>R3a</b>                   |
| 7     | <b>5'</b> | LiBHEt <sub>3</sub> (7.0 equiv) | 15:1 Et <sub>2</sub> O:THF                | -10 to 0   | <b>R3a</b> , 58% yield                        |
| 8     | <b>5'</b> | LiBHEt <sub>3</sub> (7.0 equiv) | 12:1 CH <sub>2</sub> Cl <sub>2</sub> :THF | -50 to rt  | <b>R3a</b> , 75% yield                        |
| 9     | <b>5</b>  | DIBAL-H (5.0 equiv)             | CH <sub>2</sub> Cl <sub>2</sub>           | -10 to rt  | <b>R1b</b>                                    |
| 10    | <b>5</b>  | LiBHEt <sub>3</sub> (7.0 equiv) | THF                                       | -30 to 0   | <b>R1b</b>                                    |
| 11    | <b>5</b>  | LiBHEt <sub>3</sub> (7.0 equiv) | 10:1 toluene:THF                          | -30 to rt  | 1:1 <b>R3b</b> : <b>R4</b>                    |
| 12    | <b>5</b>  | LiBHEt <sub>3</sub> (7.0 equiv) | 10:1 Et <sub>2</sub> O:THF                | -50 to rt  | 1:1 <b>R3b</b> : <b>R4</b>                    |
| 13    | <b>5</b>  | LiBHEt <sub>3</sub> (5.0 equiv) | 10:1 Et <sub>2</sub> O:THF                | -30 to rt  | 1:1 <b>R3b</b> : <b>R4</b>                    |
| 14    | <b>5</b>  | LiBHEt <sub>3</sub> (7.0 equiv) | 10:1 CH <sub>2</sub> Cl <sub>2</sub> :THF | -30 to 0   | <b>R3b</b> , 73% (40 mg scale)                |
| 15    | <b>5</b>  | LiBHEt <sub>3</sub> (7.0 equiv) | 10:1 CH <sub>2</sub> Cl <sub>2</sub> :THF | -30 to -10 | 1:1 <b>R3b</b> : <b>R4</b>                    |
| 16    | <b>5</b>  | LiBHEt <sub>3</sub> (7.0 equiv) | 10:1 CH <sub>2</sub> Cl <sub>2</sub> :THF | -30 to -20 | <b>R3b</b> , 60%; <b>R1b</b> , 12% (1g scale) |
| 17    | <b>5</b>  | LiBHEt <sub>3</sub> (7.0 equiv) | 12:1 CH <sub>2</sub> Cl <sub>2</sub> :THF | -20        | <b>R3b</b> , 52% yield                        |

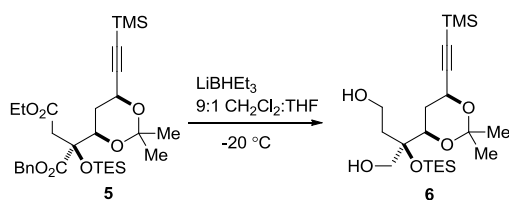

**(R)-2-((4R,6S)-2,2-dimethyl-6-((trimethylsilyl)ethynyl)-1,3-dioxan-4-yl)-2-((triethylsilyl)oxy)butane-1,4-diol (**6**):** A flame-dried and cooled 1L round-bottomed flask was charged with acetonide **5** (5.0 g, 8.7 mmol, 1.0 equiv). The flask was purged with N<sub>2</sub>, and CH<sub>2</sub>Cl<sub>2</sub> (500 mL) was added. The solution was cooled to -30 °C, and lithium triethylborohydride (1M in THF, 57 mmol, 57 mL) was added dropwise over 15 min via syringe pump. The reaction temperature was maintained for 2 h, at which point the temperature was increased to -20 °C for 1 h. The reaction was quenched by the dropwise addition of HOAc (8 mL) and MeOH (30 mL). The resulting suspension was warmed to room temperature and concentrated *in vacuo*, keeping the bath temperature at or below 30 °C to avoid migration of the triethylsilyl group. The residue was redissolved in MeOH (30 mL) and concentrated *in vacuo* an additional four times. The residue

was partitioned between ethyl acetate and saturated aqueous sodium bicarbonate, and the organic extracts were washed successively with saturated sodium bicarbonate (x2), water, and brine. The combined organic extracts were dried with sodium sulfate and concentrated *in vacuo*. The resulting crude oil was purified via column chromatography, eluting with a gradient of 80:20 to 70:30 hexanes:ethyl acetate to give the desired diol as a white solid (2.1 g, 56%). Analytical data:  $[\alpha]_D^{25.2}$  -2.8 ( $c = 1.8$ ,  $\text{CHCl}_3$ ); mp 93-95 °C;  $^1\text{H NMR}$  (500 MHz,  $\text{CDCl}_3$ ):  $\delta$  4.67 (dd,  $J = 11.5, 2.5$  Hz, 1H), 3.93 (dd,  $J = 11.5, 2.5$  Hz, 1H), 3.86-3.73 (m, 3H), 3.50 (dd,  $J = 11.0, 3.0$  Hz, 1H), 2.83 (s, 1H), 2.65 (s, 1H), 1.98-1.70 (m, 4H), 1.46 (s, 6H), 0.95 (t,  $J = 3.5$  Hz, 9H), 0.74-0.65 (dq,  $J = 16.0, 3.0$  Hz 6H), 0.17 (s, 9H);  $^{13}\text{C NMR}$  (100 MHz,  $\text{CDCl}_3$ ):  $\delta$  103.7, 99.6, 89.6, 78.0, 73.2, 65.6, 60.9, 58.3, 37.7, 31.3, 29.9, 19.2, 7.1, 6.8, -0.2; **HRMS (ESI<sup>+</sup>)** Calcd. for  $\text{C}_{21}\text{H}_{42}\text{O}_5\text{Si}_2+\text{Na}$ , 453.2469; Found, 453.2464; **IR** (thin film,  $\text{cm}^{-1}$ ) 3389, 2956, 2876, 2183, 1739, 1460, 1380, 1250, 1161, 1055, 844, 733; **TLC**(75:25 Hex:EtOAc):  $R_f = 0.09$ .

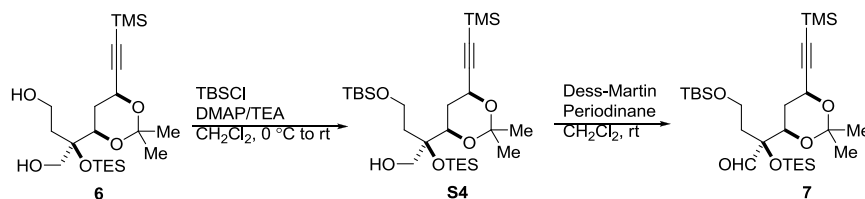

**(S)-4-((tert-butyldimethylsilyloxy)-2-((4R,6S)-2,2-dimethyl-6-((trimethylsilyl)ethynyl)-1,3-dioxan-4-yl)-2-((triethylsilyloxy)butanal (7):** A 100-mL oven-dried round bottomed flask was charged with diol **6** (0.840 g, 1.95 mmol, 1.0 equiv) and  $\text{CH}_2\text{Cl}_2$  (60 mL). The solution was cooled to 0 °C, and triethylamine (0.540 mL, 3.9 mmol, 2.0 equiv), *tert*-butyldimethylsilyl chloride (0.339 g, 2.25 mmol, 1.15 equiv), and DMAP (0.071 g, 0.585 mmol, 0.3 equiv) were added successively. The reaction was allowed to warm slowly to room temperature over 1 h. Once TLC analysis indicated complete consumption of the starting material (5 h), the reaction was quenched by the addition of 5 mL of saturated aqueous sodium bicarbonate. The organic layer was washed with saturated  $\text{NaHCO}_3$ , water, and brine and was then dried with sodium sulfate. After concentration *in vacuo*, the resulting oil was used without further purification:

The unpurified oil was dissolved in dry  $\text{CH}_2\text{Cl}_2$  (30 mL) in an oven-dried 250-mL round-bottomed flask, and Dess-Martin Periodinane (1.32 g, 3.12 mmol, 1.6 equiv) was added in one portion at room temperature. The reaction was stirred at the same temperature under an  $\text{N}_2$  atmosphere. Once TLC analysis indicated complete consumption of the monoalcohol (1.5 h), the reaction was diluted with diethyl ether (30 mL). Saturated aqueous sodium bicarbonate (20 mL) and saturated aqueous sodium thiosulfate (20 mL) were added, and biphasic mixture was stirred vigorously for 15 minutes. After partitioning the layers, the aqueous layer was extracted with diethyl ether (3x10 mL), and the combined organic extracts were washed with water and brine and dried with sodium sulfate. The combined extracts were concentrated *in vacuo* to give an oil that was purified via column chromatography (95:5 hexanes: ethyl acetate) to give the desired product **7** as a colorless oil (0.880 g, 83% over two steps).

**Mono alcohol S4:** Analytical data:  $[\alpha]_D^{25.6}$  -7.1 ( $c = 2.15$ ,  $\text{CHCl}_3$ );  $^1\text{H NMR}$  (500 MHz,  $\text{CDCl}_3$ ):  $\delta$  4.66 (dd,  $J = 12.0, 3.0$  Hz, 1H), 3.90 (dd,  $J = 12.0, 2.5$  Hz, 1H), 3.88-3.80 (m, 1H), 3.75-3.65 (m, 2H), 3.48-3.39 (m, 2H), 1.87-1.64 (m, 4H), 1.45 (s, 6H), 0.94 (t,  $J = 8.0$  Hz, 9H), 0.90 (s, 9H), 0.71-0.56 (m, 6H), 0.17 (s, 9H), 0.09 (s, 3H), 0.08 (s, 3H);  $^{13}\text{C NMR}$  (100 MHz,  $\text{CDCl}_3$ ):  $\delta$  104.1, 99.4, 89.1, 78.3, 72.1, 64.7, 60.9, 58.7, 37.4, 31.0, 29.9, 25.8, 19.3, 18.1, 7.2,



6.8, -0.2, -5.6; **HRMS (ESI<sup>+</sup>)** Calcd. for C<sub>27</sub>H<sub>56</sub>O<sub>5</sub>Si<sub>3</sub>+Cs, 677.2491; Found, 677.2477; **IR** (thin film, cm<sup>-1</sup>) 3492, 2955, 2877, 2360, 2183, 1463, 1414, 1251, 1107, 841, 736; **TLC**(85:15 Hex:EtOAc): R<sub>f</sub> = 0.54.

**Aldehyde 7:** Analytical data: [α]<sub>D</sub><sup>25.2</sup> -15.0 (*c* = 1.25, CHCl<sub>3</sub>); **<sup>1</sup>H NMR** (400 MHz, CDCl<sub>3</sub>): δ 9.56 (s, 1H), 4.68 (dd, *J* = 12.0, 2.8 Hz, 1H), 4.13 (dd, *J* = 12.0, 2.8 Hz, 1H), 3.74 (ddd, *J* = 12.0, 4.0, 2.8 Hz, 1H), 3.62 (ddd, *J* = 12.0, 4.0, 2.8 Hz, 1H), 1.90-1.65 (m, 4H), 1.40 (s, 3H), 1.39 (s, 3H), 0.98 (t, *J* = 8.0 Hz, 9H), 0.86 (s, 9H), 0.81-0.66 (m, 6H), 0.17 (s, 9H), 0.02 (s, 6H); **<sup>13</sup>C NMR** (100 MHz, CDCl<sub>3</sub>): δ 203.2, 103.9, 99.5, 89.4, 83.7, 72.3, 60.7, 57.8, 38.7, 30.9, 29.6, 25.8, 19.1, 18.1, 7.2, 6.9, -0.2, -5.5, -5.6; **HRMS (ESI<sup>+</sup>)** Calcd. for C<sub>27</sub>H<sub>54</sub>O<sub>5</sub>Si<sub>3</sub>+Cs, 675.2352; Found, 675.2354; **IR** (thin film, cm<sup>-1</sup>) 2955, 2876, 2360, 2342, 1736, 1462, 1415, 1380, 1251, 1110, 842, 738; **TLC**(85:15 Hex:EtOAc): R<sub>f</sub> = 0.67.

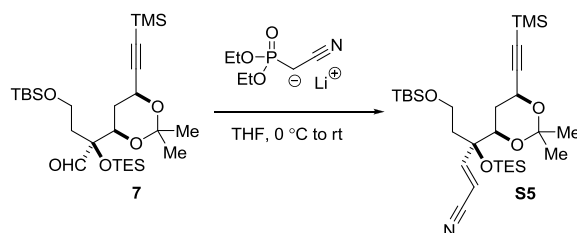

**(*R,E*)-6-((tert-butyldimethylsilyl)oxy)-4-((4*R*,6*S*)-2,2-dimethyl-6-((trimethylsilyl)ethynyl)-1,3-dioxan-4-yl)-4-((triethylsilyl)oxy)hex-2-enenitrile (5S):** A flame-dried 25-mL round-bottomed flask was charged with the Horner-Wadsworth-Emmons reagent (0.320 g, 1.81 mmol, 1.05 equiv). THF (11.0 mL) was added and the solution was cooled to 0 °C. *n*-Butyllithium (1.2 mL, 1.5 M in hexanes, 1.05 equiv) was added dropwise, and the resulting orange solution was stirred for 1 h at the same temperature. A second flame-dried 100-mL round-bottomed flask was charged with the aldehyde (0.917 g, 1.69 mmol, 1.0 equiv) and THF (25 mL). The aldehyde solution was cooled to 0 °C, and the solution of the metalated Horner-Wadsworth-Emmons reagent was added via cannula. After the addition was complete, the reaction was warmed to room temperature for 30 minutes, at which point the starting material had been completely consumed as indicated by TLC analysis. The reaction was quenched by the addition of saturated ammonium chloride (0.3 mL), and the resulting suspension was concentrated to approximately 3 mL *in vacuo*. The remaining suspension was loaded directly onto a short silica plug and eluted with 95:5 hexanes: ethyl acetate to give the desired nitrile (0.920 g, 96%) with greater than 25:1 diastereoselectivity for the (*E*)-isomer. Analytical data: [α]<sub>D</sub><sup>25.7</sup> +2.9 (*c* = 0.50, CHCl<sub>3</sub>); **<sup>1</sup>H NMR** (400 MHz, CDCl<sub>3</sub>): δ 6.81 (d, *J* = 16.0 Hz, 1H), 5.61 (d, *J* = 16.0 Hz, 1H), 4.60 (dd, *J* = 11.6, 2.0 Hz, 1H), 3.70 (dd, *J* = 10.8, 2 Hz, 1H), 2.14 (ddd, *J* = 21.2, 14.4, 7.2 Hz, 1H), 1.81 (ddd, *J* = 19.6, 13.6, 6.8 Hz, 1H), 1.70 (d, *J* = 12.8 Hz, 1H), 1.55-1.46 (m, 1H), 1.44 (s, 3H), 1.43 (s, 3H), 0.98 (t, *J* = 7.6 Hz, 9H), 0.89 (s, 9H), 0.65 (q, *J* = 8.0 Hz, 6H), 0.18 (s, 9H), 0.04 (s, 6H); **<sup>13</sup>C NMR** (100 MHz, CDCl<sub>3</sub>): δ 156.8, 117.6, 103.2, 99.5, 99.2, 89.8, 79.1, 74.2, 60.6, 58.3, 40.3, 32.0, 29.8, 25.9, 19.1, 18.2, 7.1, 6.7, -0.2, -5.3, -5.4; **HRMS (ESI<sup>+</sup>)** Calcd. for C<sub>29</sub>H<sub>55</sub>NO<sub>4</sub>Si<sub>3</sub>+Cs, 698.2494; Found, 698.2470; **IR** (thin film, cm<sup>-1</sup>) 2956, 2878, 2224, 1461, 1379, 1251, 1106, 840, 740; **TLC**(90:10 Hex:EtOAc): R<sub>f</sub> = 0.46.

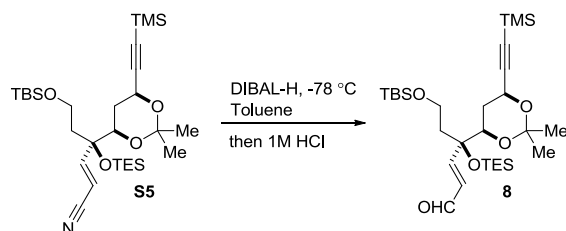

**(*R,E*)-6-((*tert*-butyldimethylsilyl)oxy)-4-((4*R*,6*S*)-2,2-dimethyl-6-((trimethylsilyl)ethynyl)-1,3-dioxan-4-yl)-4-((triethylsilyl)oxy)hex-2-enal (**8**):** A 50-mL oven dried and cooled round-bottomed flask was charged with the nitrile **S5** (0.920 g, 1.63 mmol, 1.0 equiv), and the flask was purged with N<sub>2</sub>. Dry toluene (20 mL) was added, and the resulting solution was cooled to -78 °C in an acetone/dry ice bath. A solution of DIBAL-H (0.56 M in toluene, 4.9 mL, 1.7 equiv) was added dropwise, and the reaction was stirred at the same temperature for 1.5 h. Methanol (2.5 mL) was added at -78 °C, and the solution was warmed to 0 °C. Ice cold 1M HCl (20 mL) was added, and the biphasic mixture was stirred vigorously for 10 min at room temperature. Diethyl ether (20 mL) was added and the layers were separated. The aqueous layer was extracted with additional ether (3x5 mL), and the combined organic extracts were washed with saturated sodium bicarbonate, water, and brine and dried with magnesium sulfate. The dried extracts were concentrated *in vacuo* to give a light yellow oil, which was purified via column chromatography (93.5:7.5 hexanes: ethyl acetate) to give enal **8** as a colorless oil (0.745 g, 81%). Analytical data:  $[\alpha]_D^{25.4} +6.2$  ( $c = 0.45$ , CHCl<sub>3</sub>); <sup>1</sup>H NMR (400 MHz, CDCl<sub>3</sub>): δ 9.60 (d,  $J = 8.0$  Hz, 1H), 6.88 (d,  $J = 15.6$  Hz, 1H), 6.30 (dd,  $J = 15.6, 8.0$  Hz, 1H), 4.62 (dd,  $J = 11.6, 1.6$  Hz, 1H), 3.77 (dd,  $J = 11.6, 1.6$  Hz, 1H), 3.76-3.52 (m, 2H), 2.20-2.13 (m, 1H), 1.92-1.85 (m, 1H), 1.76 (d,  $J = 13.2$  Hz, 1H), 1.53 (dd,  $J = 24.4, 12.0$  Hz, 1H), 1.44 (s, 6H), 0.97 (t,  $J = 8.0$  Hz, 9H), 0.86 (s, 9H), 0.65 (q,  $J = 8.0$  Hz, 6H), 0.16 (s, 9H), 0.02 (s, 3H), 0.01 (s, 3H); <sup>13</sup>C NMR (100 MHz, CDCl<sub>3</sub>): δ 193.6, 159.5, 131.7, 103.5, 99.5, 89.7, 79.0, 60.8, 58.6, 40.7, 32.1, 29.9, 25.9, 19.2, 18.2, 7.1, 6.9, -0.2, -5.3, -5.4; **HRMS (ESI<sup>+</sup>)** Calcd. for C<sub>29</sub>H<sub>56</sub>O<sub>5</sub>Si<sub>3</sub>+Na, 591.3334; Found, 591.3333; **IR** (thin film, cm<sup>-1</sup>) 2956, 2878, 1694, 1462, 1379, 1251, 1105, 842; **TLC**(90:10 Hex:EtOAc): R<sub>f</sub> = 0.33.

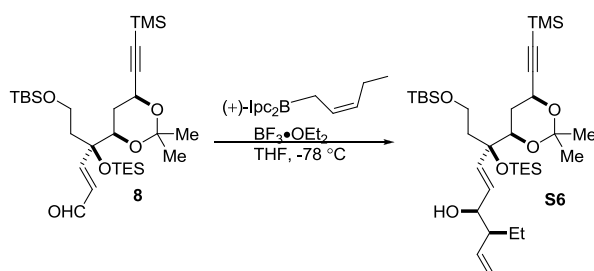

**(3*S*,4*S*,7*R*,*E*)-9-((*tert*-butyldimethylsilyl)oxy)-7-((4*R*,6*S*)-2,2-dimethyl-6-((trimethylsilyl)ethynyl)-1,3-dioxan-4-yl)-3-ethyl-7-((triethylsilyl)oxy)nona-1,5-dien-4-ol (**S6**):**

Preparation of (+)-Ipc<sub>2</sub>BH:

A flame-dried and cooled 200-mL round-bottomed flask equipped with a magnetic stir bar was charged with (–)- $\alpha$ -pinene (5 mL, 4.28 g, 31.4 mmol, 2.4 equiv) and THF (4 mL). The flask was purged with N<sub>2</sub> and was placed into a room temperature water bath. Borane•DMS (2M

in THF, 6.5 mL, 0.981 g, 13.08 mmol, 1.0 equiv) was added dropwise with vigorous stirring over 2 min. Stirring of the reaction was ceased, and the stir bar was removed. The flask was again purged with N<sub>2</sub>, and the resulting solution was allowed to sit at room temperature for 16 h. Crystals were observed on the side of the flask after 1 h at room temperature. The solvent was removed from the flask via cannula, and the remaining solid was washed with dry hexanes (2x20 mL), which was removed via cannula transfer. The flask was evacuated to remove residual solvent, and the resulting white solid was removed to a dry box freezer. The reagent was able to be stored without degradation for months when prepared and stored in this manner (2.7 g, 73%).

(+)-Ipc<sub>2</sub>BOMe was prepared *in situ* according to the following:

An oven-dried and cooled 50-mL round-bottomed flask was charged with Ipc<sub>2</sub>BH (2.95 g, 10.32 mmol, 2.5 equiv) under a nitrogen atmosphere and dry THF (30 mL). Dry MeOH (0.417 mL, 10.32 mmol, 2.5 equiv) was added dropwise, and the resulting solution was stirred at room temperature for 4 h. A second 250-mL oven-dried round-bottomed flask was charged with potassium *tert*-butoxide (0.926 g, 8.26 mmol, 2.0 equiv) under a nitrogen atmosphere. Dry THF (45 mL) and *cis*-2-pentene (2.68 mL, 24.8 mmol, 6.0 equiv) were added, and the solution was cooled to -50 °C in an acetone/dry ice bath. <sup>n</sup>Butyllithium (1.5 M, 5.5 mL, 2.0 equiv) was added dropwise, and the resulting orange solution was stirred at the same temperature for 5 minutes before cooling to -78 °C. The solution of (+)-Ipc<sub>2</sub>BOMe was added dropwise via cannula transfer, and the resulting colorless solution was stirred at -78°C for 20 minutes. BF<sub>3</sub>•OEt<sub>2</sub> (1.02 mL, 8.26 mmol, 2.0 equiv) was added, followed by a solution of the aldehyde (**8**) (2.35 g, 4.13 mmol, 1.0 equiv) in dry THF (10 mL + 5 mL rinse). The bath temperature was maintained at -78 °C until complete consumption of the starting material was indicated by TLC analysis (2 h). The reaction was quenched by the dropwise addition of 3M NaOH (6.0 mL) and 30% H<sub>2</sub>O<sub>2</sub> (3.2 mL). After warming to room temperature, the suspension was refluxed for 1 h. The cooled biphasic mixture was partitioned between ether and water, and the combined ethereal extracts were washed with water and brine and dried with magnesium sulfate. The organic extracts were concentrated *in vacuo* to give a crude oil, which was purified via flash chromatography (93.5:7.5 to 90:10 petroleum ether: ether) to give the desired product as a viscous colorless oil (2.23 g, 85%). The title compound was obtained as a diastereomeric mixture whose ratio was dependent on the initial enantiomeric ratio of the β-lactone used in the initial 3-component coupling. This diastereomeric mixture was progressed without separation until the final compound (**16**), at which point separation of the isomers via HPLC afforded diastereomerically pure material. Analytical data:  $[\alpha]_D^{25.2} -1.8$  (*c* = 0.50, CHCl<sub>3</sub>); <sup>1</sup>H NMR (500 MHz, CDCl<sub>3</sub>): δ 5.73 (dd, *J* = 16.0, 5.5 Hz, 1H), 5.66 (dd, *J* = 15.5, 10.5 Hz, 1H), 5.55 (ddd, *J* = 17.5, 9.5, 6.0 Hz, 1H), 5.17 (d, *J* = 10.0 Hz, 1H), 5.11 (d, *J* = 17.0 Hz, 1H), 4.60 (d, *J* = 11.5 Hz, 1H), 4.13 (t, *J* = 6.0 Hz, 1H), 3.66-3.61 (m, 3H), 1.94-1.91 (m, 2H), 1.59-1.42 (m, 2H), 1.42 (s, 3H), 1.41 (s, 3H), 0.96 (t, *J* = 7.5 Hz, 9H), 0.89 (s, 9H), 0.63 (q, *J* = 7.5 Hz, 6H), 0.17 (s, 9H), 0.04 (s, 6H); <sup>13</sup>C NMR (100 MHz, CDCl<sub>3</sub>): δ 138.3, 132.8, 130.6, 118.0, 104.1, 99.1, 89.1, 78.2, 74.1, 74.0, 60.9, 59.4, 52.7, 40.0, 31.9, 29.9, 26.0, 23.3, 19.2, 18.3, 11.9, 7.2, 6.9, -0.2, -5.2, -5.3; HRMS (ESI<sup>+</sup>) Calcd. for C<sub>34</sub>H<sub>66</sub>O<sub>5</sub>Si<sub>3</sub>+Na, 661.4116; Found, 661.4091; IR (thin film, cm<sup>-1</sup>) 3465, 2956, 2877, 2183, 1461, 1378, 1251, 1090, 842; TLC(90:10 Hex:EtOAc): R<sub>f</sub> = 0.30.

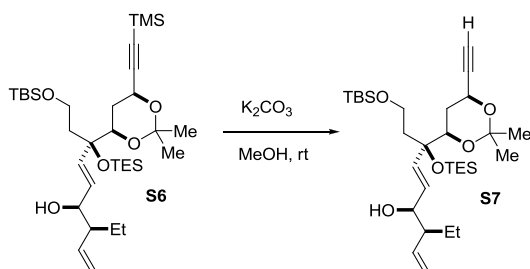

**(3*S*,4*S*,7*R*,*E*)-9-((*tert*-butyldimethylsilyl)oxy)-3-ethyl-7-((4*R*,6*S*)-6-ethynyl-2,2-dimethyl-1,3-dioxan-4-yl)-7-((triethylsilyl)oxy)nona-1,5-dien-4-ol (**S5**):** Silyl alkyne **S6** (2.2 g, 3.46 mmol, 1.0 equiv) was dissolved in methanol (20 mL), and potassium carbonate (0.2 g, 1.45 mmol, 0.42 equiv) was added at room temperature. Once the starting material was completely consumed as indicated by TLC analysis ( $R_f = 0.30$ , 90:10 Hex:EtOAc; 1 h), the suspension was loaded directly onto a short silica plug and eluted with 80:20 hexanes:ethyl acetate to give the crude alkyne. Analytical data:  $[\alpha]_D^{25.3} +6.2$  ( $c = 1.70$ ,  $\text{CHCl}_3$ );  $^1\text{H NMR}$  (500 MHz,  $\text{CDCl}_3$ ):  $\delta$  5.72 (dd,  $J = 16.0, 5.5$  Hz, 1H), 5.65 (d,  $J = 14.0$  Hz, 1H), 5.55 (dd,  $J = 9.5, 7.5$  Hz, 1H), 5.17 (d,  $J = 15.0$  Hz, 1H), 5.11 (d,  $J = 17.0$  Hz, 1H), 4.60 (d,  $J = 11.5$  Hz, 1H), 4.13 (br. s., 1H), 3.68-3.63 (m, 3H), 2.46 (s, 1H), 2.14-2.12 (m, 1H), 1.94-1.91 (m, 6H), 1.43 (s, 3H), 1.41 (s, 3H), 0.96 (t,  $J = 7.5$  Hz, 9H), 0.89 (s, 9H), 0.63 (q,  $J = 7.5$  Hz, 6H), 0.04 (s, 6H);  $^{13}\text{C NMR}$  (100 MHz,  $\text{CDCl}_3$ ):  $\delta$  138.3, 132.7, 130.7, 118.1, 99.2, 82.7, 78.1, 73.9, 73.8, 72.7, 60.3, 59.4, 52.7, 40.1, 31.6, 29.9, 26.0, 23.3, 19.2, 18.3, 11.9, 7.2, 6.8, -5.2, -5.3; **HRMS (ESI<sup>+</sup>)** Calcd. for  $\text{C}_{31}\text{H}_{58}\text{O}_5\text{Si}_2 + \text{Cs}$ , 825.3379; Found, 825.3399; **IR** (thin film,  $\text{cm}^{-1}$ ) 3433, 3032, 2958, 2359, 2253, 1637, 908, 725, 650, 452; **TLC**(75:25 Hex:EtOAc):  $R_f = 0.39$ .

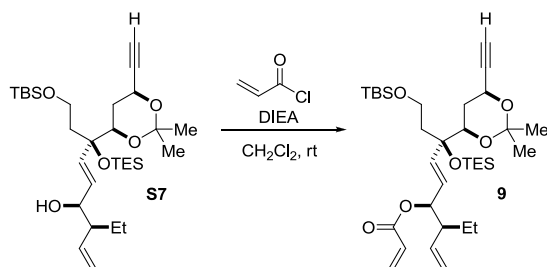

**(3*S*,4*S*,7*R*,*E*)-9-((*tert*-butyldimethylsilyl)oxy)-3-ethyl-7-((4*R*,6*S*)-6-ethynyl-2,2-dimethyl-1,3-dioxan-4-yl)-7-((triethylsilyl)oxy)nona-1,5-dien-4-yl acrylate (**9**):** A flame-dried and cooled 100-mL round-bottomed flask equipped with a magnetic stir bar was charged with the crude allylic alcohol (**S7**) (1.95 g, 3.46 mmol, 1.0 equiv) and dry  $\text{CH}_2\text{Cl}_2$  (40 mL), and the solution was cooled to 0 °C. Hünig's base (1.82 mL, 10.73 mmol, 3.1 equiv) and acryloyl chloride (0.846 mL, 10.37 mmol, 3.0 equiv) were added dropwise. After maintaining the solution at 0 °C for 1.5, TLC analysis indicated complete consumption of the starting material ( $R_f = 0.39$ , 75:25 Hex:EtOAc). The reaction was quenched by the addition of saturated sodium bicarbonate (10.0 mL), and the organic layer was washed with additional saturated sodium bicarbonate (3x 10.0 mL), water, and brine and was dried with magnesium sulfate. Concentration *in vacuo* yielded a colorless oil (2.14 g) that was used without additional purification. Analytical data:  $[\alpha]_D^{25.0} +24.9$  ( $c = 0.21$ ,  $\text{CHCl}_3$ );  $^1\text{H NMR}$  (400 MHz,  $\text{CDCl}_3$ ):  $\delta$  6.40 (d,  $J = 17.6$  Hz, 1H), 6.12 (dd,  $J = 17.2, 10.4$  Hz, 1H), 5.81 (d,  $J = 13.0$  Hz, 1H), 5.70-5.52 (m, 3H), 5.32 (t,  $J = 7.5$  Hz, 1H), 5.14 (d,  $J = 12.5$  Hz, 1H), 5.05 (d,  $J = 16.8$  Hz, 1H), 4.58 (d,  $J = 12.0$  Hz, 1H), 3.66-3.59 (m, 3H),

2.45 (s, 1H), 2.32-2.19 (m, 1H), 1.99-1.80 (m, 2H), 1.77-1.61 (m, 2H), 1.41 (s, 3H), 1.39 (s, 3H), 1.35-1.15 (m, 2H), 0.94 (t,  $J = 9.5$  Hz, 9H), 0.88 (s, 9H), 0.60 (q,  $J = 7.6$  Hz, 6H), 0.03 (s, 6H);  $^{13}\text{C}$  NMR (100 MHz,  $\text{CDCl}_3$ ):  $\delta$  165.2, 137.4, 135.2, 130.5, 128.7, 126.7, 117.6, 99.2, 82.7, 778.0, 76.2, 73.8, 72.6, 60.3, 59.3, 49.8, 40.0, 31.2, 29.9, 26.0, 23.2, 19.2, 18.3, 11.5, 7.2, 6., -5.2, -5.3; **HRMS** ( $\text{ESI}^+$ ) Calcd. for  $\text{C}_{34}\text{H}_{60}\text{O}_6\text{Si}_2+\text{Cs}$ , 753.2983; Found, 753.3014; **IR** (thin film,  $\text{cm}^{-1}$ ) 3426, 2956, 2877, 2359, 1798, 1725, 1634, 1402, 1097, 981, 836, 630; **TLC**(80:20 Hex:EtOAc):  $R_f = 0.63$ .

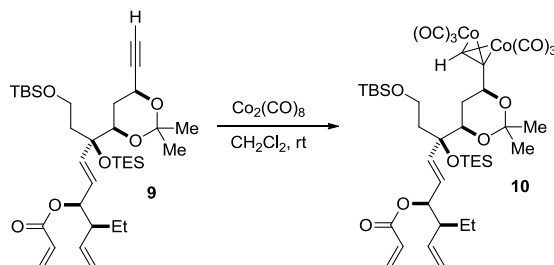

**Protected Alkyne 10:** The crude acrylate **9** (2.14 g, 3.46 mmol, 1.0 equiv) was dissolved in dry  $\text{CH}_2\text{Cl}_2$  (40 mL) under an atmosphere of nitrogen, and dicobalt octacarbonyl (1.18 g, 3.46 mmol, 1.0 equiv) was added. The reaction was stirred at room temperature for 1.5 h, at which point TLC analysis indicated complete consumption of the starting material ( $R_f = 0.63$ , 80:20 Hex:EtOAc). The reaction was concentrated *in vacuo*, and the crude material was purified via flash chromatography (95:5 petroleum ether: ether) to give the desired product as a dark red oil (2.7 g, 89% over 3 steps). Analytical data:  $[\alpha]_D^{24.2} -153.9$  ( $c = 0.46$ ,  $\text{CHCl}_3$ );  $^1\text{H}$  NMR (400 MHz,  $\text{CDCl}_3$ ):  $\delta$  6.38 (d,  $J = 17.2$  Hz, 1H), 6.10 (dd,  $J = 28.0, 10.4$  Hz, 1H), 5.96 (s, 1H), 5.80 (d,  $J = 10.4$  Hz, 1H), 5.74-5.54 (m, 3H), 5.36 (t,  $J = 5.2$  Hz, 1H), 5.10 (d,  $J = 10.4$  Hz, 1H), 5.04 (d,  $J = 17.2$  Hz, 1H), 4.85 (d,  $J = 10.8$  Hz, 1H), 3.78 (dd,  $J = 10.8, 7.2$  Hz, 1H), 3.68-3.63 (m, 2H), 2.27-2.20 (m, 1H), 1.95-1.90 (m, 2H), 1.82 (d,  $J = 12.4$  Hz, 1H), 1.49-1.32 (m, 3H), 1.45 (s, 3H), 1.36 (s, 3H), 0.92 (t,  $J = 8.0$  Hz, 9H), 0.89 (s, 9H), 0.63-0.56 (m, 6H), 0.04 (s, 6H);  $^{13}\text{C}$  NMR (100 MHz,  $\text{CDCl}_3$ ):  $\delta$  199.7, 165.1, 137.5, 134.6, 130.5, 128.7, 126.3, 117.3, 99.2, 77.9, 75.9, 74.0, 70.4, 69.6, 59.4, 49.8, 40.1, 34.0, 29.5, 26.0, 22.9, 19.8, 18.4, 11.6, 7.2, 6.8, 6.7, -5.2, -5.3; **HRMS** ( $\text{ESI}^+$ ) Calcd. for  $\text{C}_{40}\text{H}_{60}\text{Co}_2\text{O}_{12}\text{Si}_2+\text{Cs}$ , 1039.1342; Found, 1039.1344; **IR** (thin film,  $\text{cm}^{-1}$ ) 2956, 2929, 2877, 2857, 2095, 2054, 2030, 1726, 1462, 1404, 1190, 1098, 836; **TLC**(80:20 Hex:EtOAc):  $R_f = 0.71$ .

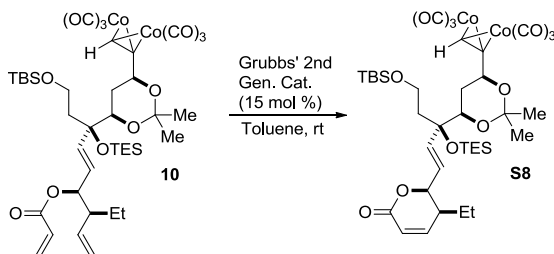

**Dihydropyrone 88:** A 250-mL flame-dried and cooled round-bottomed flask was charged with acrylate **10** (0.530 g, 0.543 mmol, 1.0 equiv). Under a nitrogen atmosphere, dry toluene (125 mL) and Grubbs' 2nd generation catalyst (0.092 g, 0.122 mmol, 0.15 equiv) were added, and the reaction was stirred under nitrogen for 16 h at room temperature. The solvent was removed *in vacuo*, and the resulting crude oil was purified via column chromatography (90:10 to 80:20

hexanes:ethyl acetate) to give the dihydropyrone as a dark red oil (0.340 g, 66%). Analytical data:  $[\alpha]_D^{24.7}$  -29.5 ( $c = 2.55$ ,  $\text{CHCl}_3$ );  $^1\text{H NMR}$  (500 MHz,  $\text{CDCl}_3$ ):  $\delta$  6.93 (dd,  $J = 9.5, 5.0$  Hz, 1H), 6.04 (d,  $J = 9.5$  Hz, 1H), 5.98 (s, 1H), 5.93 (d,  $J = 16.0$  Hz, 1H), 5.74 (dd,  $J = 15.5, 5.5$  Hz, 1H), 4.99 (t,  $J = 4.5$  Hz, 1H), 4.87 (d,  $J = 11.5$  Hz, 1H), 3.82 (d,  $J = 11.0$  Hz, 1H), 3.66 (t,  $J = 8.0$  Hz, 2H), 2.43-2.34 (m, 1H), 2.07-1.82 (m, 3H), 1.68-1.56 (m, 1H), 1.47 (s, 3H), 1.37 (s, 3H), 0.96 (t,  $J = 8.0$  Hz, 9H), 0.95 (t,  $J = 7.0$  Hz, 9H), 0.89 (s, 9H), 0.63 (q,  $J = 7.5$  Hz, 6H), 0.04 (s, 6H);  $^{13}\text{C NMR}$  (100 MHz,  $\text{CDCl}_3$ ):  $\delta$  199, 6, 164.0, 149.8, 135.7, 124.6, 120.9, 99.4, 97.0, 80.1, 78.1, 74.4, 40.6, 69.6, 59.3, 40.5, 39.4, 34.0, 29.5, 25.9, 21.6, 19.7, 18.3, 11.0, 7.2, 6.8, -5.2, -5.3; **HRMS (ESI<sup>+</sup>)** Calcd. for  $\text{C}_{38}\text{H}_{56}\text{Co}_2\text{O}_{12}\text{Si}_2+\text{Cs}$ , 1011.1029; Found, 1011.1057; **IR** (thin film,  $\text{cm}^{-1}$ ) 2928, 2856, 2360, 2095, 2054, 2029, 1732, 1462, 1379, 1254, 1099, 835, 776; **TLC**(80:20 Hex:EtOAc):  $R_f = 0.48$ .

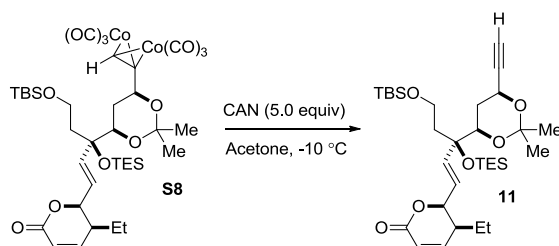

**(5*S*,6*S*)-6-((*R,E*)-5-((tert-butyl dimethylsilyloxy)-3-((4*R*,6*S*)-6-ethynyl-2,2-dimethyl-1,3-dioxan-4-yl)-3-((triethylsilyloxy)pent-1-en-1-yl)-5-ethyl-5,6-dihydro-2*H*-pyran-2-one (11):** A 50-mL round-bottomed flask was charged with **S8** (0.340 g, 0.400 mmol, 1.0 equiv) and acetone (20 mL). The flask was cooled to  $-10\text{ }^\circ\text{C}$  (acetone-ice), and ceric ammonium nitrate (0.988 g, 1.8 mmol, 4.5 equiv) was added in small portions. The reaction was stirred at  $-10\text{ }^\circ\text{C}$  for 45 minutes, at which time TLC analysis indicated complete consumption of the starting material. The reaction was poured into saturated aqueous sodium bicarbonate (20 mL) and was extracted with diethyl ether (3x 20 mL). The combined organic extracts were washed with saturated bicarbonate, water, and brine and were dried with magnesium sulfate. Removal of the solvent *in vacuo* afforded a light yellow oil (220 mg, 93%) that was used without further purification. Analytical data:  $[\alpha]_D^{25.3}$  -57.6 ( $c = 0.49$ ,  $\text{CHCl}_3$ );  $^1\text{H NMR}$  (500 MHz,  $\text{CDCl}_3$ ):  $\delta$  6.96 (dd,  $J = 10.0, 5.5$  Hz, 1H), 6.06 (d,  $J = 10.0$  Hz, 1H), 5.90 (d,  $J = 15.5$  Hz, 1H), 5.76 (dd,  $J = 15.5, 5.5$  Hz, 1H), 5.03 (t,  $J = 5.0$  Hz, 1H), 4.59 (d,  $J = 12.0$  Hz, 1H), 3.69 (d,  $J = 11.5$  Hz, 1H), 3.63 (t,  $J = 8.0$  Hz, 2H), 2.46 (s, 1H), 2.42-2.41 (m, 1H), 1.76 (d,  $J = 13.0$  Hz, 1H), 1.60-1.41 (m, 3H), 0.96 (t,  $J = 8.0$  Hz, 9H), 0.96 (t,  $J = 8.0$  Hz, 3H); 2 coincident resonances, 0.95 (t,  $J = 7.0$  Hz, 9H), 0.88 (s, 9H), 0.64 (dq,  $J = 8.0, 4.0$  Hz, 6H), 0.04 (s, 6H);  $^{13}\text{C NMR}$  (100 MHz,  $\text{CDCl}_3$ ):  $\delta$  164.0, 149.9, 135.2, 124.8, 120.8, 103.8, 99.2, 89.2, 80.0, 78.2, 74.2, 60.7, 59.2, 39.7, 39.6, 32.0, 29.9, 25.9, 21.5, 19.2, 18.2, 11.0, 7.2, 6.8, -0.2, -5.3, -5.4; **HRMS (ESI<sup>+</sup>)** Calcd. for  $\text{C}_{32}\text{H}_{56}\text{O}_6\text{Si}_2+\text{Na}$ , 615.3513; Found, 615.3515; **IR** (thin film,  $\text{cm}^{-1}$ ) 3420, 3029, 2874, 2359, 1645, 1384, 1112, 821, 581; **TLC**(75:25 Hex:EtOAc):  $R_f = 0.32$ .

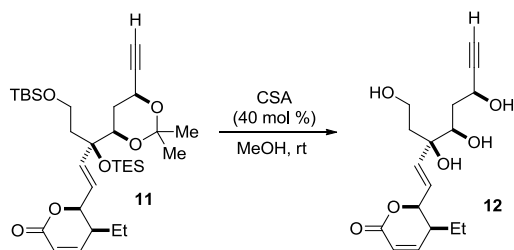

**(5*S*,6*S*)-5-ethyl-6-((3*R*,4*R*,6*S*,*E*)-3,4,6-trihydroxy-3-(2-hydroxyethyl)oct-1-en-7-yn-1-yl)-5,6-dihydro-2*H*-pyran-2-one (12):** A 20-mL scintillation vial was charged with alkyne **11** (150 mg, 0.253 mmol, 1.0 equiv) and methanol (5 mL). CSA (24 mg, 0.101 mmol, 0.4 equiv) was added, and the reaction was allowed to stir at room temperature for 1 h. The reaction was quenched with triethylamine (0.050 mL) and was concentrated *in vacuo*. The crude material was pushed through a short silica plug (95:5 to 92.5:7.5 CH<sub>2</sub>Cl<sub>2</sub>: MeOH, SiO<sub>2</sub> deactivated with TEA) to give the crude tetraol as a yellow oil that was used without further purification. Analytical data:  $[\alpha]_D^{25.4} +78.3$  ( $c = 0.5$ , CHCl<sub>3</sub>); **<sup>1</sup>H NMR** (400 MHz, CDCl<sub>3</sub>):  $\delta$  6.99 (dd,  $J = 5.5, 10.0$  Hz, 1H), 6.06 (d,  $J = 10.0$  Hz, 1H), 6.00 (dd,  $J = 5.0, 15.5$  Hz, 1H), 5.95 (d,  $J = 16.0$  Hz, 1H), 5.09 (t,  $J = 4.5$  Hz, 1H), 4.62 (br. s., 1H), 4.34 (br. s., 1H), 3.87 (br. s., 2H), 3.75 (d,  $J = 9.5$  Hz, 1H), 3.65 (br. s., 1H), 3.00 (br. s., 1H), 2.50 (d,  $J = 1.5$  Hz, 1H), 2.50-2.46 (m, 1H), 2.12-1.42 (m, 6H), 0.97 (t,  $J = 7.5$  Hz, 3H); **<sup>13</sup>C NMR** (100 MHz, CDCl<sub>3</sub>):  $\delta$  164.4, 150.4, 135.4, 126.0, 120.6, 84.1, 80.3, 77.9, 76.3, 73.2, 61.8, 59.7, 39.2, 38.2, 35.9, 29.7, 21.5, 11.0; **HRMS (ESI<sup>+</sup>)** Calcd. for C<sub>17</sub>H<sub>24</sub>O<sub>6</sub>+Na, 347.1485; Found, 347.1471; **IR** (thin film, cm<sup>-1</sup>) 3433, 3019, 2400, 1645, 1521, 1215, 928, 768, 669; **TLC**(90:10 CH<sub>2</sub>Cl<sub>2</sub>:MeOH): R<sub>f</sub> = 0.37.

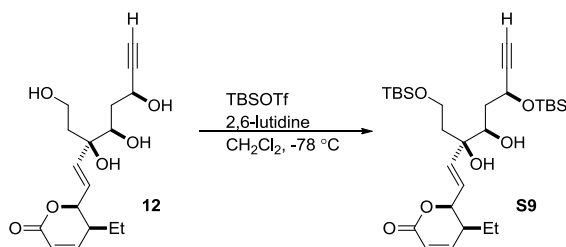

**(5*S*,6*S*)-6-((3*R*,4*R*,6*S*,*E*)-6-((tert-butyldimethylsilyl)oxy)-3-(2-((tert-butyldimethylsilyl)oxy)ethyl)-3,4-dihydroxyoct-1-en-7-yn-1-yl)-5-ethyl-5,6-dihydro-2*H*-pyran-2-one (9):** An oven-dried 20-mL scintillation vial was charged with crude tetraol **12** (82 mg, 0.218 mmol, 1.0 equiv) and CH<sub>2</sub>Cl<sub>2</sub> (6.0 mL). The solution was cooled to -78 °C in an acetone-dry ice bath, and 2,6-lutidine (0.060 mL, 54 mg, 0.501 mmol, 2.3 equiv) and TBSOTf (0.105 mL, 121 mg, 0.458 mmol, 2.1 equiv) were added successively. The reaction was maintained at -78 °C for 10 min, at which point TLC indicated complete consumption of the starting material and clean formation of the desired diol. The reaction was quenched by the addition of MeOH (0.100 mL) and was warmed to room temperature. After diluting with diethyl ether (20 mL), the solution was washed with 1 M HCl (3x5 mL), saturated aqueous NaHCO<sub>3</sub> (5 mL), water (5 mL), and brine (5 mL) and was dried with sodium sulfate. Concentration *in vacuo* gave a light yellow oil (110 mg) that was used without additional purification. Analytical data:  $[\alpha]_D^{25.6} +41.2$  ( $c = 0.3$ , CHCl<sub>3</sub>); **<sup>1</sup>H NMR** (400 MHz, CDCl<sub>3</sub>):  $\delta$  6.89 (dd,  $J = 10.0, 4.8$  Hz, 1H), 6.04-5.88 (m, 3H), 5.03 (t,  $J = 4.4$  Hz, 1H), 4.55 (dd,  $J = 13.6, 1.6$  Hz, 1H), 4.53 (br. s. 1H), 3.83 (t,  $J = 3.6$  Hz, 2H), 3.66 (d,  $J = 9.2$  Hz, 1H), 2.48-2.42 (m, 1H), 2.40 (d,  $J = 2.0$  Hz, 1H), 2.01-1.36 (m, 6H), 0.94 (t,  $J = 7.6$  Hz, 3H), 0.88 (s, 9H), 0.86 (s, 9H), 0.15 (s, 3H), 0.13 (s, 3H), 0.05 (s, 3H), 0.04 (s, 3H); **<sup>13</sup>C NMR** (100

MHz,  $\text{CDCl}_3$ ):  $\delta$  163.8, 149.5, 136.3, 125.4, 120.9, 84.6, 80.6, 80.0, 77.4, 75.8, 73.0, 62.9, 60.8, 39.4, 36.5, 25.7, 25.7 (2 coincident resonances), 21.6, 18.0, 17.9, 11.0, -4.5, -5.2, -5.7, -5.8; **HRMS (ESI<sup>+</sup>)** Calcd. for  $\text{C}_{29}\text{H}_{52}\text{O}_6\text{Si}_2+\text{Cs}$ , 685.2357; Found, 685.2366; **IR** (thin film,  $\text{cm}^{-1}$ ): 3433, 3019, 2930, 2359, 1646, 1472, 1212, 983, 769, 668; **TLC**(90:10  $\text{CH}_2\text{Cl}_2$ :MeOH):  $R_f = 0.79$ .

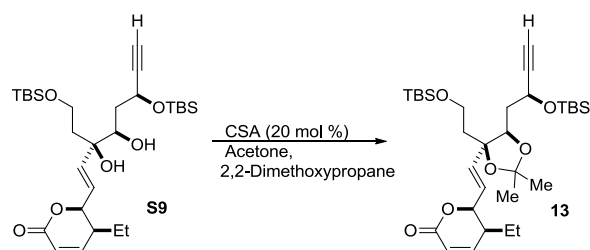

**(5*S*,6*S*)-6-((*E*)-2-((4*R*,5*S*)-5-((*S*)-2-((tert-butyl dimethylsilyloxy)but-3-yn-1-yl)-4-(2-((tert-butyl dimethylsilyloxy)ethyl)-2,2-dimethyl-1,3-dioxolan-4-yl)vinyl)-5-ethyl-5,6-dihydro-2*H*-pyran-2-one (13)**: A 20-mL scintillation vial was charged with crude diol **S9** (110 mg, 0.200 mmol, 1.0 equiv). Dry acetone (6.0 mL) and 2,2-dimethoxypropane (6.0 mL) were added, followed by CSA (10.0 mg, 0.040 mmol, 0.22 equiv). The reaction was allowed to stir at room temperature for 1.5 h, at which point TLC analysis indicated complete consumption of the diol ( $R_f = 0.45$ , 60:40 hexanes:EtOAc). The reaction was quenched with triethylamine (4 drops) and was concentrated *in vacuo*. The resulting crude oil was purified via flash chromatography, eluting with 80:20 hexanes: ethyl acetate to give the desired product in 73% yield over 3 steps (109 mg) as a colorless oil. Analytical data:  $[\alpha]_D^{24.3} +43.9$  ( $c = 0.3$ ,  $\text{CHCl}_3$ ); **<sup>1</sup>H NMR** (400 MHz,  $\text{CDCl}_3$ ):  $\delta$  6.94 (dd,  $J = 9.6, 5.6$  Hz, 1H), 6.03 (d,  $J = 10.0$  Hz, 1H), 5.90-5.72 (br. s., 2H), 4.98 (t,  $J = 3.6$  Hz, 1H), 4.50 (dd,  $J = 8.0, 5.6$  Hz, 1H), 3.87 (d,  $J = 8.8$  Hz, 1H), 3.75-3.56 (m, 2H), 2.44-2.23 (m, 1H), 2.44 (s, 1H), 2.00-1.31 (m, 6H), 0.92 (t,  $J = 7.6$  Hz, 3H), 0.88 (s, 9H), 0.86 (s, 9H), 0.13 (s, 3H), 0.11 (s, 3H), 0.01 (s, 6H); **<sup>13</sup>C NMR** (100 MHz,  $\text{CDCl}_3$ ):  $\delta$  163.6, 149.5, 134.3, 124.5, 121.0, 108.1, 108.0, 84.4, 82.8, 80.4, 79.6, 73.2, 61.3, 59.4, 39.3, 37.5, 37.2, 28.3, 26.3, 25.9, 25.7, 21.6, 18.3, 18.1, 10.9, -4.6, -5.0, -5.3; **HRMS (ESI<sup>+</sup>)** Calcd. for  $\text{C}_{32}\text{H}_{56}\text{O}_6\text{Si}_2+\text{Na}$ , 615.3513; Found, 615.3554; **IR** (thin film,  $\text{cm}^{-1}$ ): 3019, 1521, 1215, 930, 758, 669, 521, 509; **TLC**(97.5:2.5  $\text{CH}_2\text{Cl}_2$ :MeOH):  $R_f = 0.72$ .

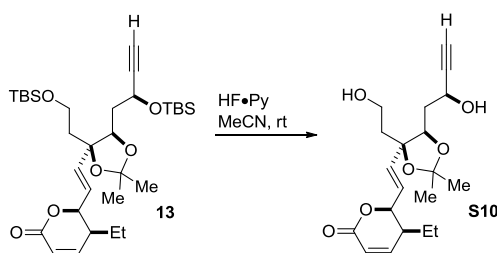

**(5*S*,6*S*)-5-ethyl-6-((*E*)-2-((4*R*,5*S*)-5-((*S*)-2-hydroxybut-3-yn-1-yl)-4-(2-hydroxyethyl)-2,2-dimethyl-1,3-dioxolan-4-yl)vinyl)-5,6-dihydro-2*H*-pyran-2-one (S10)**: A plastic scintillation vial equipped with a magnetic stir bar was charged with **13** (97 mg, 0.163 mmol, 1.0 equiv) and acetonitrile (4 mL). The resulting solution was cooled to 0°C, and HF•pyridine (70% HF, 0.25 mL) was added dropwise. The solution was allowed to warm to room temperature and was stirred for 90 min. The reaction was quenched by the addition of saturated aqueous  $\text{NaHCO}_3$  (5.0 mL). The resulting suspension was diluted with EtOAc, and the layers were separated. The



aqueous layer was extracted with EtOAc, and the combined organic extracts were washed with 1M HCl, NaHCO<sub>3</sub>, and brine and dried with MgSO<sub>4</sub>. The solvent was removed *in vacuo* to afford a crude white solid that was used without additional purification (65 mg). Analytical data:  $[\alpha]_D^{25.6} +99.4$  ( $c = 0.45$ , CHCl<sub>3</sub>); <sup>1</sup>H NMR (500 MHz, CDCl<sub>3</sub>): δ 6.98(dd,  $J = 9.5, 5.5$  Hz, 1H), 6.07(d,  $J = 9.5$  Hz, 1H), 6.00-5.87 (m, 2H), 5.06 (t,  $J = 3.5$  Hz, 1H), 4.57 (br. s, 1H), 3.96 (d,  $J = 10.5$  Hz, 1H), 3.81 (dt,  $J = 10.5, 4.0$  Hz, 1H), 3.79-3.71 (m, 1H), 3.79-3.71 (m, 1H), 2.69 (br. s, 1H), 2.55 (br s, 1H), 2.49 (d,  $J = 1.5$  Hz, 1H), 2.46-2.43 (m, 1H), 2.17-1.53 (m, 4H), 1.53 (s, 3H), 1.38 (s, 3H), 0.96 (t,  $J = 7.5$  Hz, 3H); <sup>13</sup>C NMR (100 MHz, CDCl<sub>3</sub>): δ 163.8, 150.0, 132.6, 125.4, 120.8, 109.0, 85.3, 83.5, 81.4, 79.3, 73.6, 61.1, 59.5, 39.1, 36.4, 35.4, 28.1, 26.3, 21.6, 11.0; **HRMS (ESI<sup>+</sup>)** Calcd. for C<sub>20</sub>H<sub>28</sub>O<sub>6</sub>+Na, 387.1784; Found, 387.1773; **IR** (thin film, cm<sup>-1</sup>) 3433, 2389, 2095, 1900, 1690, 1641, 1549, 1501, 1217; **TLC**(75:25 Hex:EtOAc): R<sub>f</sub> = 0.17.

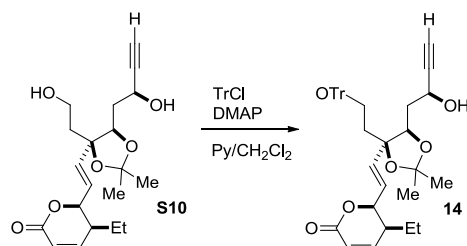

**(5*S*,6*S*)-5-ethyl-6-((*E*)-2-((4*R*,5*S*)-5-((*S*)-2-hydroxybut-3-yn-1-yl)-2,2-dimethyl-4-(2-(trityloxy)ethyl)-1,3-dioxolan-4-yl)vinyl)-5,6-dihydro-2H-pyran-2-one (14):**

An oven-dried and cooled 20-mL scintillation vial equipped with a magnetic stir bar was charged with diol **S10** (35 mg, 0.097 mmol, 1.0 equiv), TrCl (81 mg, 0.290 mmol, 3.0 equiv), and DMAP (cat.). CH<sub>2</sub>Cl<sub>2</sub> (2.0 mL) and pyridine (0.2 mL) were added, and the resulting solution was allowed to stir at rt for 16 h. The reaction was quenched by the addition of saturated aqueous NaHCO<sub>3</sub> and was diluted with Et<sub>2</sub>O. The resulting suspension was washed with aqueous NaHCO<sub>3</sub> and brine and dried with MgSO<sub>4</sub>. After concentration *in vacuo*, the crude product was purified via flash chromatography, eluting with a gradient of 80:20 to 60:40 hexanes:EtOAc, to yield the title compound as a colorless oil (44.5 mg, 76% from **13**). Analytical data:  $[\alpha]_D^{24.4} +48.0$  ( $c = 0.70$ , CHCl<sub>3</sub>); <sup>1</sup>H NMR (500 MHz, CDCl<sub>3</sub>): δ 7.41-7.19 (m, 15H), 6.87 (dd,  $J = 9.5, 5.5$  Hz, 1H), 5.97 (d,  $J = 10.0$  Hz, 1H), 5.73 (d,  $J = 22.5$  Hz, 1H), 5.67 (dd,  $J = 19.5, 4.0$  Hz, 1H), 4.91 (t,  $J = 3.5$  Hz, 1H), 4.55 (t,  $J = 3.0$  Hz, 1H), 3.82 (dd,  $J = 10.5, 2.0$  Hz, 1H), 3.32-3.31 (m, 1H), 3.07-3.05 (m, 1H), 2.68 (d,  $J = 3.0$  Hz, 1H), 2.49 (d,  $J = 1.5$  Hz, 1H), 2.30-1.62 (m, 5H), 1.36-1.30 (m, 2H), 1.36 (s, 3H), 1.30 (s, 3H), 0.76 (t,  $J = 7.5$  Hz, 3H); <sup>13</sup>C NMR (100 MHz, CDCl<sub>3</sub>): δ 163.9, 149.9, 144.2, 144.2, 132.9, 128.6, 128.6, 127.7, 127.7, 126.9, 124.6, 120.7, 108.7, 86.8, 83.6, 83.1, 81.9, 79.2, 73.3, 61.4, 59.8, 38.9, 36.4, 34.2, 28.2, 26.5, 21.4, 10.9; **HRMS (ESI<sup>+</sup>)** Calcd. for C<sub>39</sub>H<sub>42</sub>O<sub>6</sub>+Na, 629.2879; Found, 629.2871; **IR** (thin film, cm<sup>-1</sup>) 3434, 3019, 2849, 2399, 2083, 1900, 1724, 1612, 1482, 1216, 1045, 755; **TLC**(75:25 Hex:EtOAc): R<sub>f</sub> = 0.77.

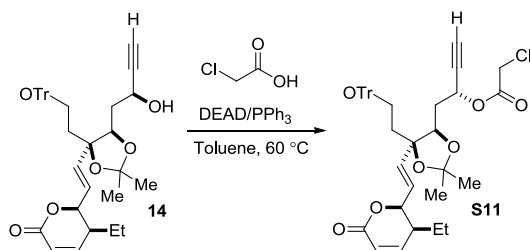

**(R)-1-((4S,5R)-5-((E)-2-((2S,3S)-3-ethyl-6-oxo-3,6-dihydro-2H-pyran-2-yl)vinyl)-2,2-dimethyl-5-(2-(trityloxy)ethyl)-1,3-dioxolan-4-yl)but-3-yn-2-yl 2-chloroacetate (S11):** An oven-dried and cooled 20-mL scintillation vial equipped with magnetic stir bar was charged with alcohol **14** (85 mg, 0.141 mmol, 1.0 equiv), chloroacetic acid (53 mg, 0.566 mmol, 4.0 equiv), and PPh<sub>3</sub> (78 mg, 0.296 mmol, 2.1 equiv). The vial was purged with N<sub>2</sub>, and toluene (2.0 mL) was added. DEAD (43 μL, 49 mg, 0.282 mmol, 2.0 equiv) was added dropwise. The reaction was allowed to stir at 60 °C for 30 min and was quenched by the addition of a saturated aqueous solution of ammonium chloride (3 drops). The resulting suspension was loaded directly onto a silica gel column and was purified via flash chromatography, eluting with 100:0 to 95:5 CH<sub>2</sub>Cl<sub>2</sub>:Et<sub>2</sub>O, to afford the title compound as a colorless oil (74 mg, 77%). Analytical data:  $[\alpha]_D^{25.7} +56.7$  (*c* = 0.16, CHCl<sub>3</sub>); <sup>1</sup>H NMR (500 MHz, CDCl<sub>3</sub>): δ 7.47-7.24 (m, 15H), 6.91 (dd, *J* = 9.6, 5.6 Hz, 1H), 6.02(d, *J* = 10.0 Hz, 1H), 5.77 (d, *J* = 16.4 Hz, 1H), 5.70 (dd, *J* = 15.2, 3.6 Hz, 1H), 5.58 (dd, *J* = 8.8, 2.0 Hz, 1H), 4.96 (t, *J* = 3.2 Hz, 1H), 4.12 (s, 2H), 3.78 (dd, *J* = 10.0, 2.4 Hz, 1H), 3.37 (ddd, *J* = 14.4, 9.6, 4.8 Hz, 1H), 3.12 (ddd, *J* = 15.2, 9.6, 4.8 Hz, 1H), 2.61 (d, *J* = 2.0 Hz, 1H), 2.35-2.01 (m, 4H), 1.80-1.56 (m, 1H), 1.39 (s, 3H), 1.30 (s, 3H), 1.20-1.05 (m, 1H), 0.81 (t, *J* = 7.6 Hz, 3H); <sup>13</sup>C NMR (100 MHz, CDCl<sub>3</sub>): δ 166.1, 163.6, 149.7, 144.2, 133.0, 128.6, 128.6, 127.7, 126.8, 124.7, 120.7, 108.3, 86.8, 82.5, 79.9, 79.2, 78.7, 74.7, 62.9, 59.8, 40.6, 39.0, 34.1, 34.0, 28.1, 26.3, 21.3, 10.8; **HRMS (ESI<sup>+</sup>)** Calcd. for C<sub>41</sub>H<sub>43</sub>ClO<sub>7</sub>+Cs, 815.1752; Found, 815.1796; **IR** (thin film, cm<sup>-1</sup>) 3434, 3019, 2849, 1737, 1658, 1442, 1331, 1215, 755, 668; **TLC**(50:50Hex:EtOAc): R<sub>f</sub> = 0.63.

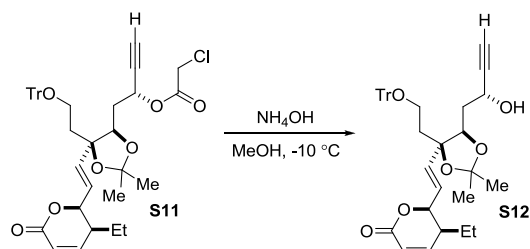

**(5S,6S)-5-ethyl-6-((E)-2-((4R,5S)-5-((R)-2-hydroxybut-3-yn-1-yl)-2,2-dimethyl-4-(2-(trityloxy)ethyl)-1,3-dioxolan-4-yl)vinyl)-5,6-dihydro-2H-pyran-2-one (S12):** A 20-mL scintillation vial equipped with magnetic stir bar was charged with chloroacetate **S11** (69 mg, 0.102 mmol, 1.0 equiv). MeOH (2 mL) was added, and the resulting solution was cooled to -10 °C in an acetone-ice bath. Saturated NH<sub>4</sub>OH (4 drops) was added, and the solution was allowed to stir at the same temperature for 10 min. The solution was diluted with Et<sub>2</sub>O and brine, and the layers were separated. The organic layer was washed successively with saturated aqueous NaHCO<sub>3</sub> and brine and dried with MgSO<sub>4</sub>. Concentration *in vacuo* yielded a colorless oil that was used without additional purification (59 mg, 96%). Analytical data:  $[\alpha]_D^{24.6} +53.3$  (*c* = 0.24,

CHCl<sub>3</sub>); <sup>1</sup>H NMR (400 MHz, CDCl<sub>3</sub>): δ 7.57-7.12 (m, 15H), 6.89 (dd, *J* = 8.8, 5.2 Hz, 1H), 6.00 (d, *J* = 9.6 Hz, 1H), 5.77 (d, *J* = 17.6 Hz, 1H), 5.70 (d, *J* = 16.4 Hz, 1H), 4.95 (s, 1H), 4.64 (br. s, 1H), 4.14 (d, *J* = 10.8), 3.37 (br. s, 1H), 3.12-2.94 (m, 2H), 2.52 (s, 1H), 2.31-2.11 (m, 1H), 2.07-1.72 (m, 4H), 1.40-1.36 (m, 1H), 1.40 (s, 3H), 1.36 (s, 3H), 1.17-1.05 (m, 1H), 0.80 (t, *J* = 7.6 Hz, 3H); <sup>13</sup>C NMR (100 MHz, CDCl<sub>3</sub>): δ 163.7, 149.7, 144.3, 133.1, 128.6, 127.6, 126.8, 124.6, 120.7, 108.5, 86.8, 83.9, 82.9, 79.9, 79.2, 73.2, 60.1, 59.9, 39.0, 35.3, 34.3, 28.1, 26.4, 21.3, 10.8; **HRMS (ESI<sup>+</sup>)** Calcd. for C<sub>39</sub>H<sub>42</sub>O<sub>6</sub>+Na, 629.2879; Found, 629.2990; **IR** (thin film, cm<sup>-1</sup>) 3435, 2390, 1936, 1786, 1723, 1630, 1426, 1212, 521; **TLC**(50:50Hex:EtOAc): R<sub>f</sub> = 0.48.

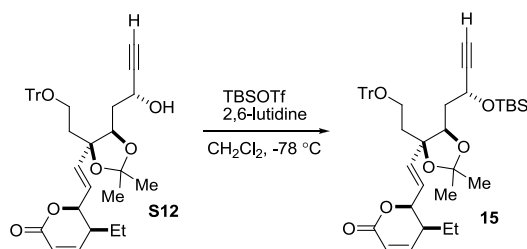

**(5*S*,6*S*)-6-((*E*)-2-((4*R*,5*S*)-5-((*R*)-2-((tert-butyldimethylsilyloxy)but-3-yn-1-yl)-2,2-dimethyl-4-(2-(trityloxy)ethyl)-1,3-dioxolan-4-yl)vinyl)-5-ethyl-5,6-dihydro-2*H*-pyran-2-one (15)**: An oven-dried and cooled 20-mL scintillation vial equipped with magnetic stir bar was charged with alcohol **S12** (59 mg, 0.098 mmol, 1.0 equiv). CH<sub>2</sub>Cl<sub>2</sub> (1.0 mL) was added, and the resulting solution was cooled to -78 °C in an acetone-dry ice bath. 2,6-lutidine (23 μL, 21 mg, 0.196 mmol, 2.0 equiv) was added, followed by a dropwise addition of TBSOTf (27 μL, 31 mg, 0.118 mmol, 1.2 equiv). The reaction was allowed to stir at the same temperature for 2 h, at which point it was quenched by the addition of MeOH (0.25 mL) and warmed to rt. After dilution with Et<sub>2</sub>O and 1M HCl, the layers were separated and the organic layer was washed with saturated aqueous NaHCO<sub>3</sub>, water, and brine and dried with MgSO<sub>4</sub>. The solvent was removed *in vacuo*, and the resulting crude oil was purified via flash chromatography, eluting with 100:0 to 80:20 hexanes:EtOAc, to afford the title compound as a colorless oil (59 mg, 84%). Analytical data: [α]<sub>D</sub><sup>25.1</sup> +41.2 (*c* = 0.20, CHCl<sub>3</sub>); <sup>1</sup>H NMR (400 MHz, CDCl<sub>3</sub>): δ 7.45-7.22 (m, 15H), 6.88 (dd, *J* = 9.6, 5.6 Hz, 1H), 6.00 (d, *J* = 9.6 Hz, 1H), 5.77-5.67 (m, 2H), 4.90 (t, *J* = 4.0 Hz, 1H), 4.54 (d, *J* = 10.0 Hz, 1H), 3.89 (dd, *J* = 10.4, 2.0 Hz, 1H), 3.39-3.31 (m, 1H), 3.15-3.09 (m, 1H), 2.45 (d, *J* = 2.0 Hz, 1H), 2.31-2.26 (m, 1H), 2.10-1.61 (m, 4H), 1.37 (s, 3H), 1.30 (s, 3H), 1.30-1.10 (m, 2H), 0.91 (s, 9H), 0.82 (t, *J* = 7.2 Hz, 3H), 0.18 (s, 3H), 0.13 (s, 3H); <sup>13</sup>C NMR (100 MHz, CDCl<sub>3</sub>): δ 163.6, 149.5, 144.4, 133.9, 128.6, 127.7, 126.8, 124.4, 120.9, 108.0, 86.8, 85.4, 82.6, 79.5, 79.0, 72.1, 60.0, 59.5, 39.3, 37.8, 34.4, 28.2, 26.5, 25.7, 21.3, 18.1, 10.9, -4.6, -5.3; **HRMS (ESI<sup>+</sup>)** Calcd. for C<sub>45</sub>H<sub>56</sub>O<sub>6</sub>Si+Cs, 853.2901; Found, 853.2925; **IR** (thin film, cm<sup>-1</sup>) 3435, 2917, 2848, 2393, 2002, 1725, 1611, 1530, 1381, 1218, 1060, 707; **TLC**(50:50Hex:EtOAc): R<sub>f</sub> = 0.83.

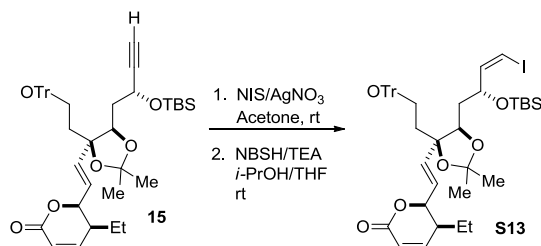

**(5*S*,6*S*)-6-((*E*)-2-((4*R*,5*S*)-5-((*R*,*Z*)-2-((tert-butyl)dimethylsilyloxy)-4-iodobut-3-en-1-yl)-2,2-dimethyl-4-(2-(trityloxy)ethyl)-1,3-dioxolan-4-yl)vinyl)-5-ethyl-5,6-dihydro-2*H*-pyran-2-one (S13):** An oven-dried and cooled 20-mL scintillation vial equipped with magnetic stir bar was charged with alkyne **15** (54 mg, 0.076 mmol, 1.0 equiv), NIS (20 mg, 0.091 mmol, 1.2 equiv), and THF (2.0 mL). AgNO<sub>3</sub> (powdered, cat.) was added, and the resulting suspension was stirred vigorously in the dark at rt for 12 h. The suspension was filtered through a short SiO<sub>2</sub> plug, eluting with 100:0 to 75:25 hexanes:EtOAc, to afford the crude alkynyl iodide as a light yellow oil (57 mg, 90% crude yield) that was used without additional purification.

An oven-dried and cooled 20-mL scintillation vial equipped with magnetic stir bar was charged with the crude iodide (57 mg, 0.068 mmol, 1.0equiv), *i*PrOH (2.0 mL), and THF (2.0 mL). The vial was purged with N<sub>2</sub>, and TEA (29  $\mu$ L, 21 mg, 0.204 mmol, 3.0 equiv) and NBSH (25 mg, 0.116 mmol, 1.7equiv) were added successively. The vial was sealed with a Teflon-lined cap and covered with foil, and the reaction was allowed to stir at rt for 16 h. <sup>1</sup>H NMR analysis of an aliquot revealed complete consumption of the starting material, and the reaction was concentrated *in vacuo*. The resulting crude yellow oil was purified via column chromatography, eluting with 100:0 to 70:30 petroleum ether:Et<sub>2</sub>O, to afford the title compound as a colorless oil (54 mg, 85% over two steps). Analytical data:  $[\alpha]_D^{23.8} +33.6$  ( $c = 0.23$ , CHCl<sub>3</sub>); <sup>1</sup>H NMR (400 MHz, CDCl<sub>3</sub>):  $\delta$  7.54-7.06 (m, 15H), 6.87 (dd,  $J = 9.6, 5.2$  Hz, 1H), 6.27-6.21 (m, 2H), 5.98 (d,  $J = 10.0$  Hz, 1H), 5.74-5.63 (m, 2H), 4.90 (t,  $J = 4.0$  Hz, 1H), 4.53 (m, 1H), 3.89 (d,  $J = 10.0$  Hz, 1H), 3.35-3.31 (m, 1H), 3.09-3.06 (m, 1H), 2.27 (dd,  $J = 9.6, 4.8$  Hz, 1H), 2.04 (ddd,  $J = 4.4, 4.0, 4.0$  Hz, 1H), 1.71-1.49 (m, 4H), 1.38-1.05 (m, 2H), 1.37 (s, 3H), 1.30 (s, 3H), 0.86 (s, 9H), 0.78 (t,  $J = 7.6$  Hz, 3H), 0.09 (s, 3H), 0.06 (s, 3H); <sup>13</sup>C NMR (100 MHz, CDCl<sub>3</sub>):  $\delta$  163.7, 149.6, 144.4, 133.9, 128.6, 127.6, 126.8, 124.1, 120.8, 107.9, 86.8, 82.7, 79.8, 79.5, 79.0, 72.8, 60.1, 39.2, 35.3, 34.2, 28.3, 26.6, 25.7, 25.7, 21.3, 18.0, 10.9, -4.3, -4.9; HRMS (ESI<sup>+</sup>) Calcd. for C<sub>45</sub>H<sub>57</sub>IO<sub>6</sub>Si+Cs, 981.2024; Found, 981.2055; IR (thin film, cm<sup>-1</sup>) 3435, 2956, 2928, 2855, 1726, 1675, 1612, 1379, 1251, 1063, 835, 705; TLC(50:50 Et<sub>2</sub>O:Petroleum Ether): R<sub>f</sub> = 0.63.

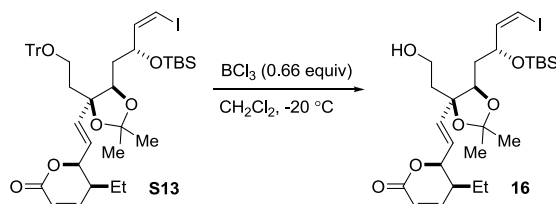

**(5*S*,6*S*)-6-((*E*)-2-((4*R*,5*S*)-5-((*R*,*Z*)-2-((tert-butyl)dimethylsilyloxy)-4-iodobut-3-en-1-yl)-4-(2-hydroxyethyl)-2,2-dimethyl-1,3-dioxolan-4-yl)vinyl)-5-ethyl-5,6-dihydro-2*H*-pyran-2-one (16):** An oven-dried and cooled 20-mL scintillation vial was charged with vinyl iodide **S13** (40 mg, 0.048 mmol, 1.0 equiv) and CH<sub>2</sub>Cl<sub>2</sub> (8.0 mL). The resulting solution was cooled to -20 °C

in an acetone-dry ice bath, and  $\text{BCl}_3$  (0.123 M in  $\text{CH}_2\text{Cl}_2$ , 2.6 mL, 0.031 mmol, 0.66 equiv) was added dropwise. A bright yellow color was initially observed but disappeared during the course of the reaction. The reaction was allowed to stir at the same temperature for 30 min and was quenched by the addition of saturated aqueous  $\text{NaHCO}_3$  (1.0 mL). The resulting suspension was warmed to rt, and the layers were separated. The organic layer was dried with  $\text{Na}_2\text{SO}_4$  and concentrated *in vacuo* to afford a colorless oil that was purified via column chromatography, eluting with 70:30 to 50:50 petroleum ether: $\text{Et}_2\text{O}$ , to afford the title compound (16 mg, 56%) as a 5:1 mixture of diastereomers. The diastereomers were separated via HPLC to afford diastereomerically pure material, whose spectral data were consistent with those reported in the literature for the title compound.<sup>3</sup> Analytical data:  $[\alpha]_{\text{D}}^{25.3} +64.5$  ( $c = 0.14$ ,  $\text{CHCl}_3$ ), lit:<sup>3</sup>  $[\alpha]_{\text{D}}^{22.0} +68.6$  ( $c = 1.60$ ,  $\text{CHCl}_3$ );  **$^1\text{H NMR}$**  (400 MHz,  $\text{CDCl}_3$ ):  $\delta$  6.99 (dd,  $J = 9.6, 5.2$  Hz, 1H), 6.25-6.19 (m, 2H), 6.07 (d,  $J = 10.0$  Hz, 1H), 5.95 (dd,  $J = 15.2, 4.4$  Hz, 1H), 5.87 (d,  $J = 15.6$  Hz, 1H), 5.05 (t,  $J = 4.0$  Hz, 1H), 4.54 (ddd,  $J = 16.8, 9.6, 2.8$  Hz, 1H), 4.01 (d,  $J = 10.0$  Hz, 1H), 3.83 (dt,  $J = 11.2, 3.6$  Hz, 1H), 3.70 (m, 1H), 2.66 (br s, 1H), 2.43 (dd,  $J = 9.2, 4.8$  Hz, 1H), 2.02 (ddd,  $J = 14.4, 9.6, 5.6$  Hz, 1H), 1.71-1.42(m, 6H), 1.54 (s, 3H), 1.37 (s, 3H), 0.96 (t,  $J = 7.6$  Hz, 3H), 0.86 (s, 9H), 0.08 (s, 3H), 0.05 (s, 3H);  **$^{13}\text{C NMR}$**  (100 MHz,  $\text{CDCl}_3$ ):  $\delta$  163.9, 150.0, 144.3, 133.2, 125.0, 120.9, 108.4, 85.1, 80.1, 79.5, 78.8, 72.7, 59.7, 39.2, 35.3, 35.2, 28.2, 26.4, 25.8, 21.5, 18.0, 11.0, -4.2, -4.9; **HRMS (ESI<sup>+</sup>)** Calcd. for  $\text{C}_{26}\text{H}_{43}\text{IO}_6\text{Si}+\text{Na}$ , 629.1772; Found, 629.1771; **IR** (thin film,  $\text{cm}^{-1}$ ) 3434, 2390, 2083, 1936, 1785, 1709, 1641, 1427, 1250, 1081, 780, 507; **TLC**(50:50Hex:EtOAc):  $R_f = 0.32$ .

---

<sup>3</sup> (a) Miyashita, K.; Tsunemi, T.; Hosokawa, T.; Ikejiri, M.; Imanishi, T. *Tetrahedron Lett.* **2007**, 48, 3829. (b) Miyashita, K.; Tsunemi, T.; Hosokawa, T.; Ikejiri, M.; Imanishi, T. *J. Org. Chem.* **2008**, 73, 5360.

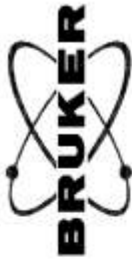

Report Data Parameters  
 NAME: BRUK1-Receher1  
 EXPTNO: 1  
 PROCNO: 1  
 F2 - Acquisition Parameters  
 Da- 200MHz/27  
 F1- 14.76  
 INSTRUM: spect  
 PULPROG: zgpg30  
 PC: 62508  
 ACQRES: 1.2  
 NS: 2  
 DS: 4  
 SSB: 7507.507 Hz  
 FIDRES: 3.114555 Hz  
 Aq: 8.13517475 sec  
 RG: 64.6457  
 DR: 1.000 sec  
 DE: 332.0 K  
 D1: 1.00000000 sec  
 D11: 1.00000000 sec  
 =====  
 Processing Parameters  
 SI: 32768  
 SF: 500.1350142 MHz  
 SWH: 4999.999999 MHz  
 SSB: 0  
 GB: 0  
 PC: 1.00

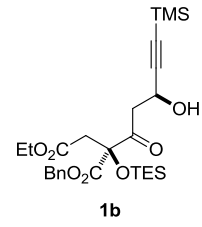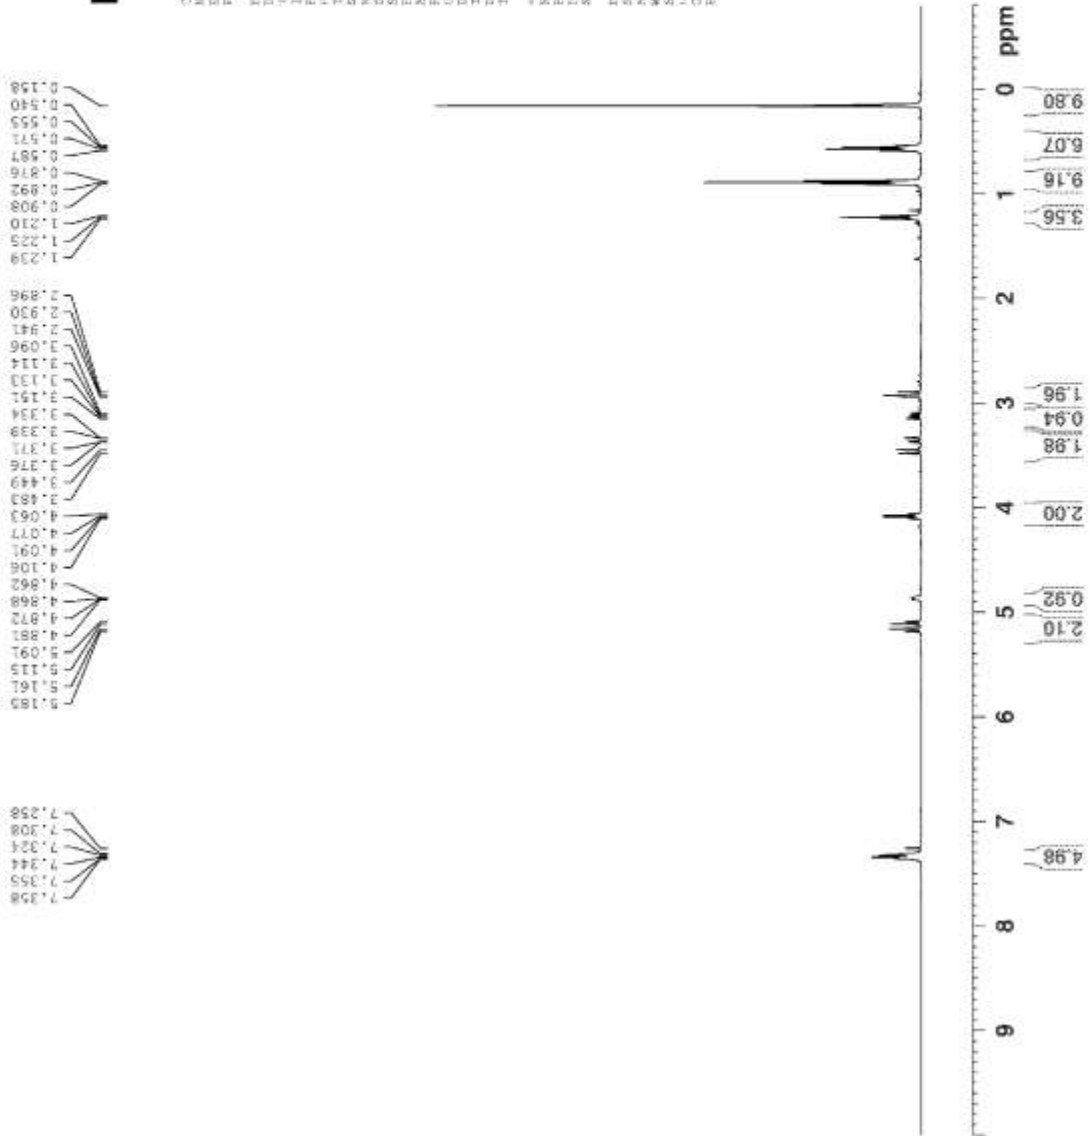

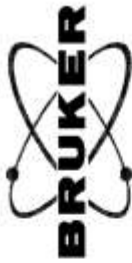

Questart Data Parameters  
NAME: 860X1-Res2rec13  
EXPTNO: 1  
PROCNO: 1  
F2 - Acquisition Parameters  
Date\_ Time: 20090101 16:07  
INSTRUM: spect  
PROBHD: 5 mm EASYC BB7  
PULPROG: zgpg30  
ZC: zgpg30  
SOLVENT: CDCl3  
NS: 2  
DS: 4  
SWH: 50581.019 Hz  
FIDRES: 0.468830 Hz  
AQ: 1.0715436 sec  
RG: 30788  
DQ: 16.350  
WALTZ16: 251.4 KHz  
NUC1: 13C  
NUC2: 13C  
P1: 6.50 sec  
PC: 6.00 sec  
SFO1: 125.7705462 MHz  
F2 - Processing parameters  
Date\_ Time: 20090101 16:07  
INSTRUM: spect  
PROBHD: 5 mm EASYC BB7  
PULPROG: zgpg30  
SOLVENT: CDCl3  
SFO1: 125.7705462 MHz  
F2 - Processing parameters  
Date\_ Time: 20090101 16:07  
INSTRUM: spect  
PROBHD: 5 mm EASYC BB7  
PULPROG: zgpg30  
SOLVENT: CDCl3  
SFO1: 125.7705462 MHz

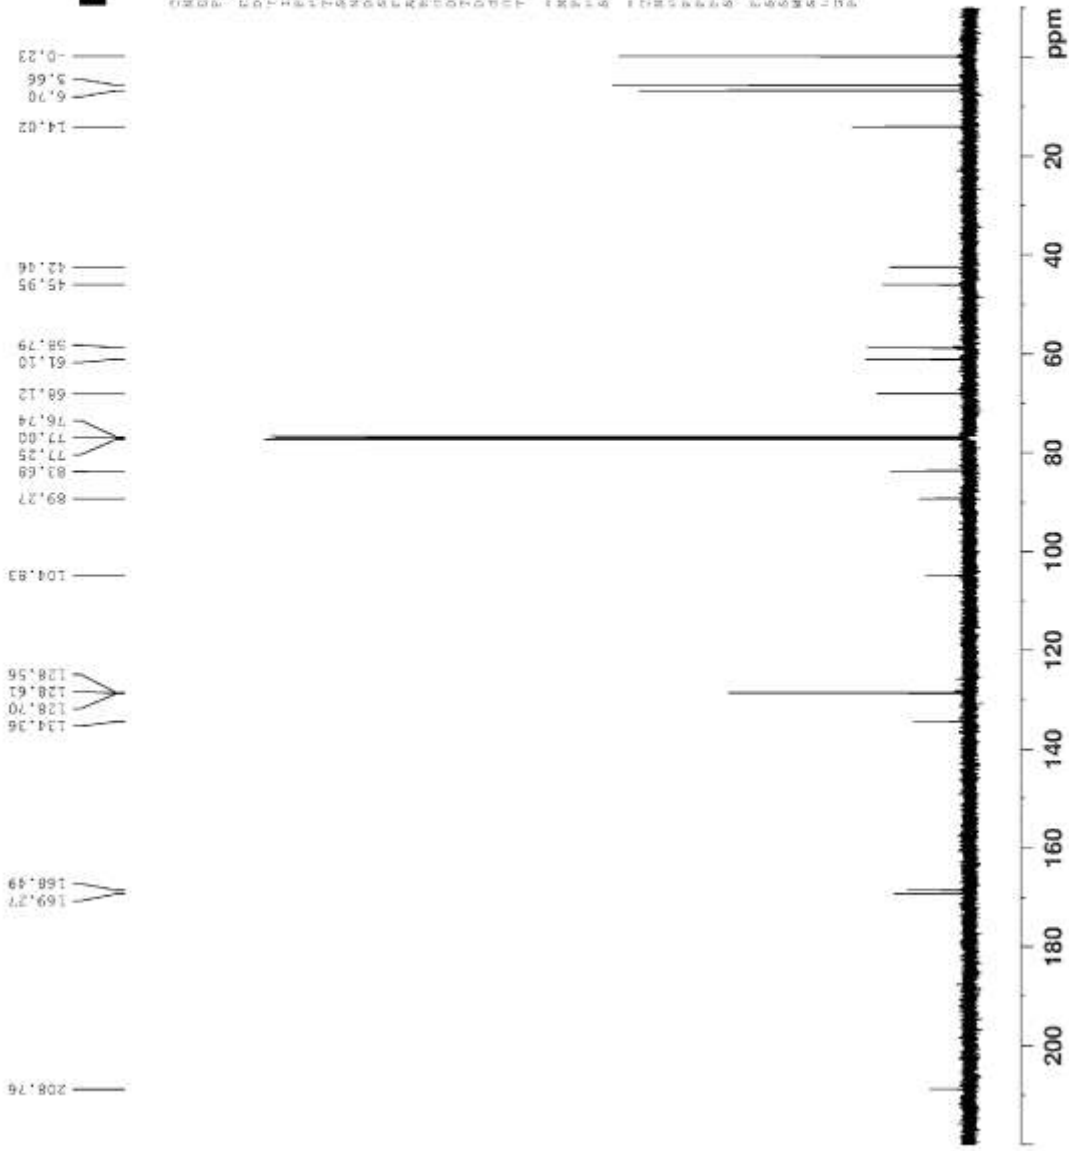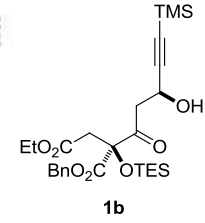

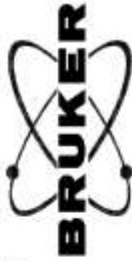

Current Data Parameters  
 NAME: S02X1-L38-prod  
 EXNO: 1  
 F2 (Hz): 500.1361716  
 F2 - Acquisition Parameters  
 Date\_ : 20090122  
 Time : 11.04  
 INSTRUM : spect  
 FRONTM : 5 mm PABAC 007  
 PULPROG : zgpg30  
 TC : 300.2  
 SOLVENT : CDCl3  
 NS : 0  
 DS : 4  
 SWH : 1507.907 Hz  
 EQ : 0.114955 Es  
 FIDRES : 0.3467975 Hz  
 AQ : 32  
 RG : 66,660 LANC  
 SI : 32768  
 SF : 200.1361716 MHz  
 DQ : 1.0000000 sec  
 TD : 1  
 ===== CF MANT1, (F) =====  
 SFO1 : 12.0000000 sec  
 SFO2 : 12.0000000 sec  
 SFO3 : 12.0000000 sec  
 SFO4 : 12.0000000 sec  
 SFO5 : 12.0000000 sec  
 SFO6 : 12.0000000 sec  
 SFO7 : 12.0000000 sec  
 SFO8 : 12.0000000 sec  
 SFO9 : 12.0000000 sec  
 SFO10 : 12.0000000 sec  
 SFO11 : 12.0000000 sec  
 SFO12 : 12.0000000 sec  
 SFO13 : 12.0000000 sec  
 SFO14 : 12.0000000 sec  
 SFO15 : 12.0000000 sec  
 SFO16 : 12.0000000 sec  
 SFO17 : 12.0000000 sec  
 SFO18 : 12.0000000 sec  
 SFO19 : 12.0000000 sec  
 SFO20 : 12.0000000 sec  
 SFO21 : 12.0000000 sec  
 SFO22 : 12.0000000 sec  
 SFO23 : 12.0000000 sec  
 SFO24 : 12.0000000 sec  
 SFO25 : 12.0000000 sec  
 SFO26 : 12.0000000 sec  
 SFO27 : 12.0000000 sec  
 SFO28 : 12.0000000 sec  
 SFO29 : 12.0000000 sec  
 SFO30 : 12.0000000 sec  
 SFO31 : 12.0000000 sec  
 SFO32 : 12.0000000 sec  
 SFO33 : 12.0000000 sec  
 SFO34 : 12.0000000 sec  
 SFO35 : 12.0000000 sec  
 SFO36 : 12.0000000 sec  
 SFO37 : 12.0000000 sec  
 SFO38 : 12.0000000 sec  
 SFO39 : 12.0000000 sec  
 SFO40 : 12.0000000 sec  
 SFO41 : 12.0000000 sec  
 SFO42 : 12.0000000 sec  
 SFO43 : 12.0000000 sec  
 SFO44 : 12.0000000 sec  
 SFO45 : 12.0000000 sec  
 SFO46 : 12.0000000 sec  
 SFO47 : 12.0000000 sec  
 SFO48 : 12.0000000 sec  
 SFO49 : 12.0000000 sec  
 SFO50 : 12.0000000 sec  
 SFO51 : 12.0000000 sec  
 SFO52 : 12.0000000 sec  
 SFO53 : 12.0000000 sec  
 SFO54 : 12.0000000 sec  
 SFO55 : 12.0000000 sec  
 SFO56 : 12.0000000 sec  
 SFO57 : 12.0000000 sec  
 SFO58 : 12.0000000 sec  
 SFO59 : 12.0000000 sec  
 SFO60 : 12.0000000 sec  
 SFO61 : 12.0000000 sec  
 SFO62 : 12.0000000 sec  
 SFO63 : 12.0000000 sec  
 SFO64 : 12.0000000 sec  
 SFO65 : 12.0000000 sec  
 SFO66 : 12.0000000 sec  
 SFO67 : 12.0000000 sec  
 SFO68 : 12.0000000 sec  
 SFO69 : 12.0000000 sec  
 SFO70 : 12.0000000 sec  
 SFO71 : 12.0000000 sec  
 SFO72 : 12.0000000 sec  
 SFO73 : 12.0000000 sec  
 SFO74 : 12.0000000 sec  
 SFO75 : 12.0000000 sec  
 SFO76 : 12.0000000 sec  
 SFO77 : 12.0000000 sec  
 SFO78 : 12.0000000 sec  
 SFO79 : 12.0000000 sec  
 SFO80 : 12.0000000 sec  
 SFO81 : 12.0000000 sec  
 SFO82 : 12.0000000 sec  
 SFO83 : 12.0000000 sec  
 SFO84 : 12.0000000 sec  
 SFO85 : 12.0000000 sec  
 SFO86 : 12.0000000 sec  
 SFO87 : 12.0000000 sec  
 SFO88 : 12.0000000 sec  
 SFO89 : 12.0000000 sec  
 SFO90 : 12.0000000 sec  
 SFO91 : 12.0000000 sec  
 SFO92 : 12.0000000 sec  
 SFO93 : 12.0000000 sec  
 SFO94 : 12.0000000 sec  
 SFO95 : 12.0000000 sec  
 SFO96 : 12.0000000 sec  
 SFO97 : 12.0000000 sec  
 SFO98 : 12.0000000 sec  
 SFO99 : 12.0000000 sec  
 SFO100 : 12.0000000 sec

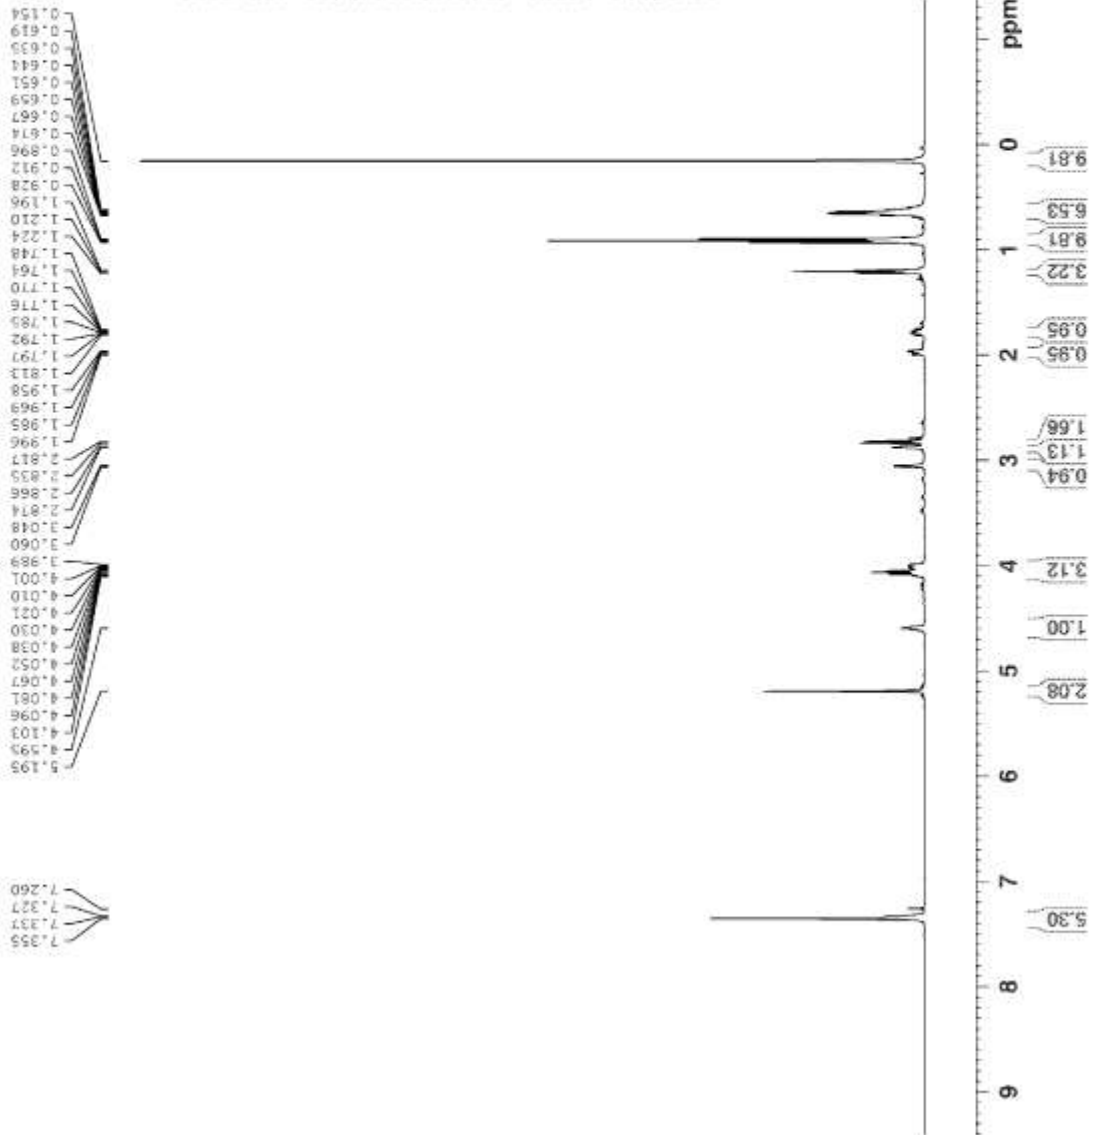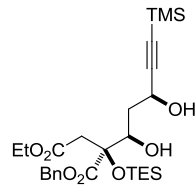



```

Current: Hsks_Fragments
NAME: 20031-119-0001
EXPNO: 1
PROCNO: 1

FE - Acquisition Parameters
Date_ 20090722
Time 11:09
INSTRUM spect
PROBHD 5 mm TARGA
PULPROG zgpg30
TE 300.2
SOLVENT CDCl3
NS 178
DS 4
SWH 30281.019 H
FIDRES 0.46650 H
AQ 1.071729 s
RG 327.9
SR 16.350 u
SE 6.000 u
SF 500.132005 M
T1 1.0000000 s
d11 0.0500000 s
T1R16 0.8999999 s
T1R 1

===== CHANNEL f1 =====
NUC1 13C
P1 7.00 u
PL1 0.00 dB
SFO1 125.7695452 M

===== CHANNEL f2 =====
CPDPRG2 waltz16
NUC2 13C
P2 7.00 u
PL2 0.00 dB
PL12 10.00 dB
PL13 10.00 dB
PL14 10.00 dB
SFO2 500.132005 M

F2 - Processing parameters
SI 65528
SF 125.7695452 M
WDW EM
SSB 0
LB 0
GB 0
PC 1.00
  
```

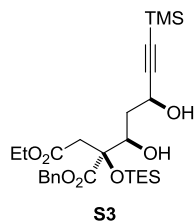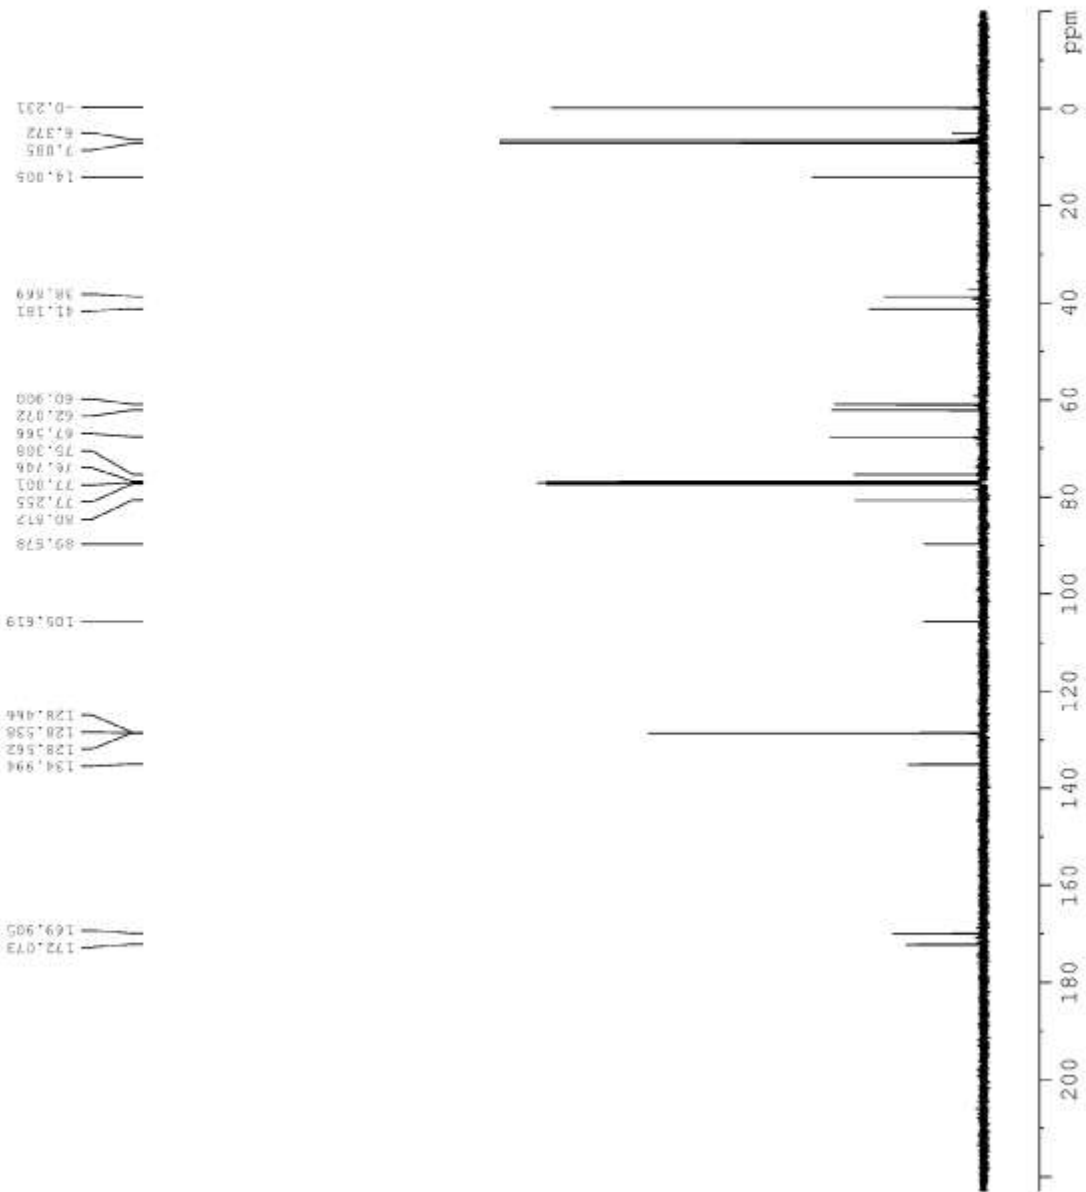





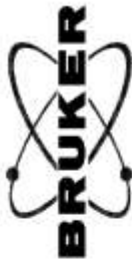

Current Data Parameters  
 NAME: 3XSM1-164-BJ  
 EXPOC: 1  
 PROCNO: 1  
 F2 - Acquisition Parameters  
 Date\_ Time: 20090713 16:27  
 INSTRUM: spect  
 PRGNAME: 3xsm164c.mv  
 PULPROG: zgpg30  
 TC: 65524  
 SOLVENT: CDCl3  
 NS: 0  
 DS: 4  
 SWH: 1507.907 Hz  
 FIDRES: 0.114945 Hz  
 AQ: 4.3467975 sec  
 RG: 101.2  
 GW: 66.660 MHz  
 ZF2: 282.4 MHz  
 TD: 1  
 1.00000000 sec  
 ===== CHANNEL f1 =====  
 NUCL1: 13C  
 P1: 12.000 sec  
 PL1: 0.00 dB  
 SFO1: 100.626155 MHz  
 ===== CHANNEL f2 =====  
 F2 - Processing parameters  
 SI: 32768  
 SF: 500.136115 MHz  
 EQ2: 0  
 SFO2: 0.00 MHz  
 GB: 0.00 Hz  
 PC: 1.000

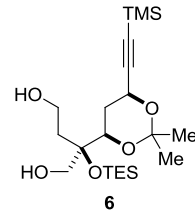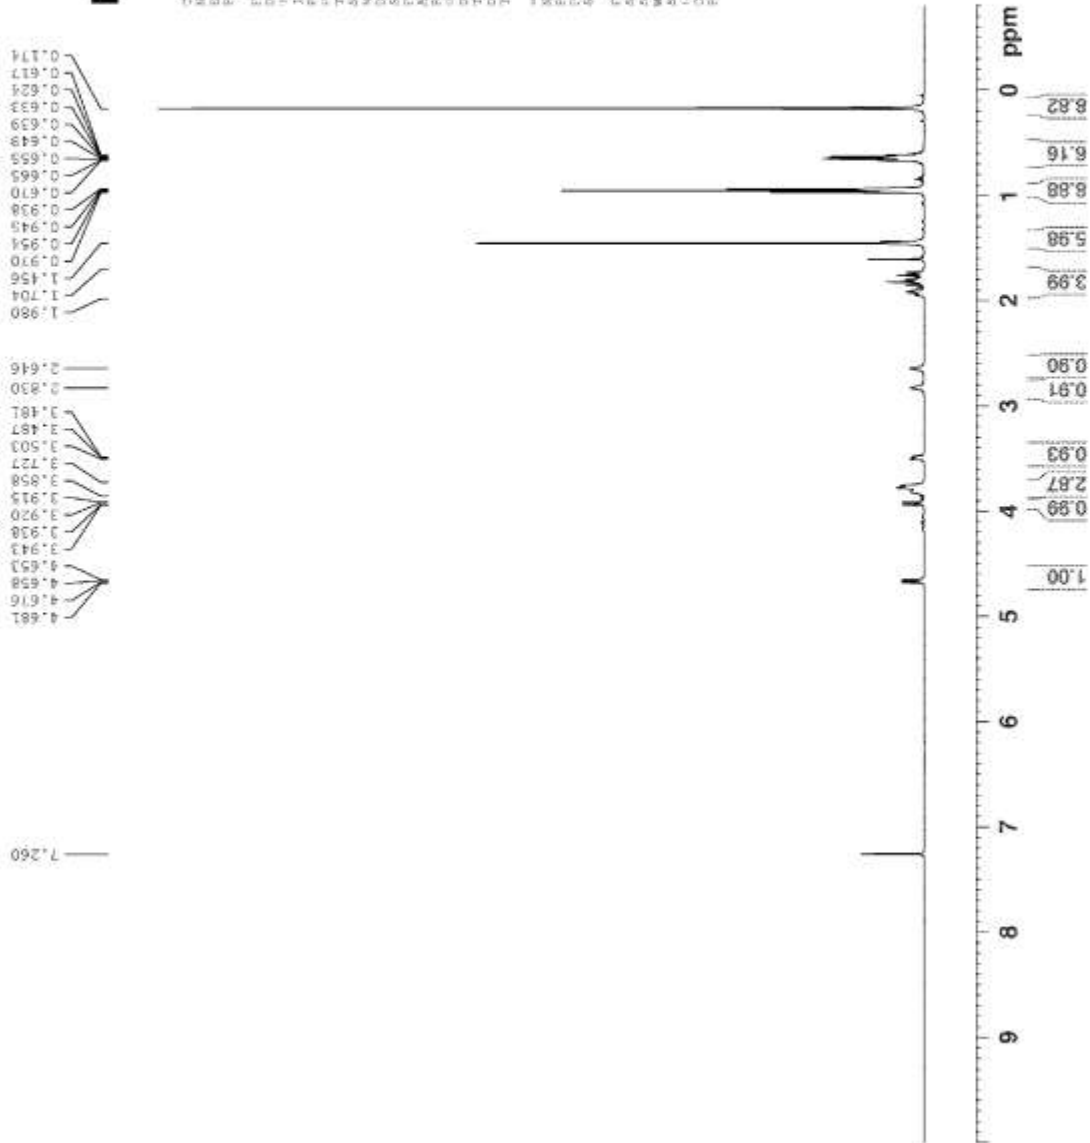

SNGXI-169-C13

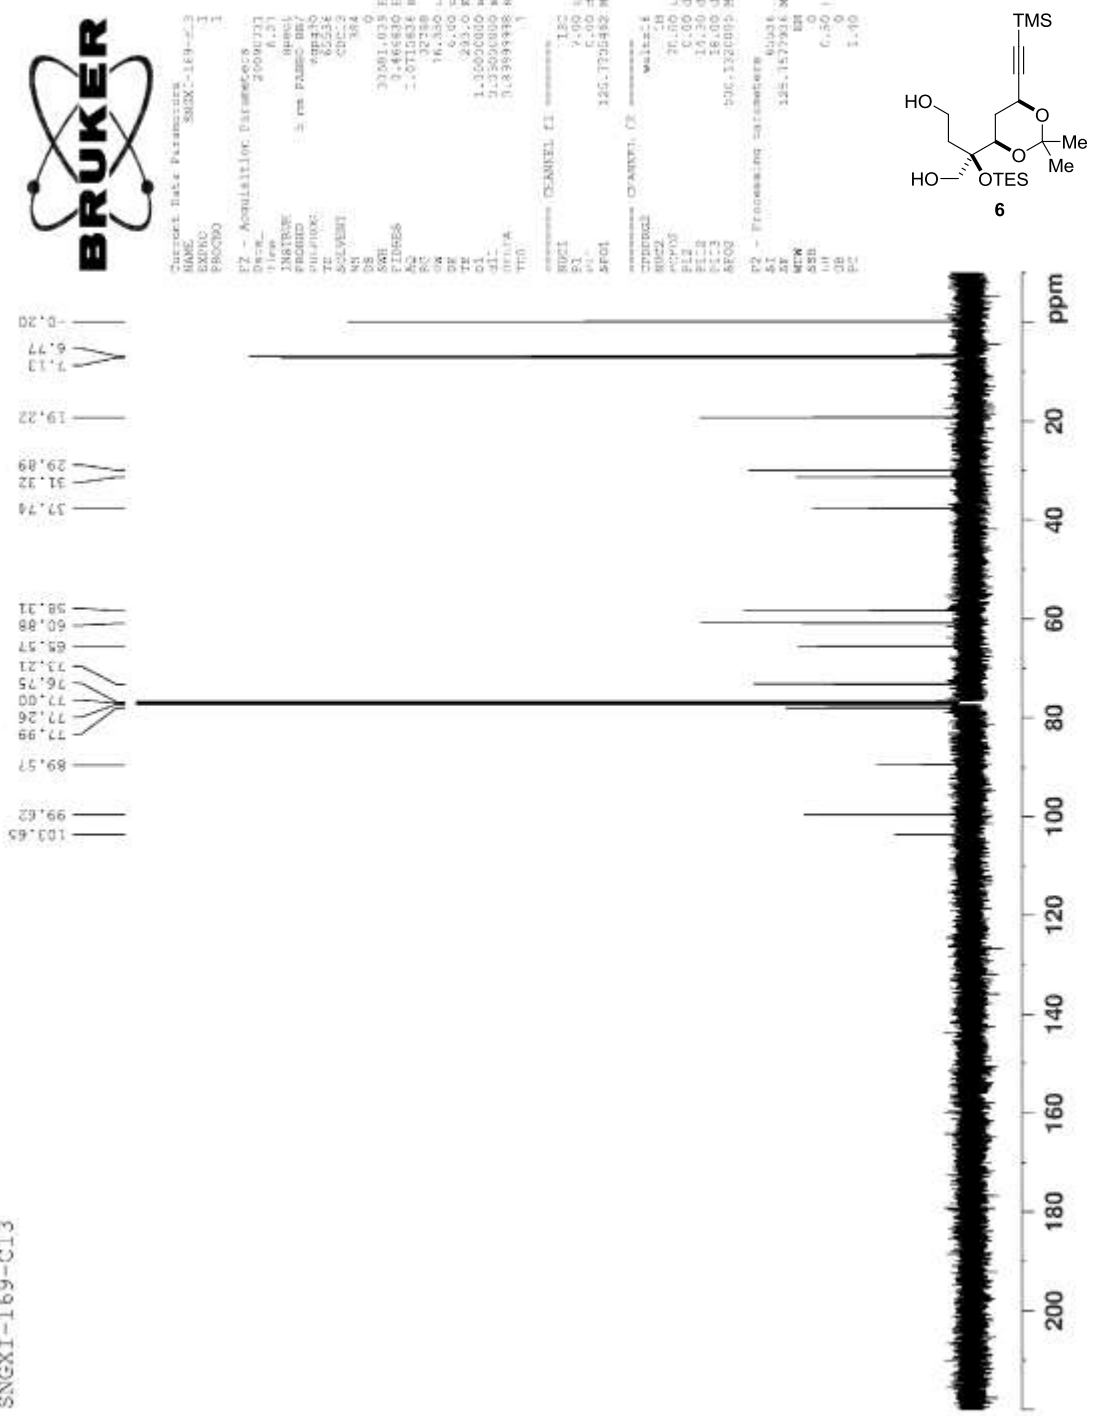





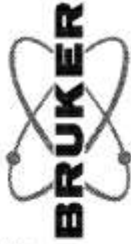

Current Data Parameters  
NAME 6H  
EXPNO 1  
PROCNO 1

F2 - Acquisition Parameters

Date\_ 20090731  
Time 17.58  
INSTRUM spect  
PROBHD 5 mm TXI 13C Z  
PULPROG zgpg  
TD 32768  
SOLVENT CDCl3  
NS 16  
DS 0  
SWH 5341.880 Hz  
FIDRES 0.163021 Hz  
AQ 3.0671349 sec  
RG 71.8  
DM 93.600 usec  
DE 6.00 usec  
TE 446.5 K  
D1 1.00000000 sec  
TDC 1

CHANNEL f1

NUC1 1H  
P1 10.50 usec  
PL1 0 dB  
SFO1 400.0923618 MHz

F2 - Processing parameters

SF 400.0900048 MHz  
WDW EM  
SSB 0  
LB 0.25 Hz  
GB 0  
PC 1.00

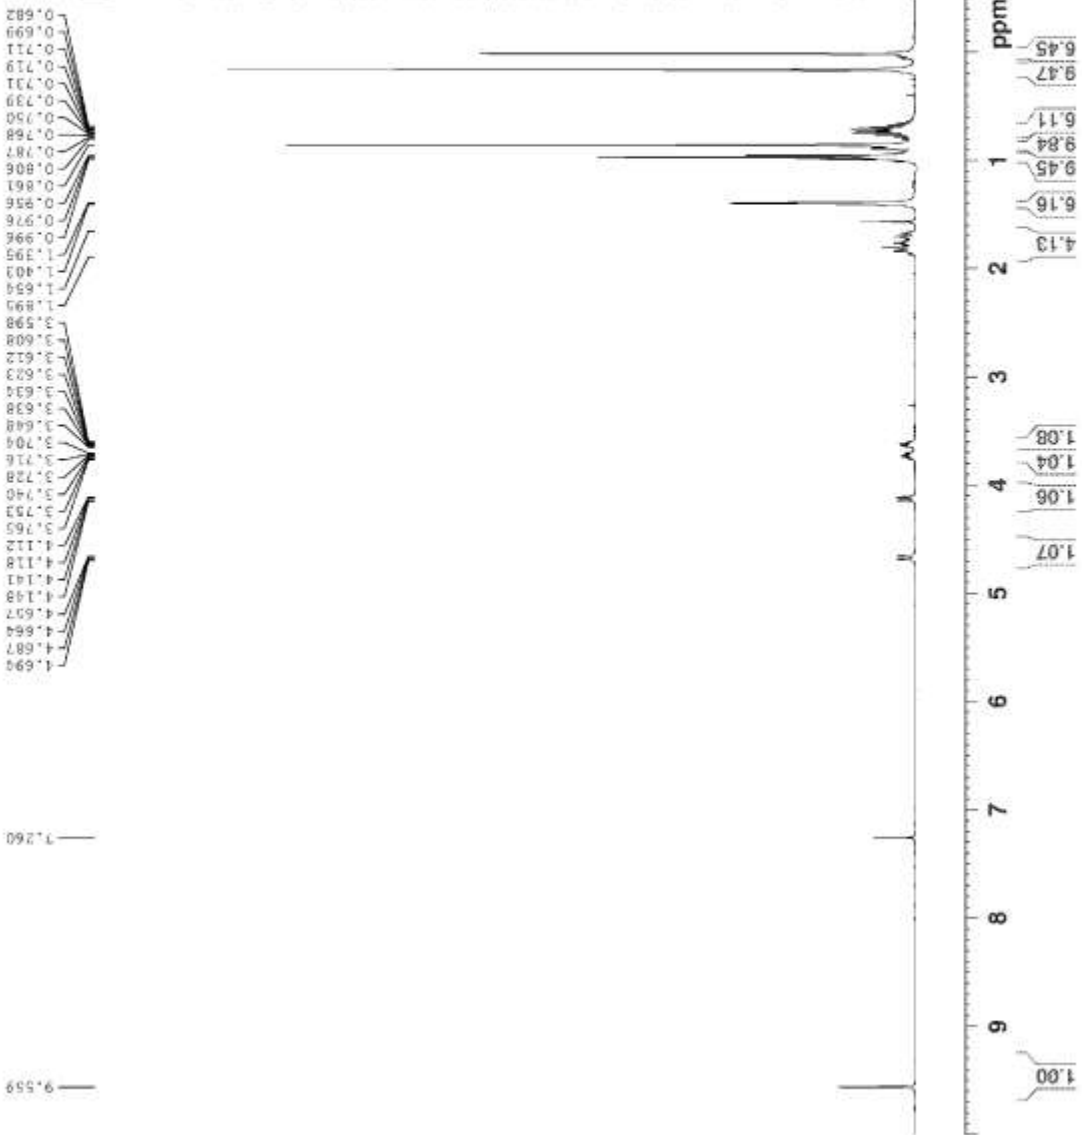



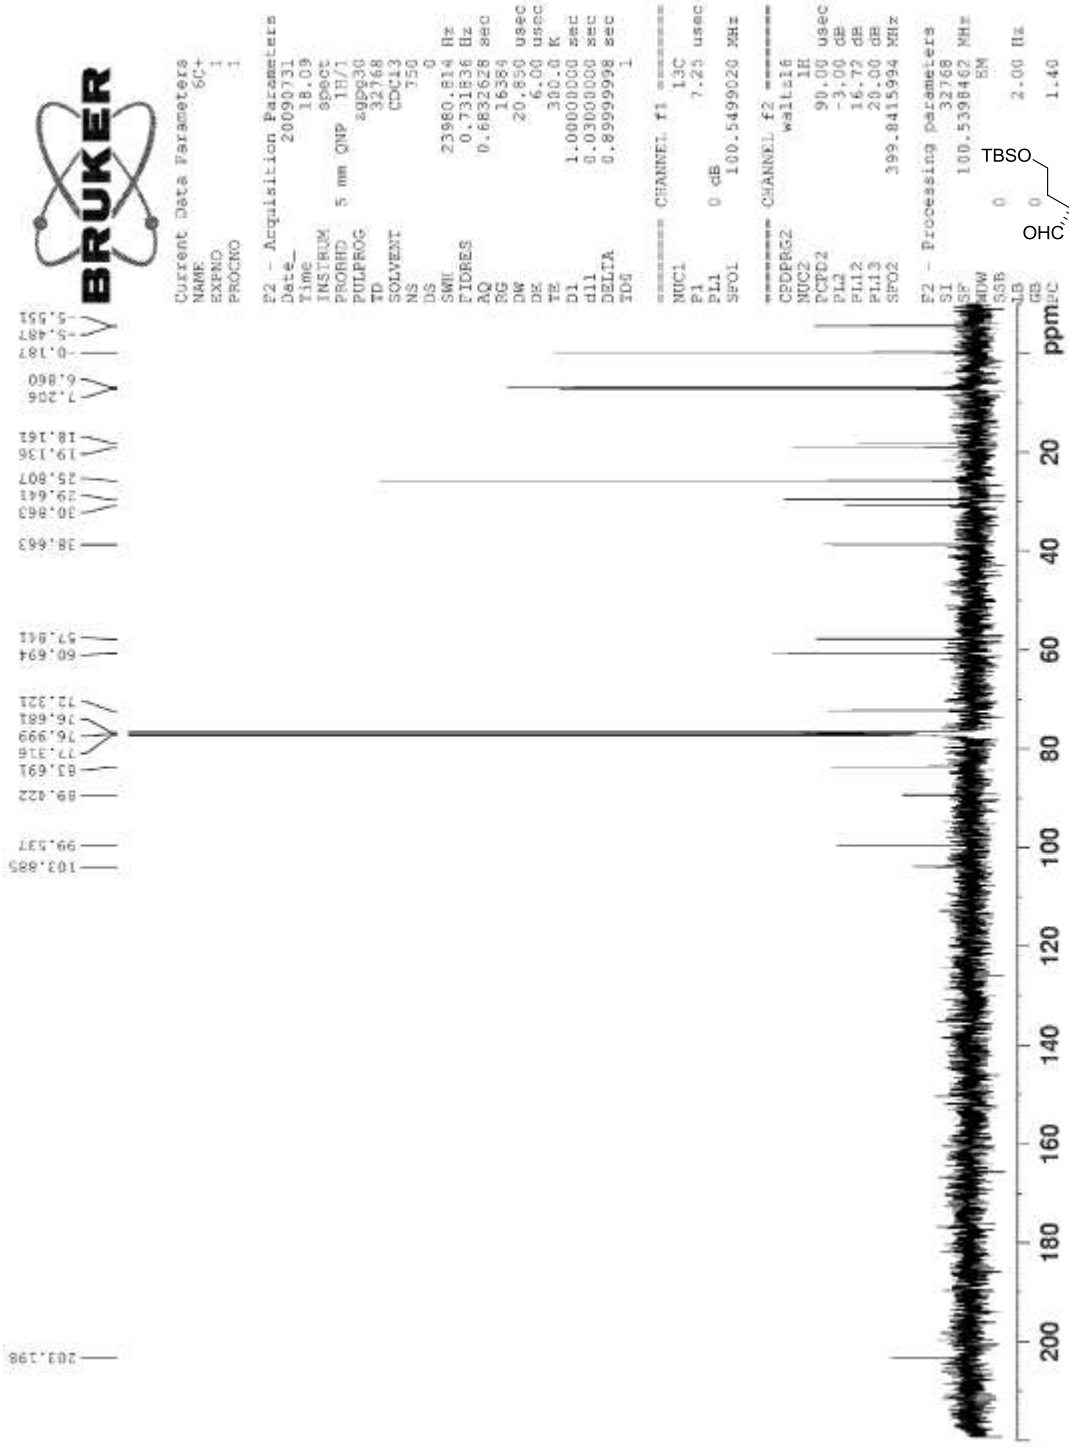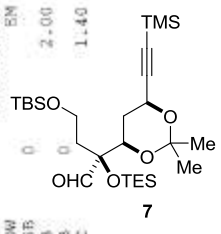

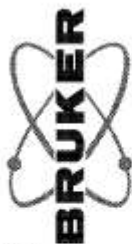

Current Data Parameters  
 NAME 7H  
 EXPNO 1  
 PROCNO 1

F2 - Acquisition Parameters  
 Date\_ 20090801  
 Time 9.28  
 INSTRUM spect  
 PROBRD 5 mm TXI 13C Z  
 PULPROG zg30  
 TD 32768  
 FID CDC13  
 NS 16  
 DS 0  
 SWH 5341.880 Hz  
 FIDRES 0.163021 Hz  
 AQ 3.0671349 sec  
 RG 71.8  
 DW 93.600 usec  
 DE 6.00 usec  
 TE 470.5 K  
 D1 1.00000000 sec  
 TDO 1

===== CHANNEL f1 =====  
 NUCL1 1H  
 P1 10.50 usec  
 PL1 0 dB  
 SFO1 400.0923618 MHz

F2 - Processing parameters  
 SI 32768  
 SF 400.0900050 MHz  
 WDW EM  
 SSB 0  
 LB 0.25 Hz  
 GB 0  
 PC 1.00

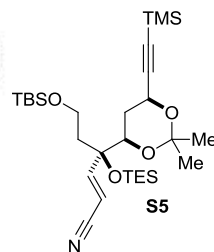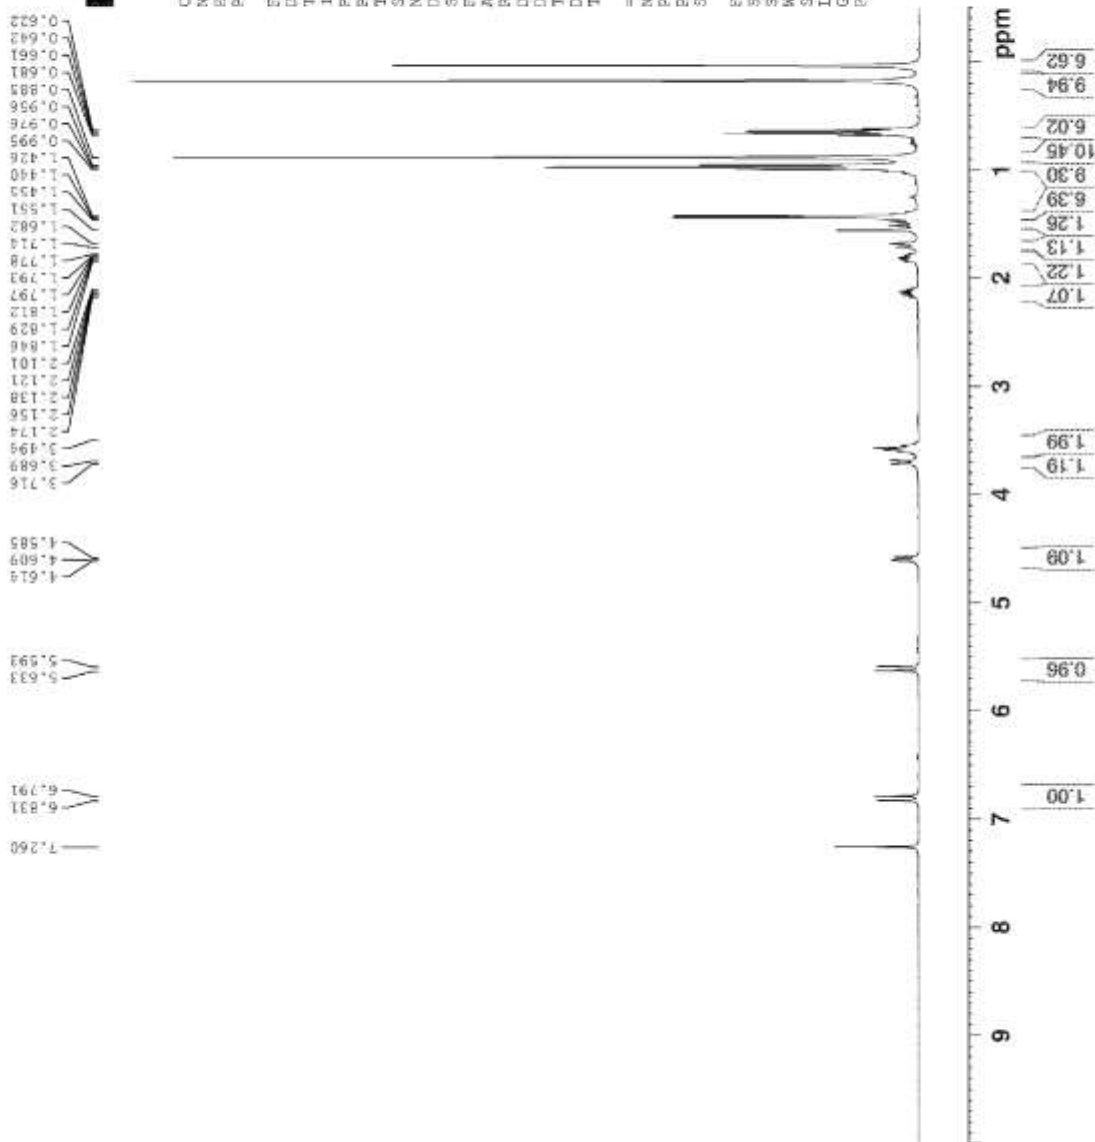



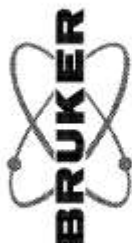

Current Data Parameters  
NAME SH  
EXPNO 1  
PROCNO 1

F2 - Acquisition Parameters

Date\_ 20090625  
Time 8.48  
INSTRUM spect  
PROBHD 5 mm QNP 1H/1  
PULPROG zg30  
TD 32768  
SOLVENT CDCl3  
NS 16  
DS 0  
SWH 6218.905 Hz  
FIDRES 0.189786 Hz  
AQ 2.6345973 sec  
RG 57  
DW 80.400 usec  
DE 6.00 usec  
TE 300.0 K  
D1 1.00000000 sec  
TD0 1

===== CHANNEL f1 =====  
NUC1 1H  
PI 9.30 usec  
PL1 -3.00 dB  
SFO1 399.8424924 MHz

F2 - Processing parameters  
SI 32768  
SF 399.840077 MHz  
WDW EM  
SSB 0  
LB 0.30 Hz  
GB 0  
PC 1.00

0.642  
0.661  
0.681  
0.682  
0.693  
0.912  
0.992  
1.442  
1.481  
1.513  
1.545  
1.574  
1.740  
1.773  
1.849  
1.851  
1.870  
1.884  
1.884  
1.898  
1.904  
1.918  
2.127  
2.147  
2.169  
2.183  
2.200  
3.533  
3.533  
3.759  
3.785  
3.788  
4.598  
4.598  
4.603  
4.628  
4.632  
5.415  
5.445  
6.266  
6.286  
6.305  
6.325  
6.860  
6.899  
7.260  
9.589  
9.609

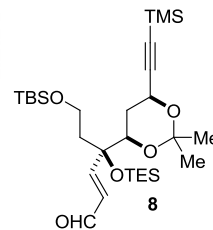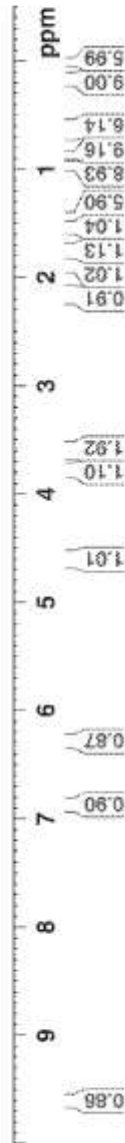

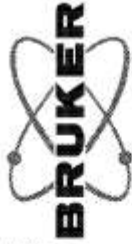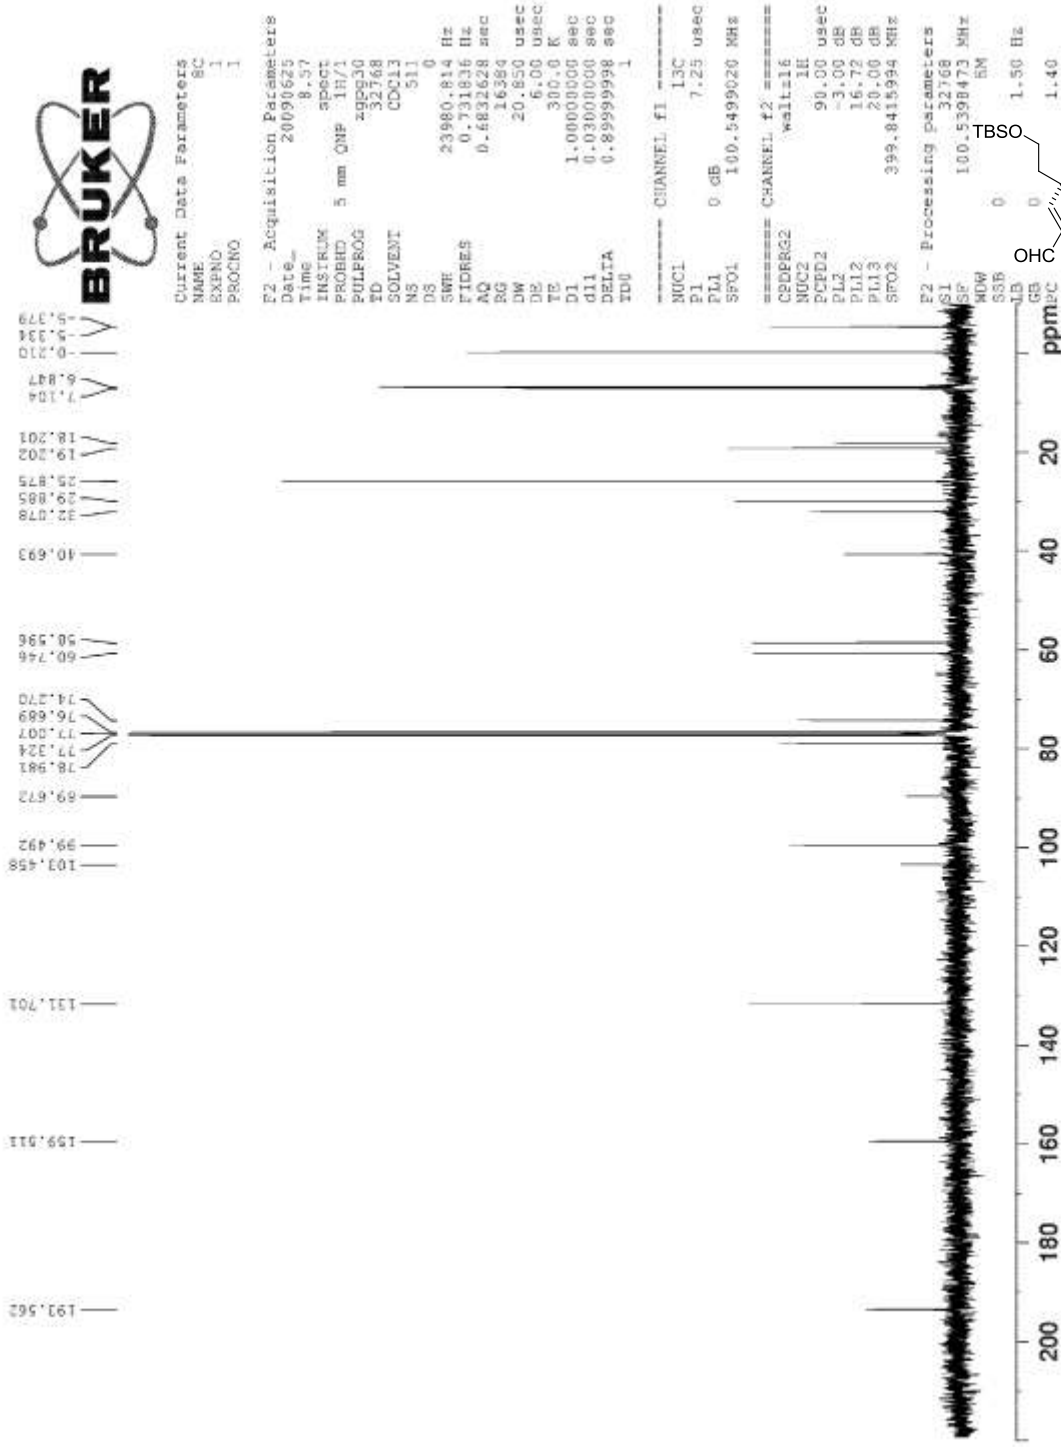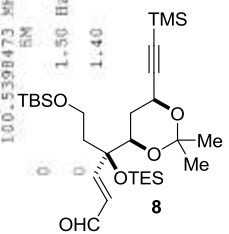

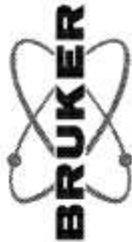

Current Data Parameters  
NAME 9H  
EXPNO 1  
PROCNO 1

F2 - Acquisition Parameters

Date\_ 20090803  
Time 8.51  
INSTRUM spect  
PROBHD 5 mm PABBO BB  
PULPROG zg30  
TD 65536  
SOLVENT CDCl3  
NS 16  
DS 0  
SWH 7507.507 Hz  
FIDRES 0.114555 Hz  
AQ 4.3647475 sec  
RG 161.3  
DM 66.600 usec  
DE 6.00 usec  
TE 292.5 K  
D1 1.00000000 sec  
TDC 1

===== CHANNEL f1 =====

NUC1 1H  
P1 17.50 usec  
PL1 -3.00 dB  
SFO1 500.1330008 MHz

F2 - Processing parameters

SF 500.1300135 MHz  
WDW EM  
SSB 0  
LB 0.25 Hz  
GB 0  
PC 1.00

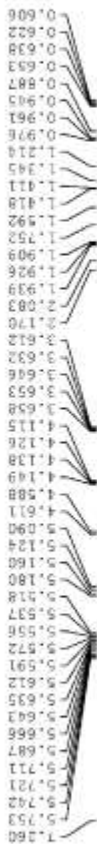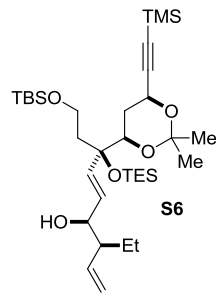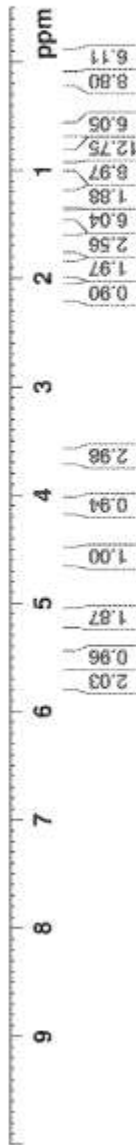

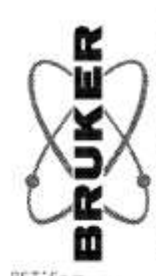

5.1258  
5.1238  
0.171  
6.854  
7.222  
11.888  
18.343  
19.227  
23.260  
25.968  
29.948  
31.946  
29.990  
52.721  
59.426  
60.888  
73.995  
74.062  
76.747  
77.001  
77.255  
78.203  
89.112  
99.156  
104.065  
118.017  
130.640  
132.791  
138.318

Current Data Parameters  
NAME 9C  
EXPNO 1  
PROCNO 1

F2 - Acquisition Parameters  
Date\_ 20090803  
Time 8.55

INSTRUM spect  
PROBHD 5 mm F4BBO BB/  
PULPROG zgpg30  
TD 65536  
SOLVENT CDCl3  
NS 2193  
DS 0

SWH 30581.039 Hz  
FIDRES 0.466630 Hz  
AQ 1.0715638 sec  
RG 32768  
DM 16.350 usec  
DE 6.00 usec  
TE 292.8 K

D1 1.00000000 sec  
d11 0.03000000 sec  
DELTA 0.89999998 sec  
TD0 1

===== CHANNEL f1 =====  
NUC1 13C  
P1 7.00 usec  
PL1 0 dB  
SFO1 125.7705462 MHz

===== CHANNEL f2 =====  
CDEPRG2 waltz16  
NUC2 1H  
PCPD2 70.00 usec  
PL2 0 dB  
PL12 14.30 dB  
PL13 18.00 dB  
SFO2 500.1320005 MHz

F2 - Processing parameters  
SI 65536  
SF 125.7577933 MHz  
WDW EN  
SSB 0  
GB 0  
PC 1.00 Hz  
MC 1.40

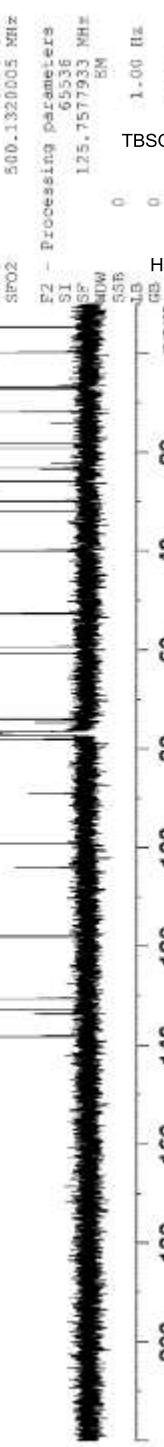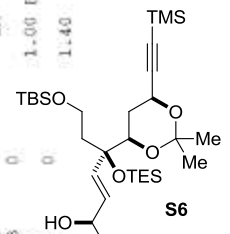

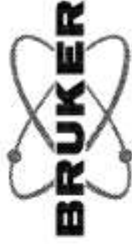

Current Data Parameters  
NAME 10H  
EXPNO 1  
PROCNO 1

F2 - Acquisition Parameters

Date\_ 20100522  
Time 12.21  
INSTRUM spect  
PROBHD 5 mm F4BBO BB/  
PULPROG zg30  
TD 65536  
SOLVENT CDCl3  
NS 8  
DS 0  
SWH 7507.507 Hz  
FIDRES 0.114555 Hz  
AQ 4.3647475 sec  
RG 90.5  
DM 66.600 usec  
DE 6.00 usec  
TE 292.3 K  
D1 1.00000000 sec  
TDC 1

CHANNEL f1

NUC1 1H  
P1 13.50 usec  
PL1 0 dB  
SFO1 500.1330008 MHz

F2 - Processing parameters

SF 500.1300127 MHz  
WDW EM  
SSB 0  
LB 0.25 Hz  
GB 0  
PC 1.00

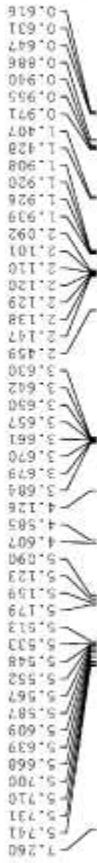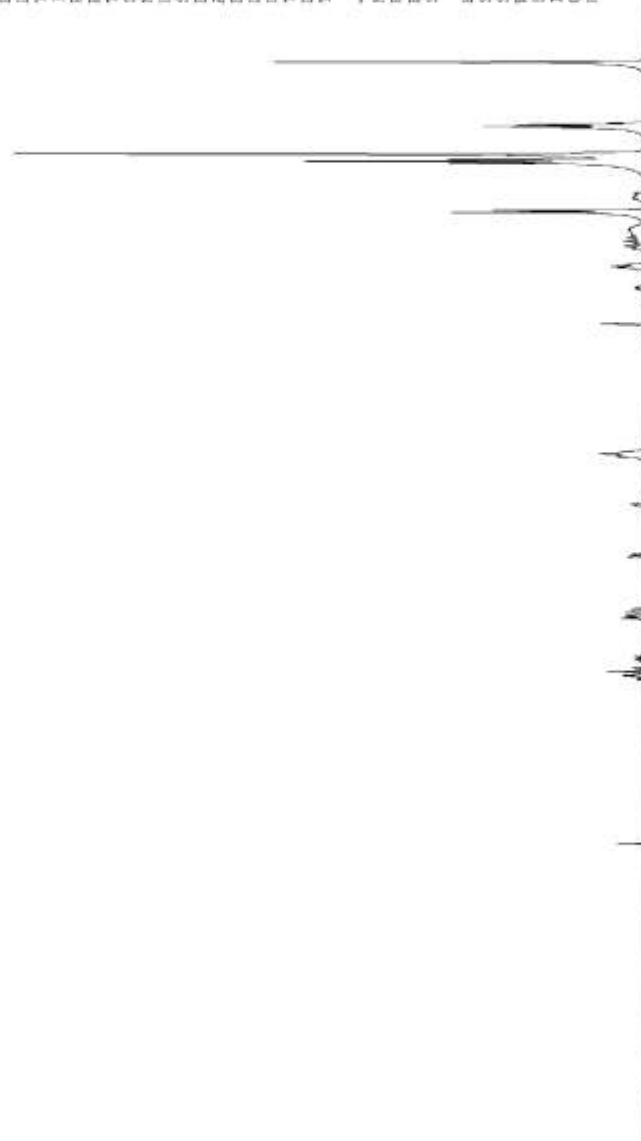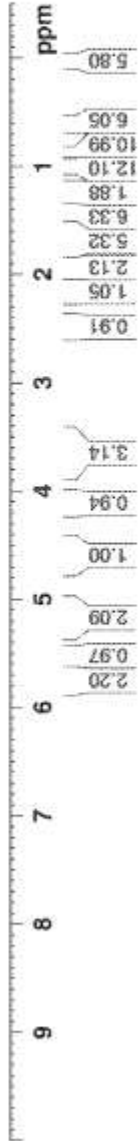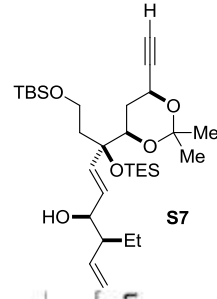



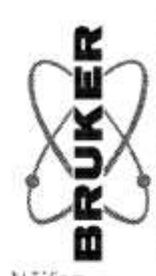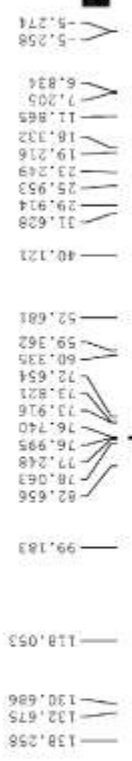

Current Data Parameters  
NAME IDC  
EXPNO 1  
PROCNO 1

F2 - Acquisition Parameters  
Date\_ 20100522  
Time 12.29  
INSTRUM spect  
PROBHD 5 mm F4BBO BB/  
PULPROG zgpg30  
TD 65536  
SOLVENT CDCl3  
NS 301  
DS 0  
SWH 30581.039 Hz  
FIDRES 0.466630 Hz  
AQ 1.0715638 sec  
RG 32768  
DM 16.350 usec  
DE 6.00 usec  
TE 293.4 K  
D1 1.00000000 sec  
d11 0.03000000 sec  
DELTA 0.89999998 sec  
TD0 1

===== CHANNEL f1 =====  
NUC1 13C  
P1 7.00 usec  
PL1 0 dB  
SFO1 125.7705462 MHz  
  
===== CHANNEL f2 =====  
CDEPRG2 waltz16  
NUC2 1H  
PCPD2 70.00 usec  
PL2 0 dB  
PL12 14.30 dB  
PL13 18.00 dB  
SFO2 500.1320005 MHz

F2 - Processing parameters  
SI 65536  
SF 125.7577946 MHz  
WDW EM  
SSB 0  
LB 0.50 Hz  
GB 0  
PC 1.40

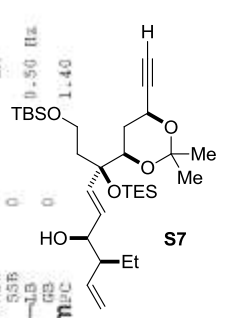

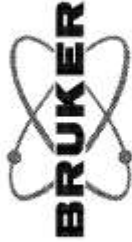

Current Data Parameters  
NAME iih  
EXPNO 1  
PROCNO 1

F2 - Acquisition Parameters  
Date\_ 20100506  
Time 11:35

INSTRUM spect  
PROBHD 5 mm TXI 13C Z  
PULPROG zg30  
TD 32768  
SOLVENT CDCl3  
NS 16  
DS 0  
SWH 5341.880 Hz  
FIDRES 0.163021 Hz  
AQ 3.0671349 sec  
RG 90.3  
DW 93.600 usec  
DE 6.00 usec  
TE 293.7 K  
D1 1.00000000 sec  
TD0 1

===== CHANNEL f1 =====  
NUC1 1H  
P1 10.50 usec  
PL1 0 dB  
SFO1 400.0923618 MHz

F2 - Processing parameters  
SI 32768  
SF 400.0900027 MHz  
WDW EM  
SSB 0  
LB 0.25 Hz  
GB 0  
PC 1.00

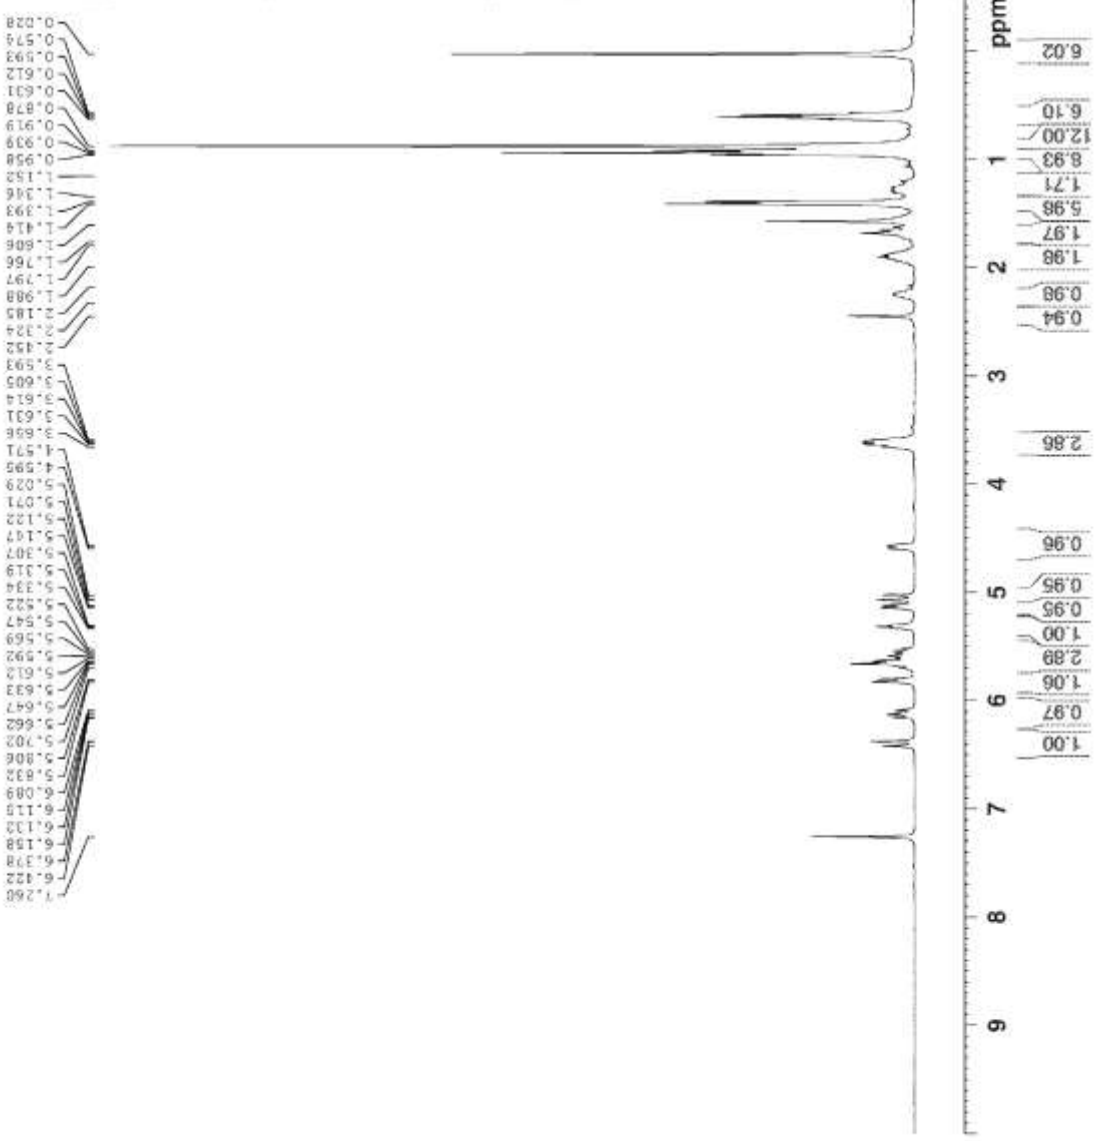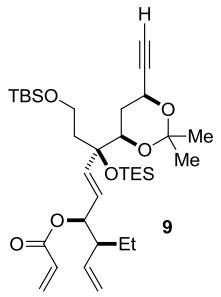

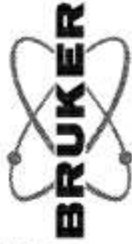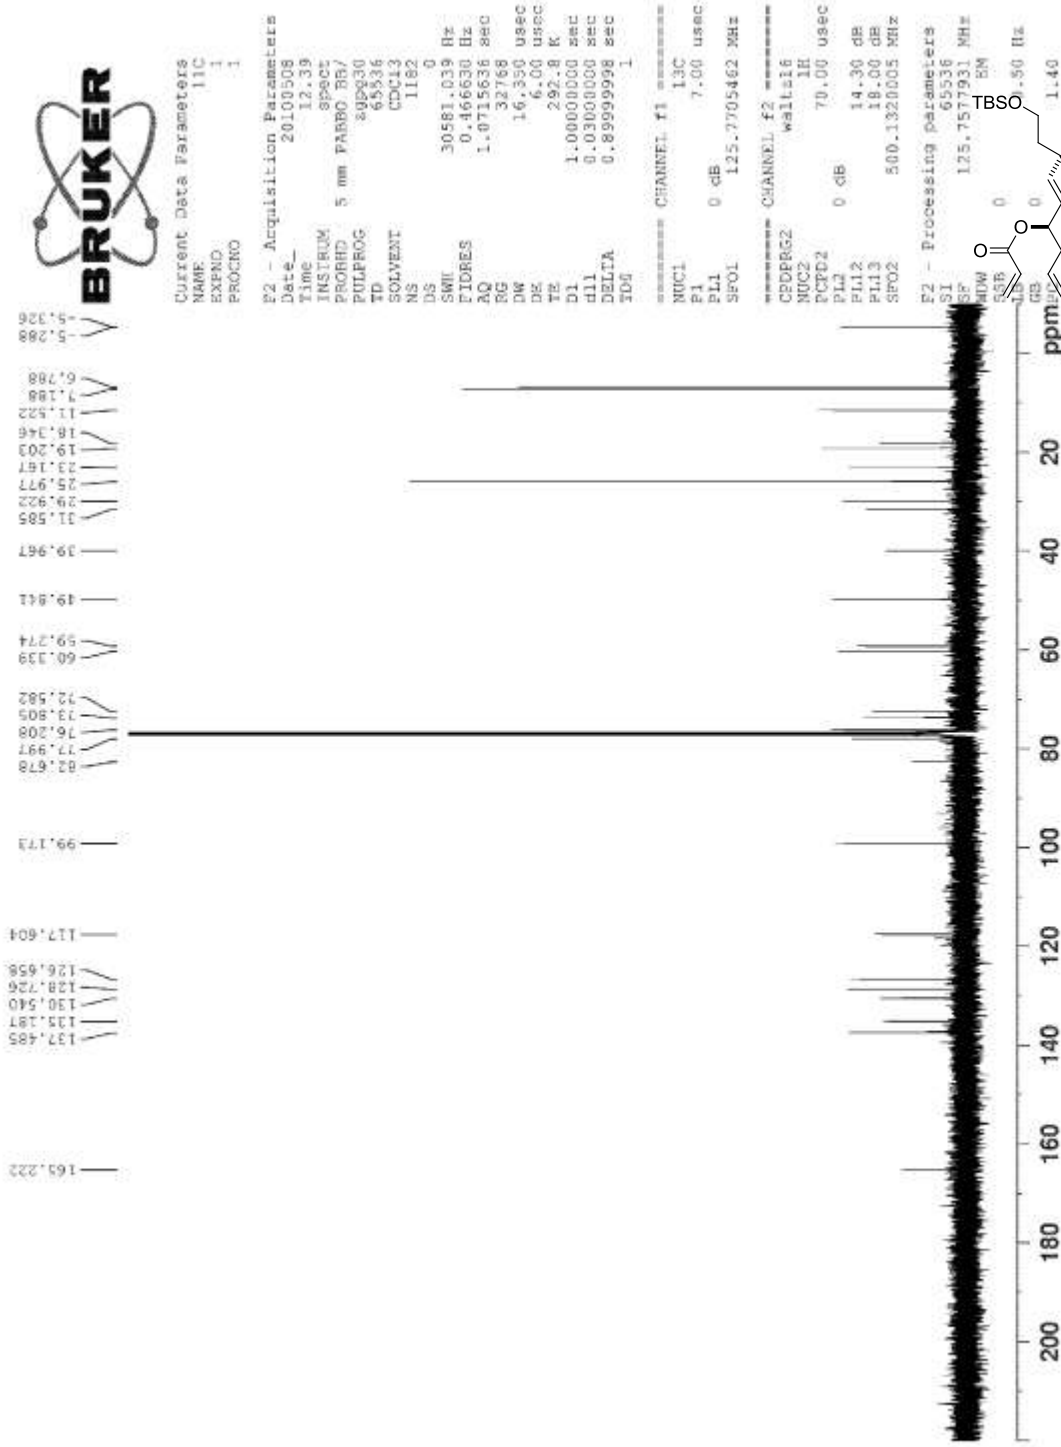

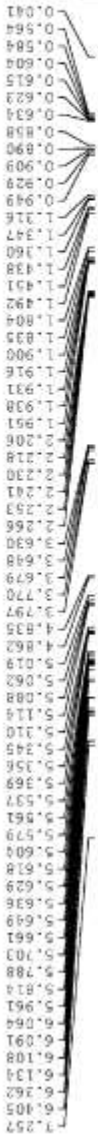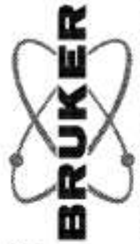

Current Data Parameters  
 NAME 12H  
 EXPNO 1  
 PROCNO 1

F2 - Acquisition Parameters  
 Date\_ 20090930  
 Time\_ 17.07  
 INSTRUM spect  
 PROBRD 5 mm QNP 1H/1  
 PULPROG zgpg30  
 TD 32768  
 SOLVENT CDCl3  
 NS 16  
 DS 0  
 SWH 6218.905 Hz  
 FIDRES 0.189786 Hz  
 AQ 2.6345973 sec  
 RG 161.3  
 DW 80.400 usec  
 DE 6.00 usec  
 TE 300.0 K  
 D1 1.00000000 sec  
 TDC 1

===== CHANNEL f1 =====  
 NUC1 1H  
 P1 9.30 usec  
 PL1 -3.00 dB  
 SFO1 399.8424924 MHz

F2 - Processing parameters  
 SI 32768  
 SF 399.840093 MHz  
 WDW EM  
 SSB 0  
 LB 0.30 Hz  
 GB 0  
 PC 1.00

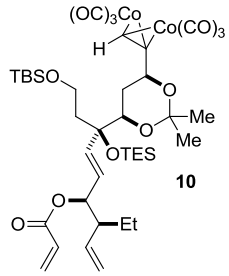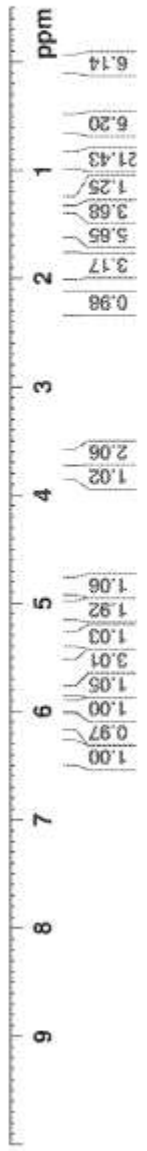

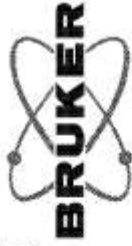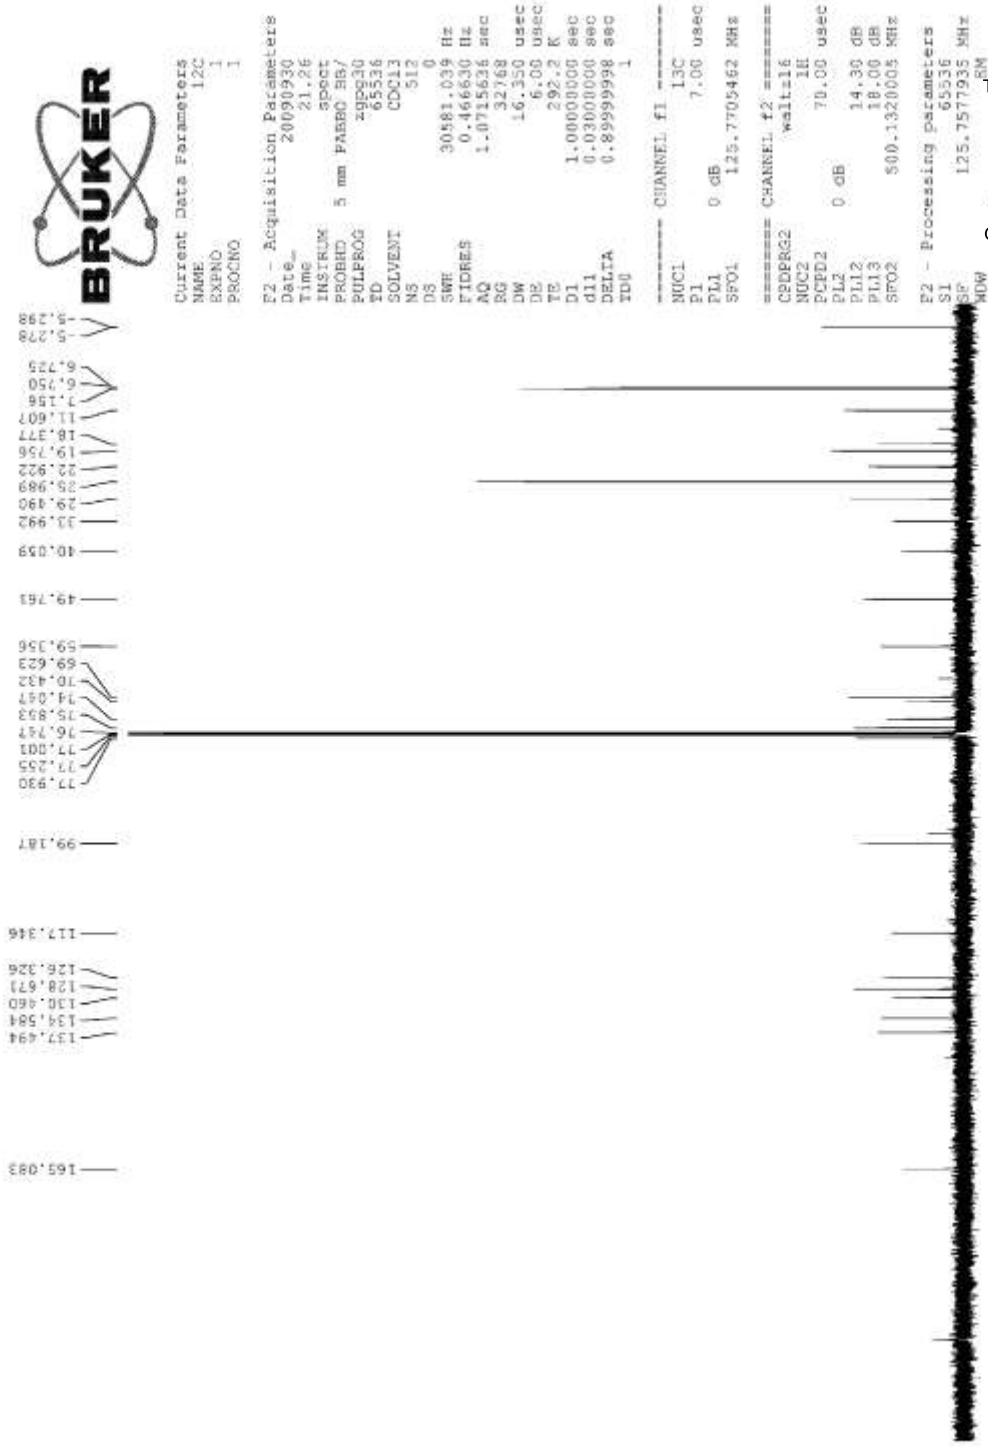

```

Current Data Parameters
NAME      I2C
EXPNO    1
PROCNO   1

F2 - Acquisition Parameters
Date_    20090930
Time     21.26
INSTRUM  spect
PROBHD   5 mm PABBO HS/
PULPROG  zgpg30
TD       65536
SOLVENT  CDCl3
NS       512
DS       0
SWH      30481.039 Hz
FIDRES   0.466630 Hz
AQ       1.0715628 sec
RG       32768
DW       16.350 usec
DE       6.00 usec
TE       292.2 K
d11      1.00000000 sec
d12      0.03000000 sec
DELTA    0.89999998 sec
TD0      1

===== CHANNEL f1 =====
NUC1      13C
P1        7.00 usec
PL1       0 dB
SFO1      125.7705462 MHz

===== CHANNEL f2 =====
CDEPRG2   waltz16
NUC2      1H
P2        70.00 usec
PL2       0 dB
PL12      14.30 dB
PL13      18.00 dB
SFO2      500.1320005 MHz

F2 - Processing parameters
SI        65536
SF        125.7577935 MHz
WDW       EM
SSB       0
GB        0
PC
  
```

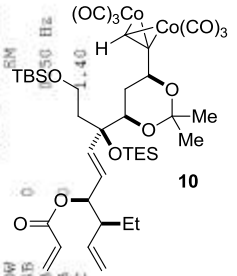

SNCXI-187-H1

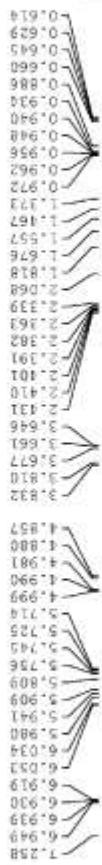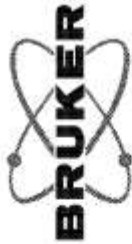

Current Data Parameters  
NAME LH  
EXPNO 1  
PROCNO 1

F2 - Acquisition Parameters  
Date\_ 20090804  
Time 9.20  
INSTRUM spect  
PROBHD 5 mm PABBO HS/  
PULPROG zg30  
TD 65536  
SOLVENT CDCl3  
NS 16  
DS 0  
SWH 7507.507 Hz  
FIDRES 0.114958 Hz  
AQ 4.364743 sec  
RG 57  
DW 66.600 usec  
DE 6.00 usec  
TE 292.5 K  
D1 1.00000000 sec  
TD6 1

===== CHANNEL f1 =====  
NUC1 1H  
P1 17.50 usec  
PL1 -3.00 dB  
SFO1 500.1330008 MHz

F2 - Processing parameters  
SI 32768  
SF 500.1300142 MHz  
WDW EM  
SSB 0  
LB 0.25 Hz  
GB 0  
PC 1.00

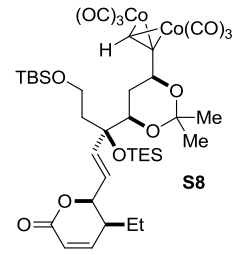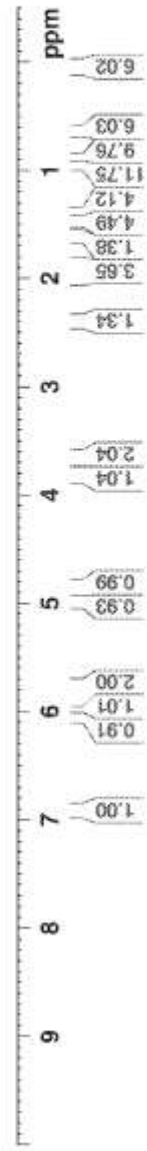

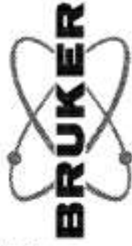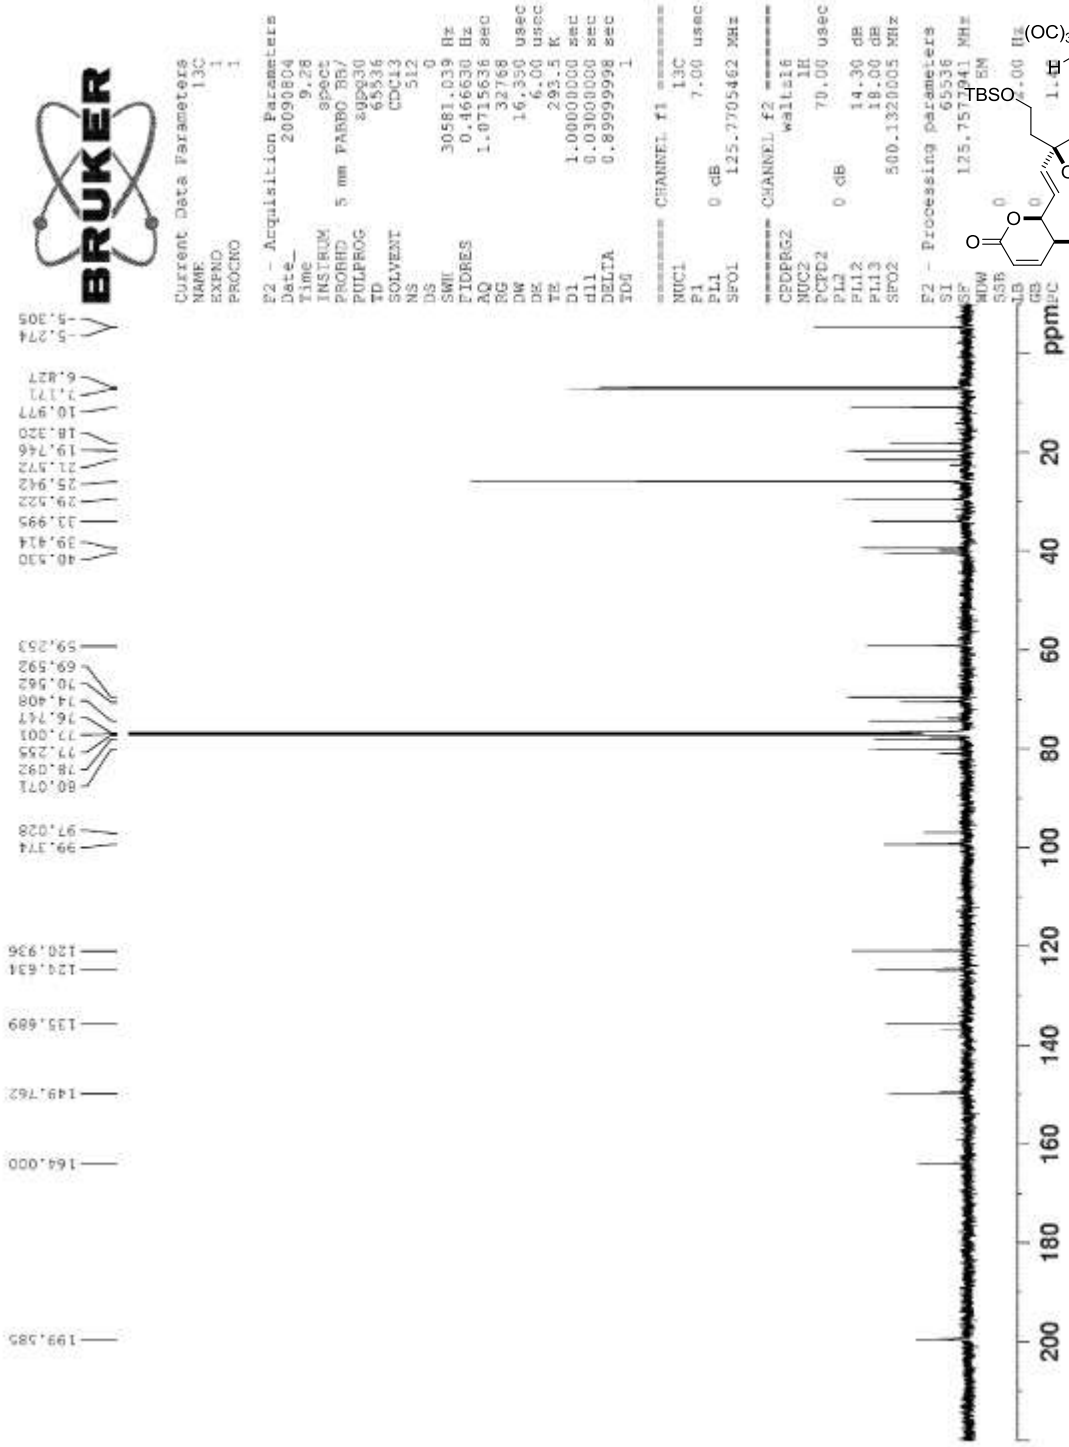

Current Data Parameters  
NAME 13C  
EXPNO 1  
PROCNO 1

F2 - Acquisition Parameters  
Date\_ 20090804  
Time 9.28  
INSTRUM spect  
PROBHD 5 mm PABBO BB/  
PULPROG zgpg30  
TD 65536  
SOLVENT CDCl3  
NS 512  
DS 0  
SWH 30581.039 Hz  
FIDRES 0.466630 Hz  
AQ 1.0715638 sec  
RG 32768  
DW 16.350 usec  
DE 6.00 usec  
TE 293.5 K  
D1 1.00000000 sec  
d11 0.03000000 sec  
DELTA 0.89999998 sec  
TD0 1

===== CHANNEL f1 =====  
NUC1 13C  
P1 7.00 usec  
PL1 0 dB  
SFO1 125.7705462 MHz

===== CHANNEL f2 =====  
CDPRG2 waltz16  
NUC2 1H  
PCPD2 70.00 usec  
PL2 0 dB  
PL12 14.30 dB  
PL13 18.00 dB  
SFO2 500.1320005 MHz

F2 - Processing parameters  
SI 65536  
SF 125.7572411 MHz  
WDW EN  
SSB 0  
LB 0.00 Hz  
GB 0  
PC 0

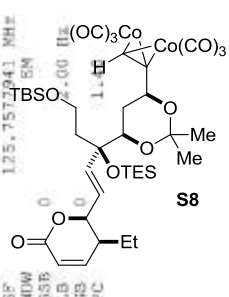

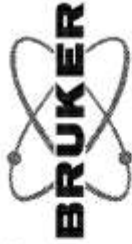

0.979  
1.412  
1.432  
1.455  
1.527  
1.603  
1.679  
1.750  
1.776  
1.878  
1.894  
1.907  
1.917  
1.920  
1.936  
1.970  
1.987  
1.993  
2.001  
2.006  
2.018  
2.034  
2.039  
2.048  
2.108  
2.148  
2.187  
2.191  
2.199  
2.400  
2.417  
2.461  
2.618  
3.630  
3.690  
3.690  
3.672  
3.676  
3.699  
4.585  
4.609  
5.022  
5.030  
5.040  
5.734  
5.745  
5.765  
5.776  
5.889  
5.915  
6.048  
6.060  
6.940  
6.950  
6.959  
6.970  
7.259

Current Data Parameters  
NAME 14H  
EXPNO 1  
PROCNO 1

F2 - Acquisition Parameters  
Date\_ 20090717  
Time 19.09  
INSTRUM spect  
PROBHD 5 mm PABBO HB/  
PULPROG zg30  
TD 65536  
SOLVENT CDCl3  
NS 16  
DS 0  
SWH 7507.507 Hz  
FIDRES 0.114958 Hz  
AQ 4.3647475 sec  
RG 322.3  
DW 66.600 usec  
DE 6.00 usec  
TE 292.7 K  
D1 1.00000000 sec  
TD6 1

===== CHANNEL f1 =====  
NUC1 1H  
P1 13.50 usec  
PL1 0 dB  
SFO1 500.1330008 MHz  
F2 - Processing parameters  
SI 32768  
SF 500.1300130 MHz  
WDW EM  
SSB 0  
LB 0.25 Hz  
GB 0  
PC 1.00

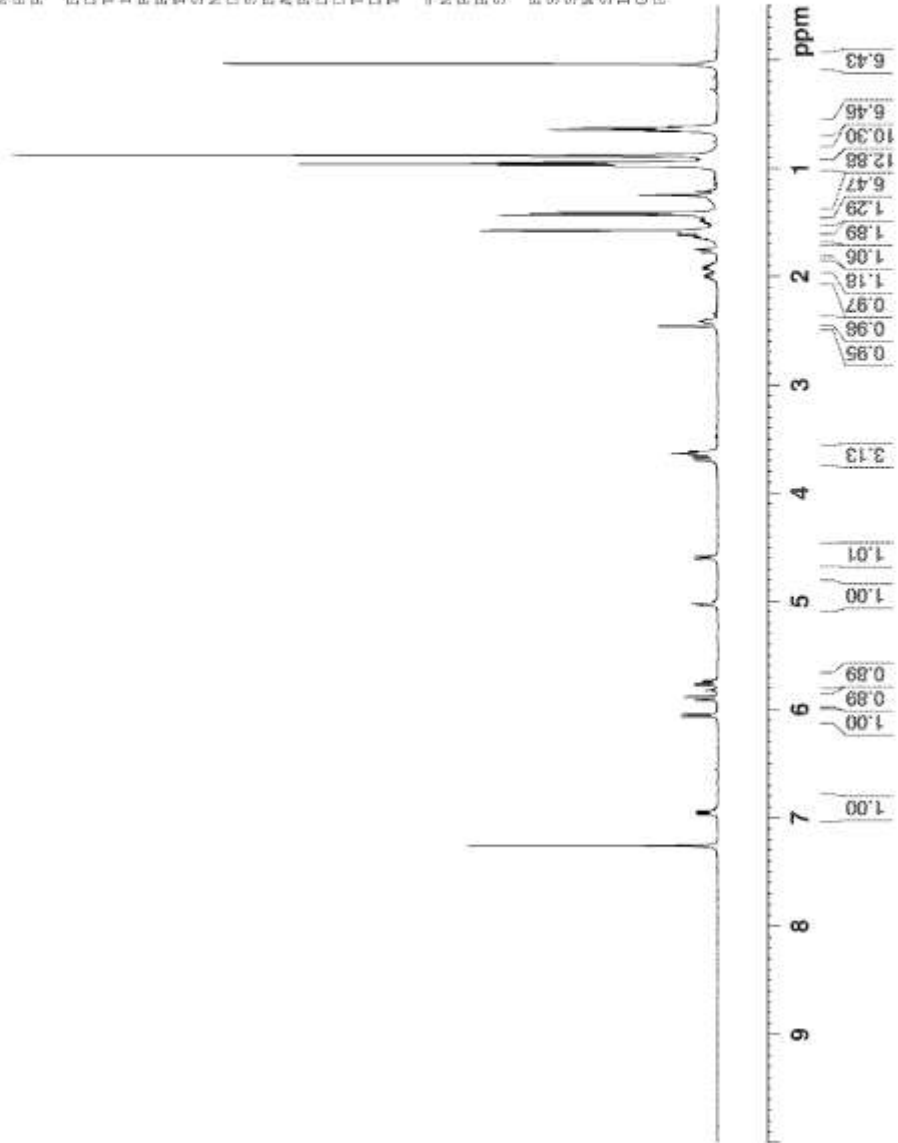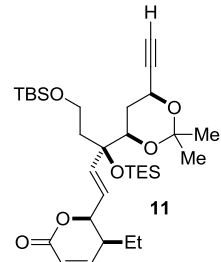



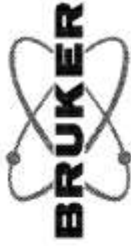

Current Data Parameters  
NAME JTM-14C C13  
EXPNO 1  
PROCNO 1

F2 - Acquisition Parameters

Date\_ 20110319  
Time 9.19  
INSTRUM spect  
PROBHD 5 mm F4BBO BB-  
PULPROG zgpg30  
TD 65536  
SOLVENT CDCl3  
NS 928  
DS 0  
SWH 24038.461 Hz  
FIDRES 0.366798 Hz  
AQ 1.3631988 sec  
RG 200.09  
DM 20.800 usec  
DE 6.50 usec  
TE 298.4 K  
D1 2.00000000 sec  
D11 0.03000000 sec

===== CHANNEL f1 =====  
NUC1 13C  
P1 7.50 usec  
PLW1 51.20000076 W  
SFO1 100.6127703 MHz

===== CHANNEL f2 =====  
CSPRG2 waltz16  
NUC2 1H  
PCPD2 80.00 usec  
PLW2 11.19999981 W  
PLW3 0.28820999 W  
SFO2 400.0916004 MHz

F2 - Processing parameters  
SI 32768  
SF 100.6027125 MHz  
WDW EM  
SSB 0  
LB 1.00 Hz  
GB 0  
FC 1.40

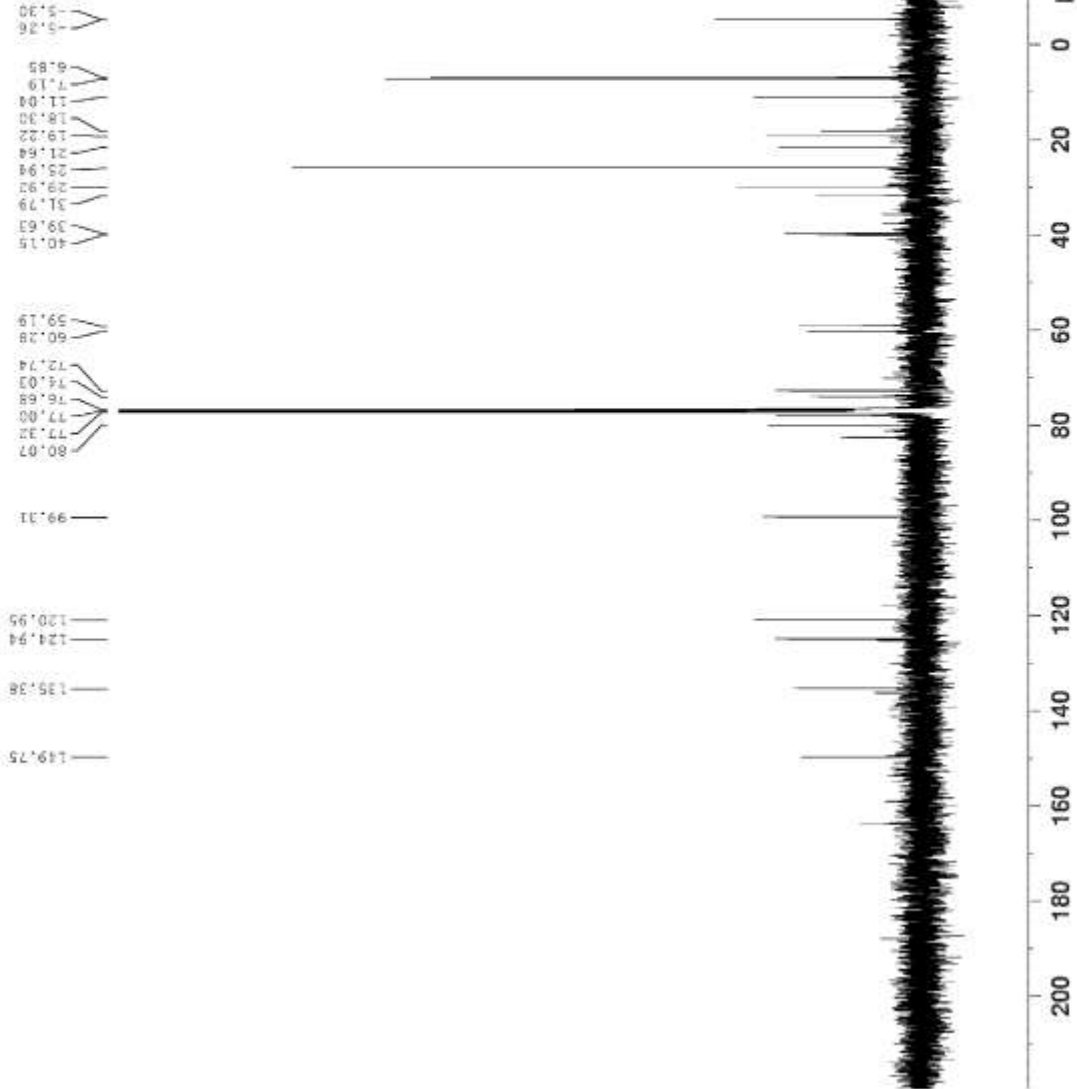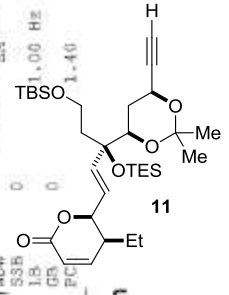

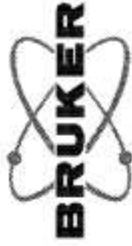

Current Data Parameters  
 NAME 15H  
 EXPNO 1  
 PROCNO 1

F2 - Acquisition Parameters

Date\_ 20100409  
 Time 14.49  
 INSTRUM spect  
 PROBRD 5 mm PABBO BB/  
 PULPROG zg30  
 TD 65536  
 SOLVENT CDCl3  
 NS 8  
 DS 0  
 SWH 7507.507 Hz  
 FIDRES 0.114555 Hz  
 AQ 4.3647475 sec  
 RG 228.1  
 DW 66.600 usec  
 DE 6.00 usec  
 TE 291.5 K  
 D1 1.00000000 sec  
 TDC 1

CHANNEL f1

NUC1 1H  
 P1 13.50 usec  
 PL1 0 dB  
 SFO1 500.1330008 MHz  
 F2 - Processing parameters  
 SI 32768  
 SF 500.1300133 MHz  
 WDW EM  
 SSB 0  
 LB 0.25 Hz  
 GB 0  
 PC 1.00

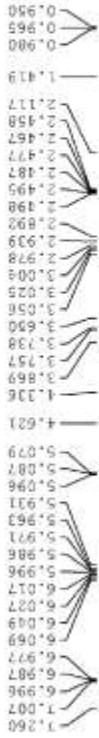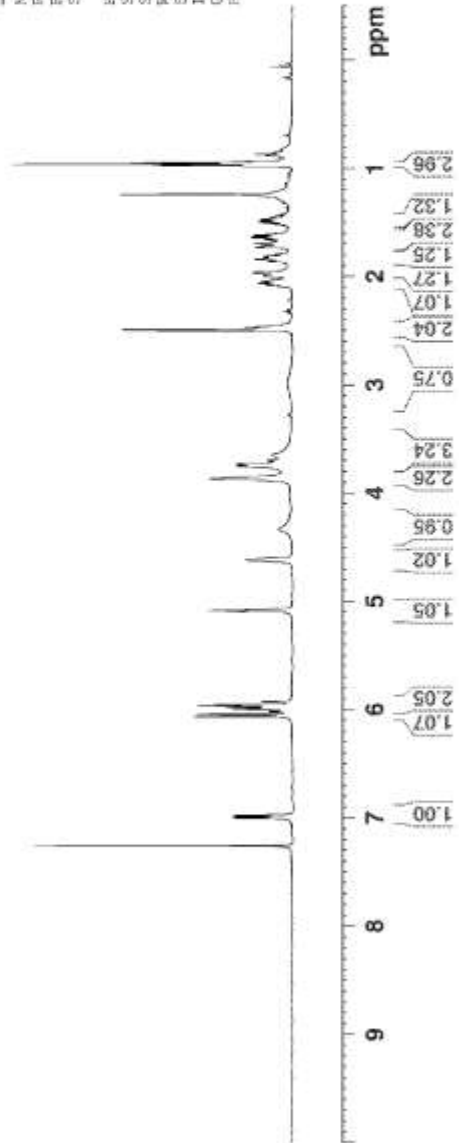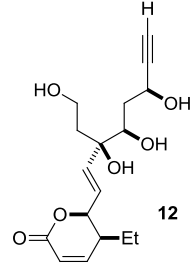

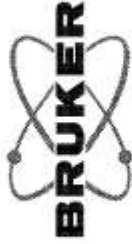

Current Data Parameters  
NAME 15C  
EXPNO 1  
PROCNO 1

F2 - Acquisition Parameters

Date\_ 20100409  
Time 14.56  
INSTRUM spect  
PROBHD 5 mm PABBO HS/  
PULPROG zgpg30  
TD 65536  
SOLVENT CDCl3  
NS 1207  
DS 0  
SWH 30581.039 Hz  
FIDRES 0.466630 Hz  
AQ 1.0715636 sec  
RG 32788  
DW 16.350 usec  
DE 6.00 usec  
TE 292.1 K  
D1 1.00000000 sec  
d11 0.03000000 sec  
DELTA 0.89999998 sec  
TD0 1

===== CHANNEL f1 =====  
NUC1 13C  
P1 6.80 usec  
PL1 0 dB  
SFO1 125.7705462 MHz

===== CHANNEL f2 =====  
CSDPRG2 waltz16  
NUC2 1H  
PCPD2 100.00 usec  
PL2 -3.00 dB  
PL12 14.00 dB  
PL13 14.00 dB  
SFO2 500.1320005 MHz

F2 - Processing parameters  
SI 65536  
SF 125.7577945 MHz  
WDW EM  
SSB 0  
LB 0.00 Hz  
GB 0  
PC 1.40

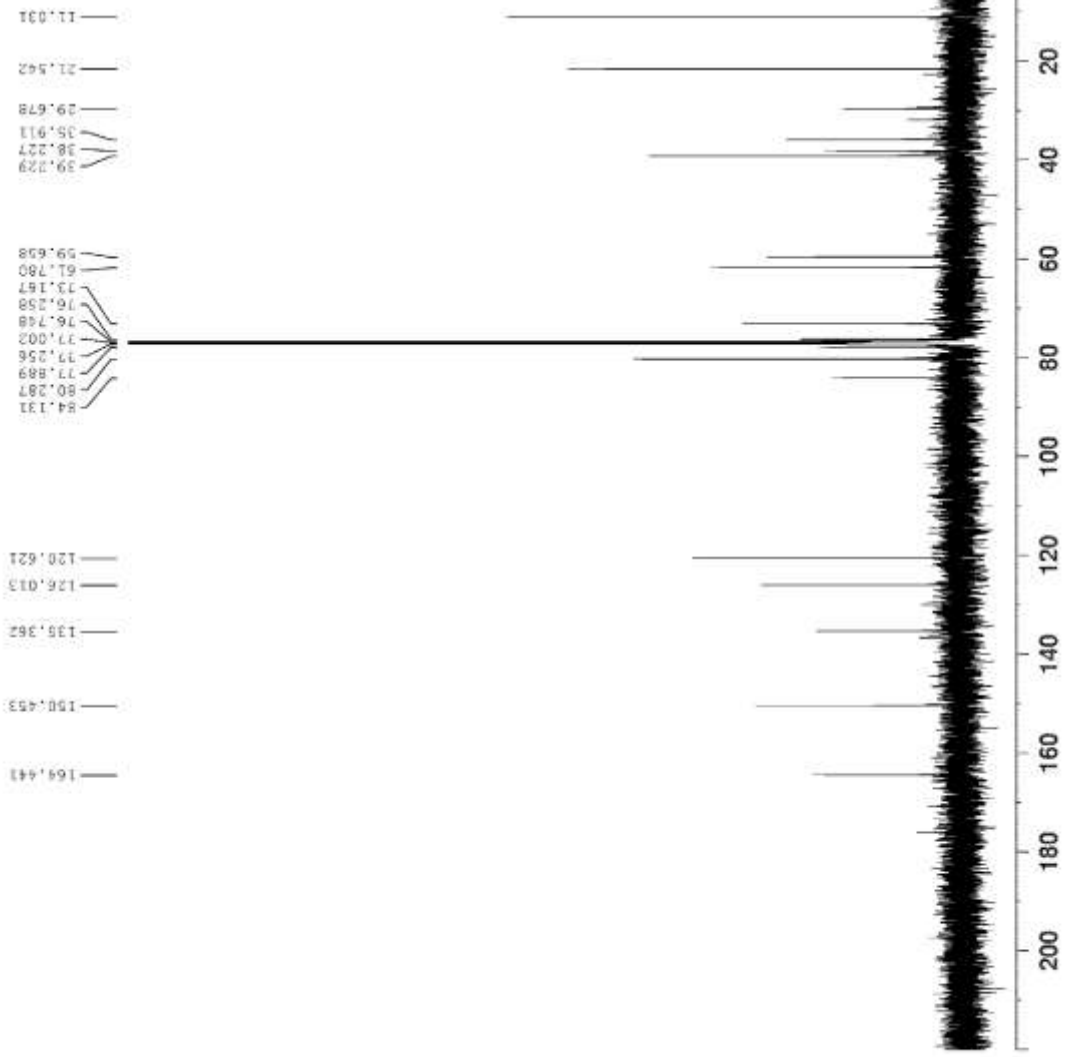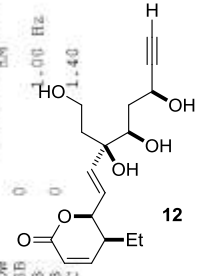







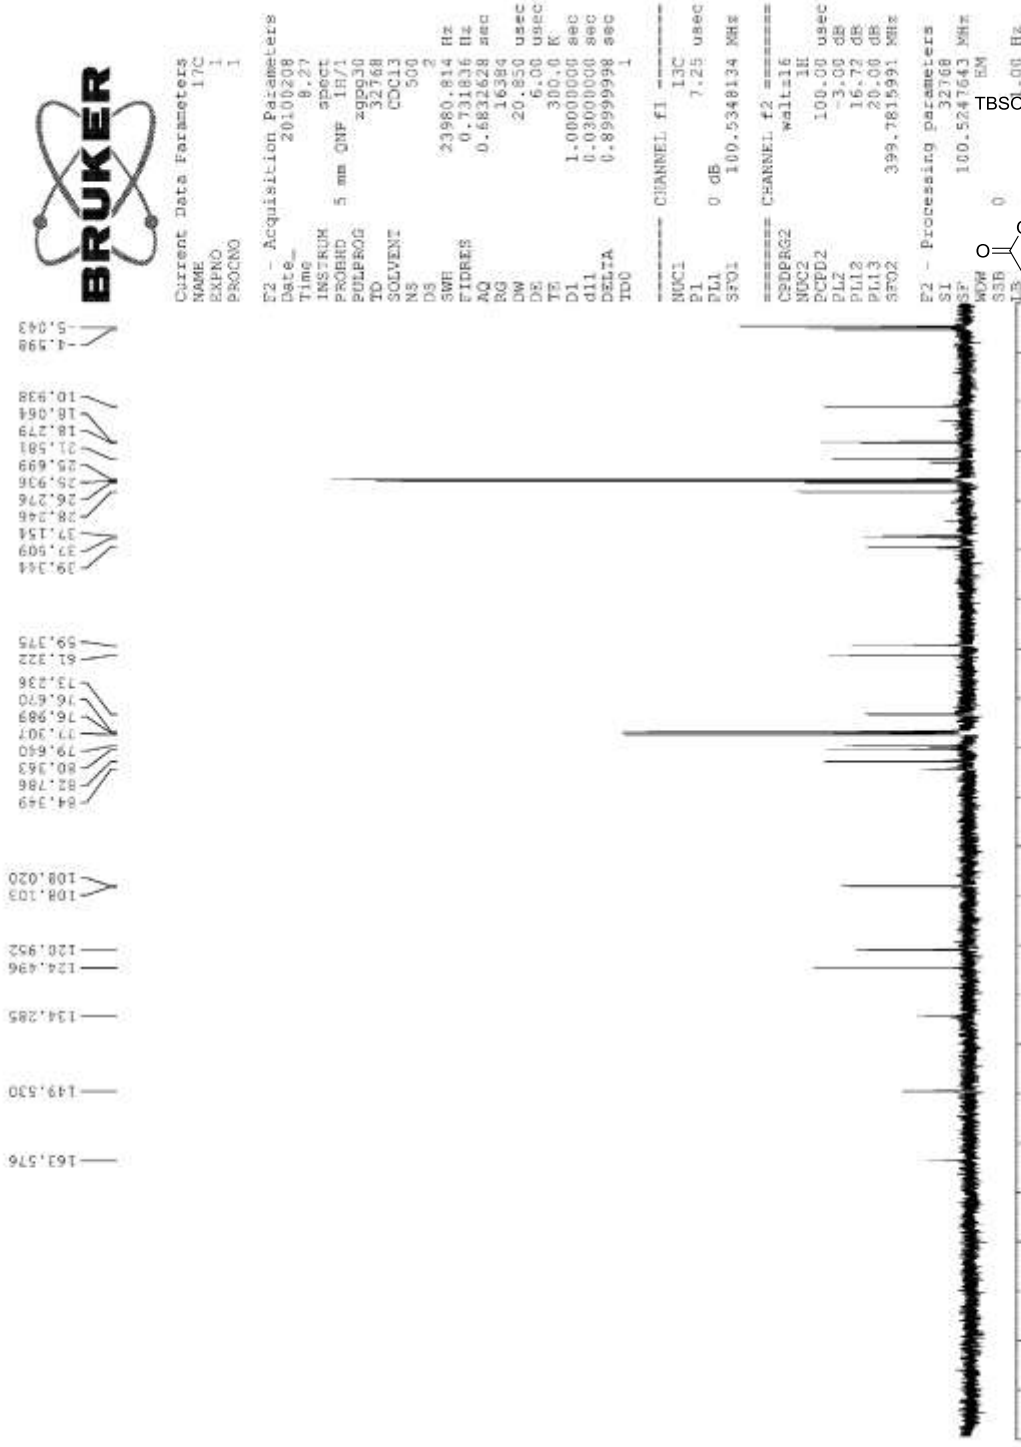







Current Data Parameters  
NAME 1BFC  
EXPNO 1  
PROCNO 1

F2 - Acquisition Parameters

Date\_ 20100621  
Time 15.17  
INSTRUM spect  
PROBHD 5 mm PABBO HS/  
PULPROG zgpg30  
TD 65536  
SOLVENT CDCl3  
NS 2761  
DS 0  
SWH 30581.039 Hz  
FIDRES 0.466630 Hz  
AQ 1.0715636 sec  
RG 32788  
DW 16.350 usec  
DE 6.00 usec  
TE 298.3 K  
D1 1.00000000 sec  
d11 0.03000000 sec  
DELTA 0.89999998 sec  
TD0 1

CHANNEL f1  
NUC1 13C  
P1 7.00 usec  
PL1 0 dB  
SFO1 125.7705462 MHz

CHANNEL f2  
CSDPRG2 waltz16  
NUC2 1H  
PCPD2 70.00 usec  
PL2 0 dB  
PL12 14.30 dB  
PL13 18.00 dB  
SFO2 500.1320005 MHz

F2 - Processing parameters  
SI 65536  
SF 125.7577917 MHz  
RG 65536  
EM

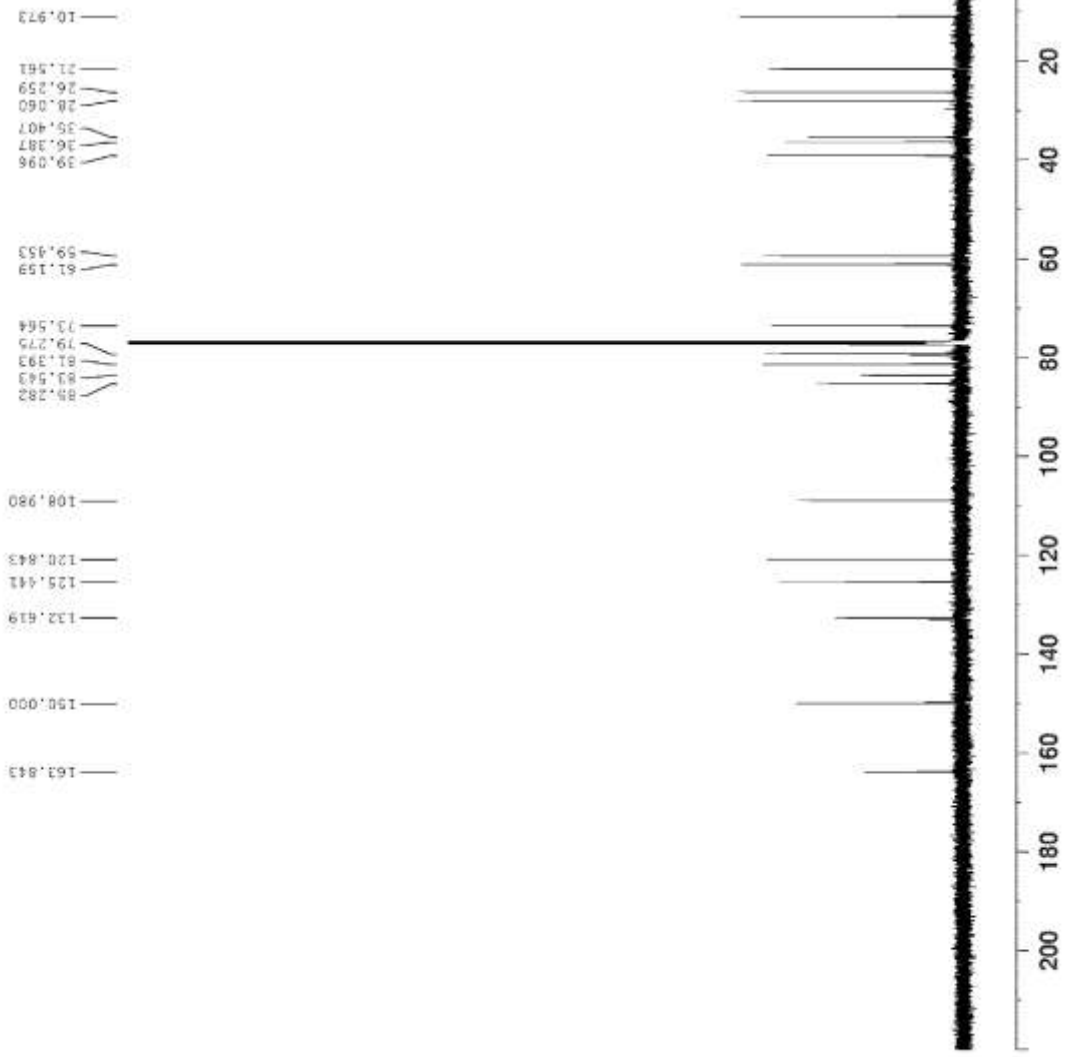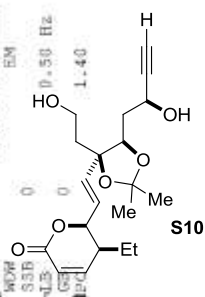



Current Data Parameters  
NAME 19f2h  
EXPNO 1  
PROCNO 1

F2 - Acquisition Parameters  
Date\_ 20100709  
Time 10.44  
INSTRUM spect  
PROBHD 5 mm PABBO HS/  
PULPROG zg30  
TD 65536  
SOLVENT CDCl3  
NS 16  
DS 0  
SWH 7507.507 Hz  
FIDRES 0.114558 Hz  
AQ 4.368773 sec  
RG 287.4  
DW 66.600 usec  
DE 6.00 usec  
TE 292.6 K  
D1 1.00000000 sec  
TD0 1

===== CHANNEL f1 =====  
NUC1 1H  
P1 13.50 usec  
PL1 0 dB  
SFO1 500.1330008 MHz

F2 - Processing parameters  
SI 32768  
SF 500.1300136 MHz  
WDW EM  
SSB 0  
LB 0.25 Hz  
GB 0  
PC 1.00

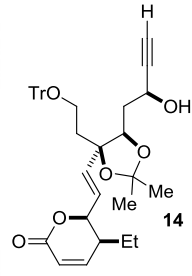

7.410  
7.395  
7.287  
7.273  
7.260  
7.250  
7.220  
7.210  
7.206  
7.192  
7.188  
6.876  
6.868  
6.857  
5.983  
5.963  
5.757  
5.712  
5.669  
5.661  
5.638  
5.630  
4.915  
4.908  
4.903  
4.559  
4.553  
4.547  
3.823  
3.808  
3.800  
3.445  
3.335  
3.324  
3.315  
3.305  
3.295  
3.087  
3.078  
3.066  
3.059  
3.048  
3.038  
2.686  
2.680  
2.494  
2.191  
2.177  
2.142  
1.632  
1.357  
1.316  
1.296  
1.019  
0.772  
0.757  
0.743

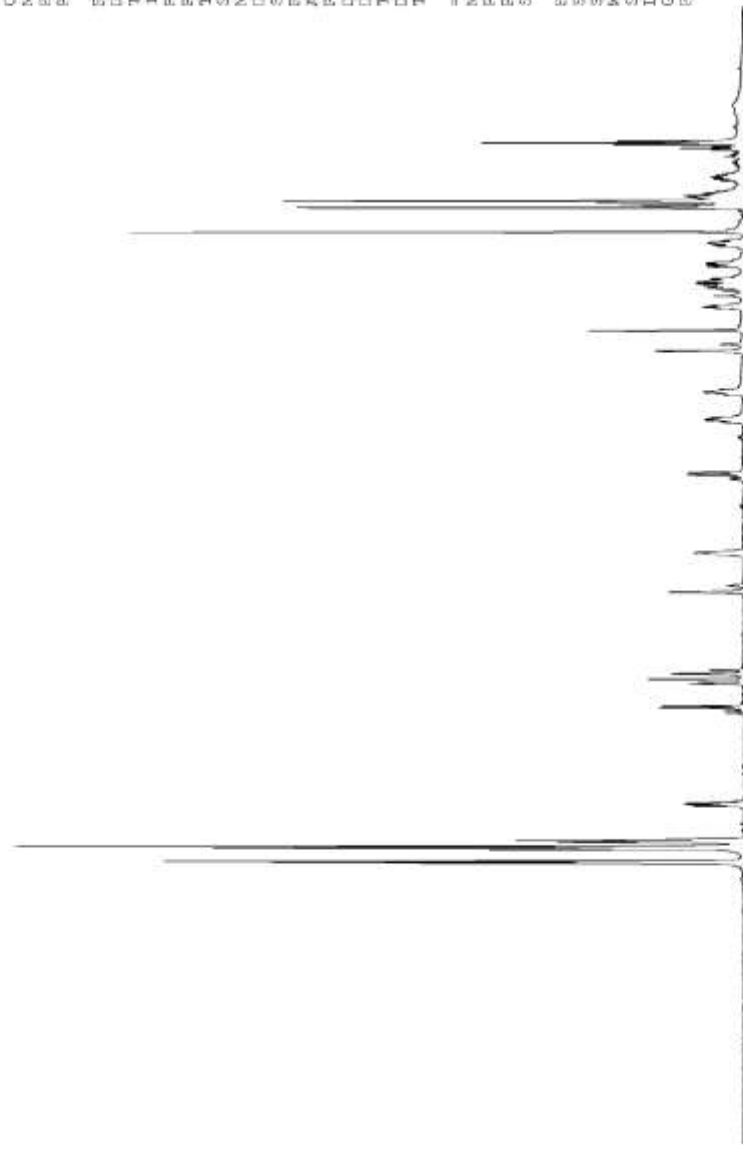

8.53  
8.24  
3.13  
0.98  
1.00  
1.21  
0.91  
0.83  
0.17  
1.07  
1.09  
4.17  
4.13  
3.18  
3.15  
1.16  
1.37  
2.49  
1.01  
1.19  
1.18  
1.13  
1.17  
3.29  
1.31  
1.97

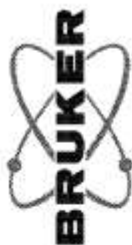

Current Data Parameters  
NAME 19f2c  
EXPNO 1  
PROCNO 1

F2 - Acquisition Parameters

Date\_ 20100709  
Time 10.53  
INSTRUM spect  
PROBHD 5 mm F4BBO BB/  
PULPROG zgpg30  
TD 65536  
SOLVENT CDCl3  
NS 3131  
DS 0  
SWH 30581.039 Hz  
FIDRES 0.466630 Hz  
AQ 1.0715638 sec  
RG 32768  
DM 16.350 usec  
DE 6.00 usec  
TE 292.9 K  
D1 1.00000000 sec  
d11 0.03000000 sec  
DELTA 0.89999998 sec  
TDF 1

===== CHANNEL f1 =====  
NUC1 13C  
P1 7.00 usec  
PL1 0 dB  
SFO1 125.7705462 MHz

===== CHANNEL f2 =====  
CDEPRG2 waltz16  
NUC2 1H  
PCPD2 70.00 usec  
PL2 0 dB  
PL12 14.30 dB  
PL13 18.00 dB  
SFO2 500.1320005 MHz

F2 - Processing parameters  
SI 65536  
SF 125.7577940 MHz  
WDW EN  
SSB 0  
LB 0.50 Hz  
GB 0  
PC 0

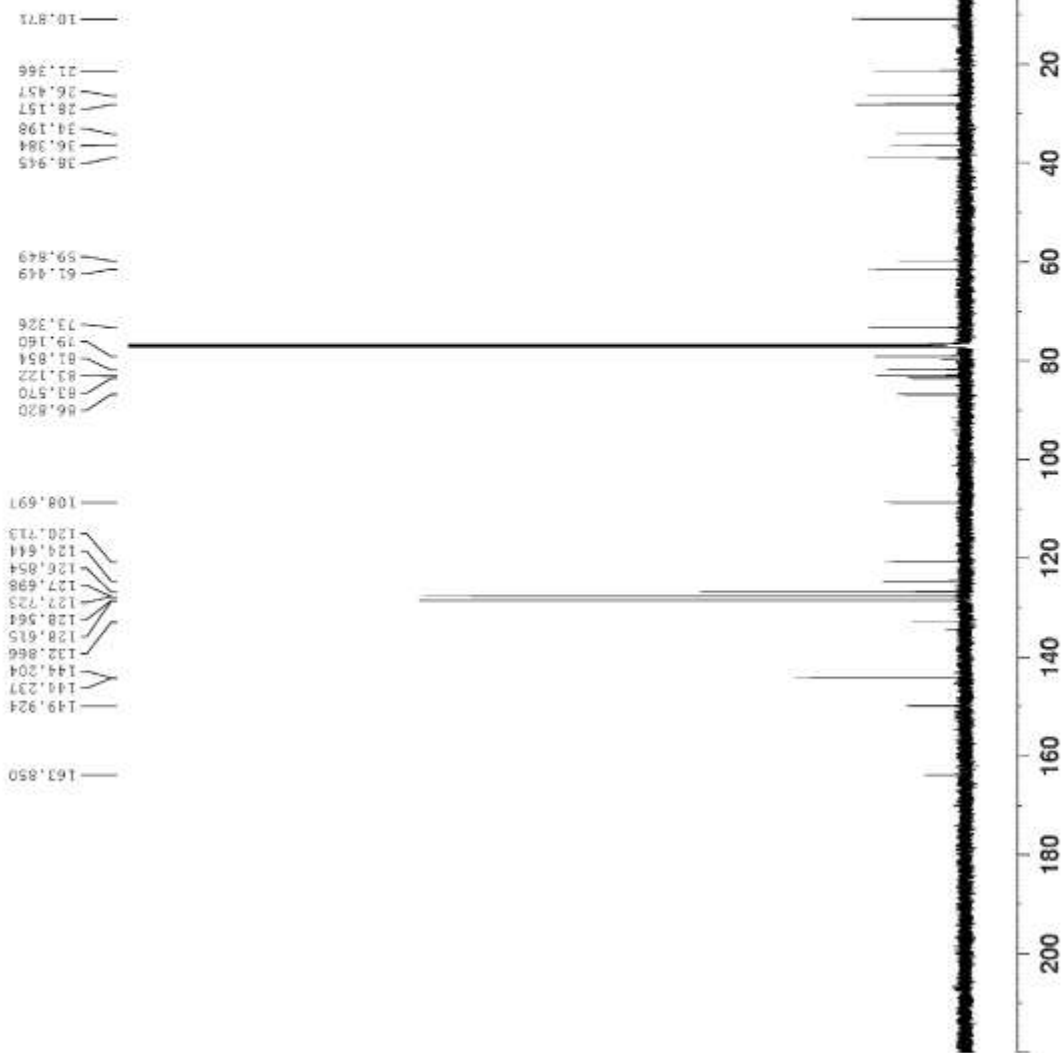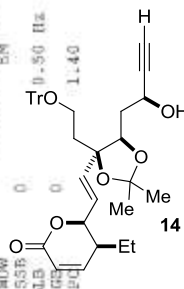

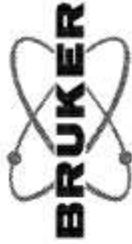

Current Data Parameters  
 NAME 20F3H  
 EXPNO 1  
 PROCNO 1

F2 - Acquisition Parameters

Date\_ 20100610  
 Time\_ 9.38  
 INSTRUM spect  
 PROBRD 5 mm QNP 1H/1  
 PULPROG zgpg30  
 TD 32768  
 SOLVENT Acetone  
 NS 16  
 DS 0  
 SWH 6218.905 Hz  
 FIDRES 0.189786 Hz  
 AQ 2.6345973 sec  
 RG 57  
 DW 80.400 usec  
 DE 6.00 usec  
 TE 300.0 K  
 D1 1.00000000 sec  
 TDC 1

CHANNEL f1

NUC1 1H  
 P1 9.30 usec  
 PL1 -3.00 dB  
 SFO1 399.7824920 MHz

F2 - Processing parameters

SF 399.7799909 MHz  
 WDW EM  
 SSB 0  
 LB 0.30 Hz  
 GB 0  
 PC 1.00

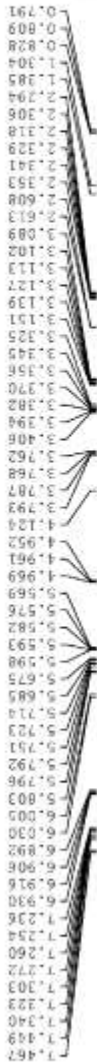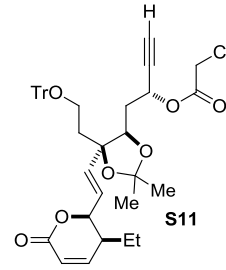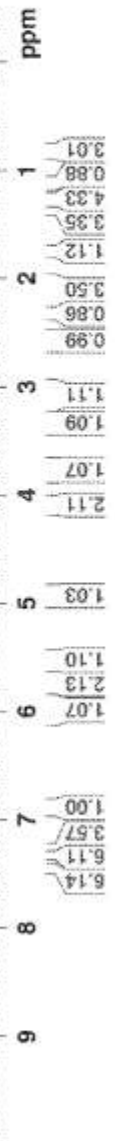



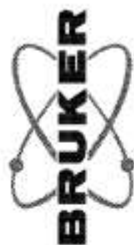

Current Data Parameters  
 NAME 21F4H  
 EXPNO 1  
 PROCNO 1

F2 - Acquisition Parameters

Date\_ 20100610  
 Time 12.53  
 INSTRUM spect  
 PROBRD 5 mm QNP 1H/1  
 PULPROG zgpg30  
 TD 32768  
 SOLVENT Acetone  
 NS 16  
 DS 0  
 SWH 6218.905 Hz  
 FIDRES 0.189786 Hz  
 AQ 2.6345973 sec  
 RG 57  
 DW 80.400 usec  
 DE 6.00 usec  
 TE 300.0 K  
 D1 1.00000000 sec  
 TDC 1

CHANNEL f1

NUC1 1H  
 P1 9.30 usec  
 PL1 -3.00 dB  
 SFO1 399.7824920 MHz

F2 - Processing parameters

SF 399.7799950 MHz  
 WDW EM  
 SSB 0  
 LB 0.30 Hz  
 GB 0  
 PC 1.00

7.567  
 7.119  
 6.911  
 6.898  
 6.889  
 6.878  
 6.013  
 5.989  
 5.793  
 5.749  
 5.719  
 5.678  
 4.946  
 4.649  
 4.163  
 4.136  
 4.101  
 3.566  
 3.119  
 3.112  
 3.077  
 2.519  
 2.311  
 2.109  
 2.079  
 2.051  
 1.884  
 1.871  
 1.854  
 1.836  
 1.740  
 1.721  
 1.695  
 1.429  
 1.402  
 1.364  
 1.278  
 1.166  
 1.054  
 0.816  
 0.797  
 0.780

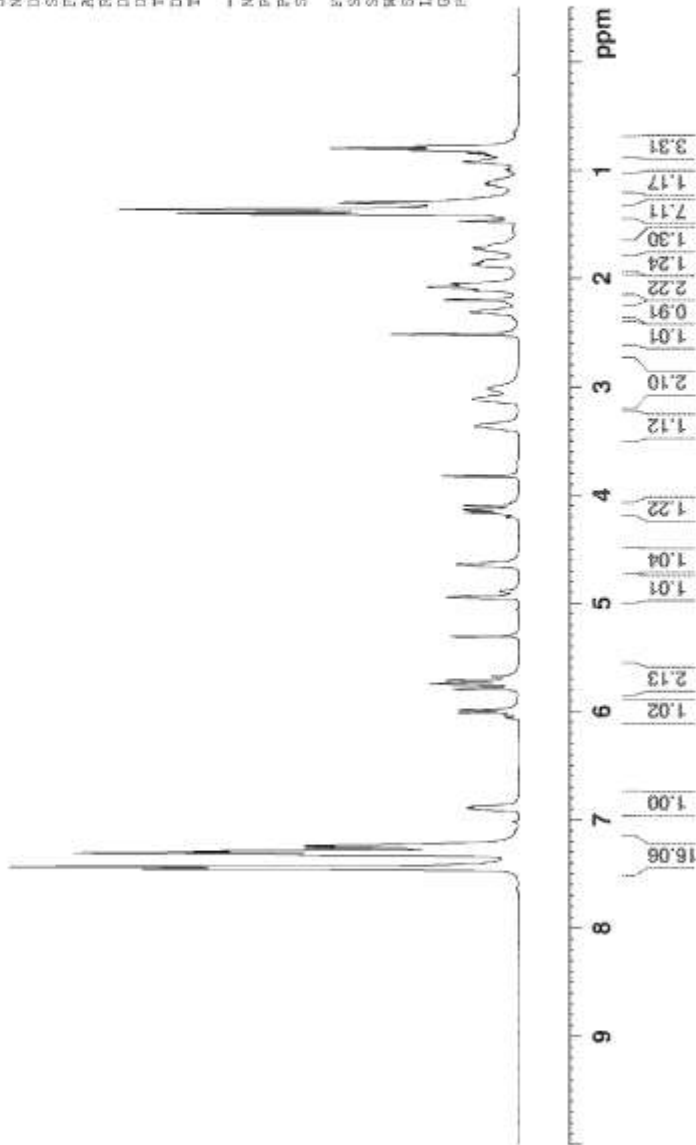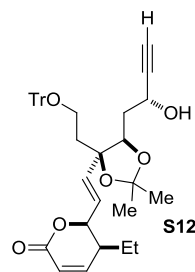

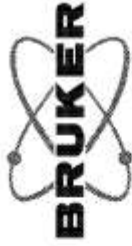

Current Data Parameters  
NAME 21F4C  
EXPNO 1  
PROCNO 1

F2 - Acquisition Parameters

Date\_ 20100610  
Time 12.52  
INSTRUM spect  
PROBRD 5 mm QNP 1H/1  
PULPROG zgpg30  
TD 32768  
SOLVENT CDCl3  
NS 800  
DS 0  
SWH 23980.814 Hz  
FIDRES 0.731836 Hz  
AQ 0.6833628 sec  
RG 16384  
DW 20.850 usec  
DE 6.00 usec  
TE 300.0 K  
D1 1.00000000 sec  
d11 0.03000000 sec  
DELTA 0.89999998 sec  
TD0 1

===== CHANNEL f1 =====  
NUC1 13C  
P1 7.25 usec  
PL1 0 dB  
SFO1 100.5348134 MHz

===== CHANNEL f2 =====  
CSPRG2 waltz16  
NUC2 1H  
PCPD2 90.00 usec  
PL2 -3.00 dB  
PL12 16.72 dB  
PL13 20.00 dB  
SFO2 399.7815991 MHz

F2 - Processing parameters  
SI 32768  
SF 100.5247703 MHz  
WDW EM  
SSB 0  
LB 0  
GB 0

10.796  
21.301  
26.389  
28.106  
34.271  
35.274  
39.029  
59.875  
60.051  
73.213  
76.651  
76.970  
77.288  
79.927  
83.943  
86.822  
108.450  
120.687  
124.618  
127.622  
128.547  
133.151  
144.255  
149.630  
163.667

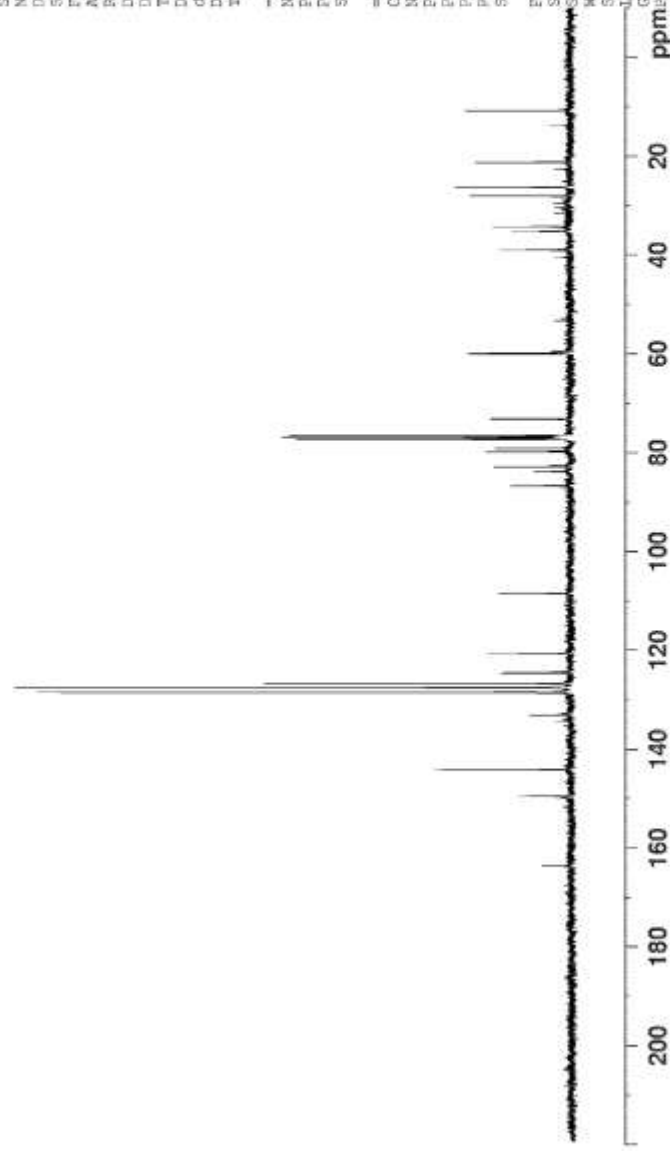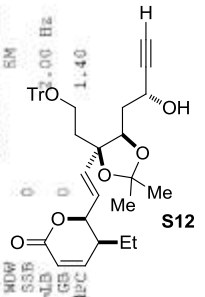

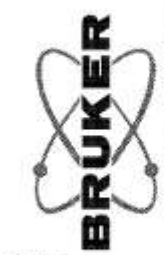

Current Data Parameters  
 NAME 22F5H  
 EXPNO 1  
 PROCNO 1

F2 - Acquisition Parameters  
 Date\_ 20100610  
 Time 17.33  
 INSTRUM spect  
 PROBRD 5 mm QNP 1H/1  
 PULPROG zg30  
 TD 32768  
 SOLVENT CDCl3  
 NS 16  
 DS 0  
 SWH 6218.905 Hz  
 FIDRES 0.189786 Hz  
 AQ 2.6345973 sec  
 RG 57  
 DW 80.400 usec  
 DE 6.00 usec  
 TE 300.0 K  
 D1 1.00000000 sec  
 TDO 1

===== CHANNEL f1 =====  
 NUC1 1H  
 P1 9.30 usec  
 PL1 -3.00 dB  
 SFO1 399.7824920 MHz  
 F2 - Processing parameters  
 SI 32768  
 SF 399.7800000 MHz  
 WDW EM  
 SSB 0  
 LB 0.30 Hz  
 GB 0  
 PC 1.00

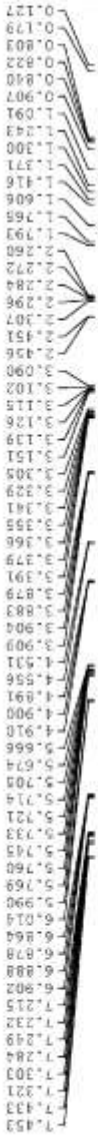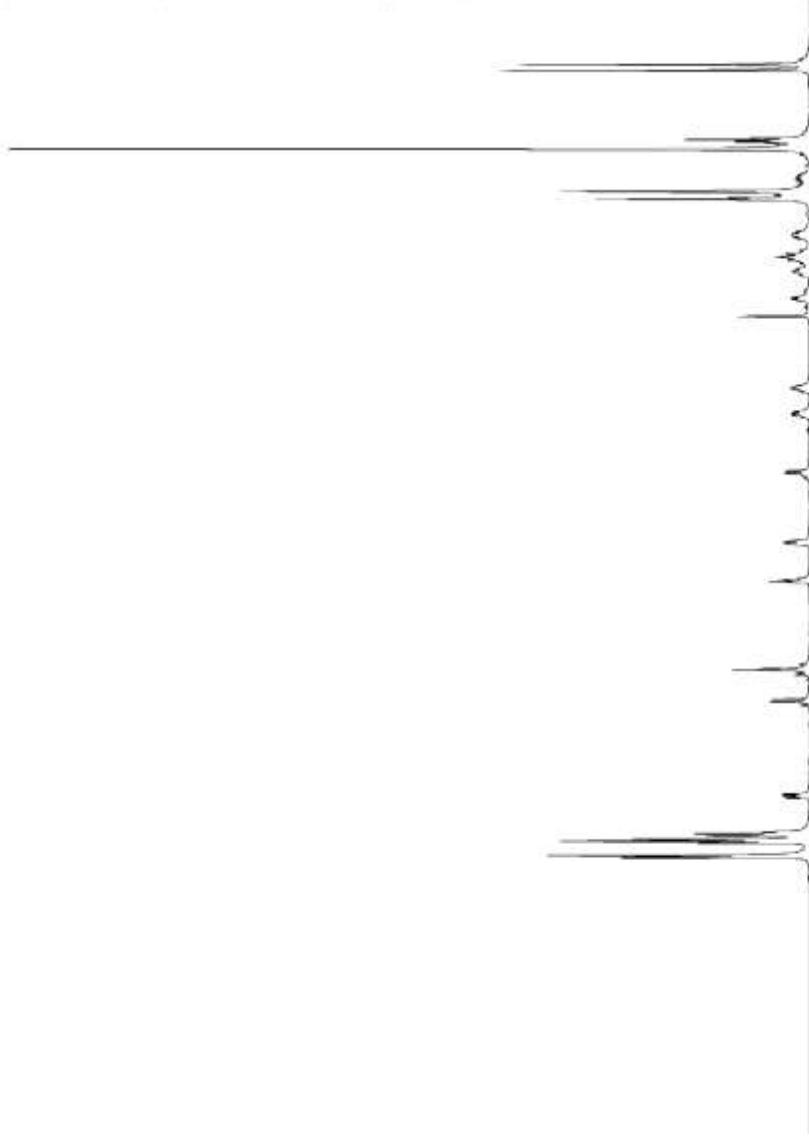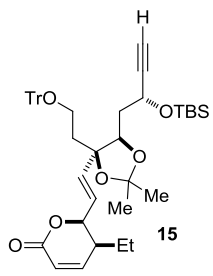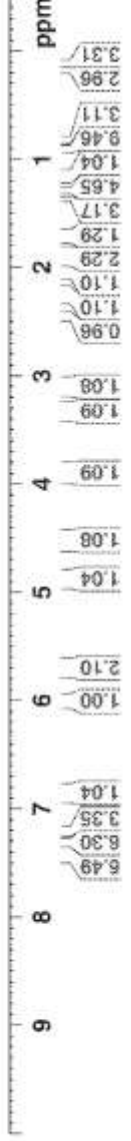



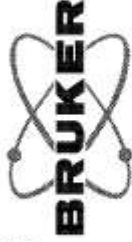

Current Data Parameters  
 NAME 22F5C  
 EXPNO 1  
 PROCNO 1

F2 - Acquisition Parameters

Date\_ 20100610  
 Time 17.39  
 INSTRUM spect  
 PROBRD 5 mm QNP 1H/1  
 PULPROG zgpg30  
 TD 32768  
 SOLVENT CDCl3  
 NS 620  
 DS 0  
 SWH 23980.814 Hz  
 FIDRES 0.731836 Hz  
 AQ 0.6832628 sec  
 RG 16384  
 DW 20.850 usec  
 DE 6.00 usec  
 TE 300.0 K  
 D1 1.00000000 sec  
 d11 0.03000000 sec  
 DELTA 0.89999998 sec  
 TD0 1

===== CHANNEL f1 =====  
 NUC1 13C  
 P1 7.25 usec  
 PL1 0 dB  
 SFO1 100.5348134 MHz

===== CHANNEL f2 =====  
 CSDEPRG2 waltz16  
 NUC2 1H  
 EPCPD2 90.00 usec  
 PL2 -3.00 dB  
 PL12 16.72 dB  
 PL13 20.00 dB  
 SFO2 399.7815991 MHz

F2 - Processing parameters  
 SI 32768  
 SF 100.5247659 MHz  
 NQW EM

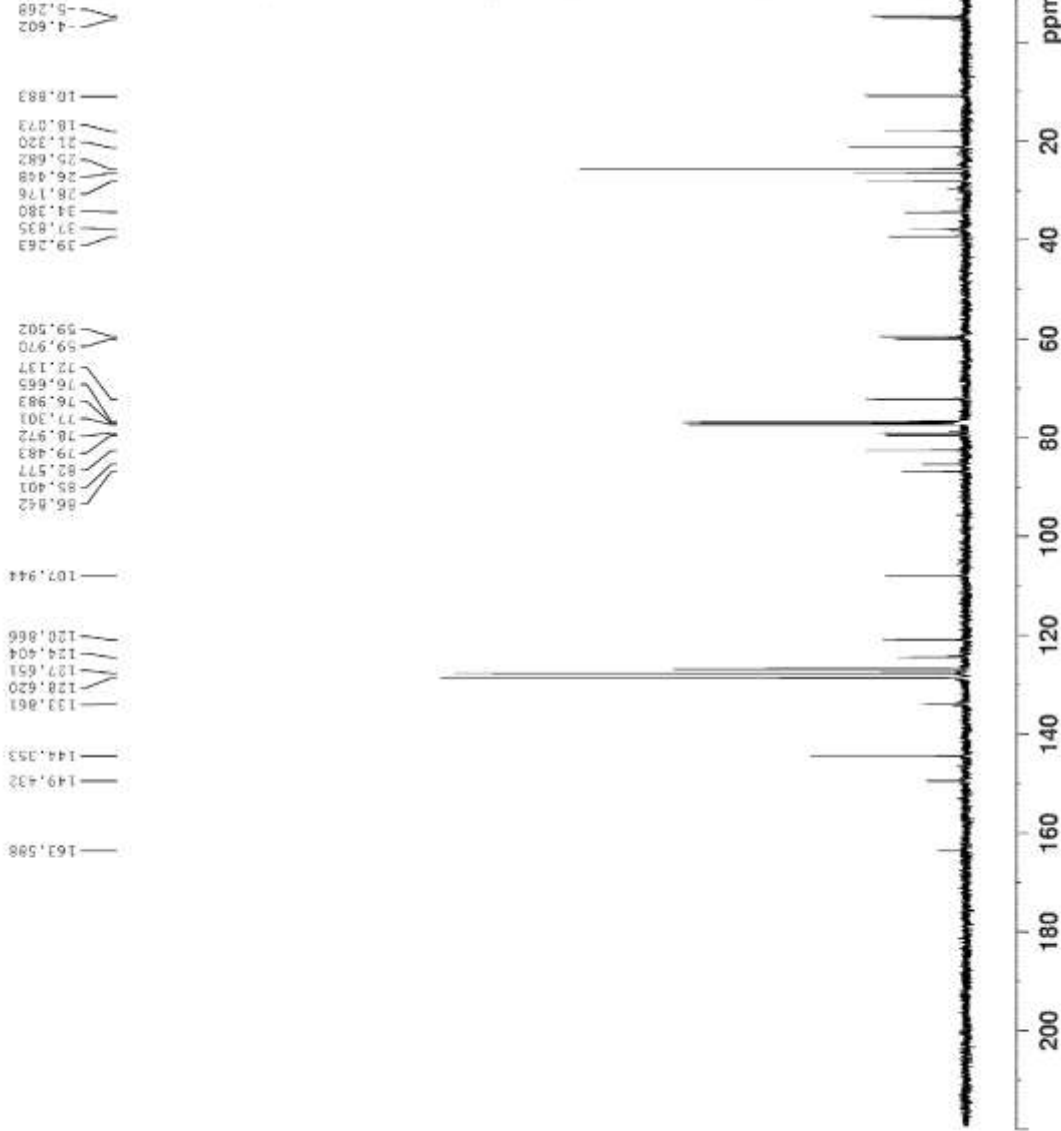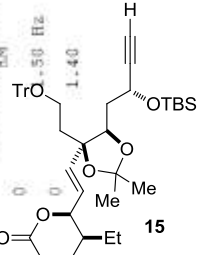

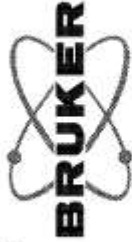

Current Data Parameters  
NAME 23F6H  
EXPNO 1  
PROCNO 1

F2 - Acquisition Parameters  
Date\_ 20100615  
Time 11:34  
INSTRUM spect  
PROBHD 5 mm QNP 1H/1  
PULPROG zg30  
TD 32768  
SOLVENT CDCl3  
NS 8  
DS 0  
SWH 6218.905 Hz  
FIDRES 0.189786 Hz  
AQ 2.6345973 sec  
RG 57  
DW 80.400 usec  
DE 6.00 usec  
TE 300.0 K  
TD0 1.00000000 sec  
TD0 1

===== CHANNEL f1 =====  
NUC1 1H  
P1 9.30 usec  
PL1 -3.00 dB  
SFO1 399.7824920 MHz  
F2 - Processing parameters  
SI 32768  
SF 399.7800080 MHz  
WDW EM  
SSB 0  
LB 0.30 Hz  
GB 0  
PC 1.00

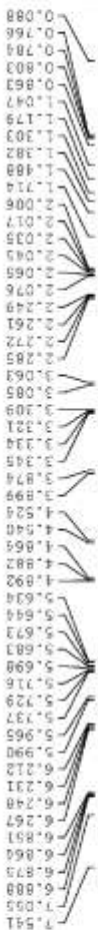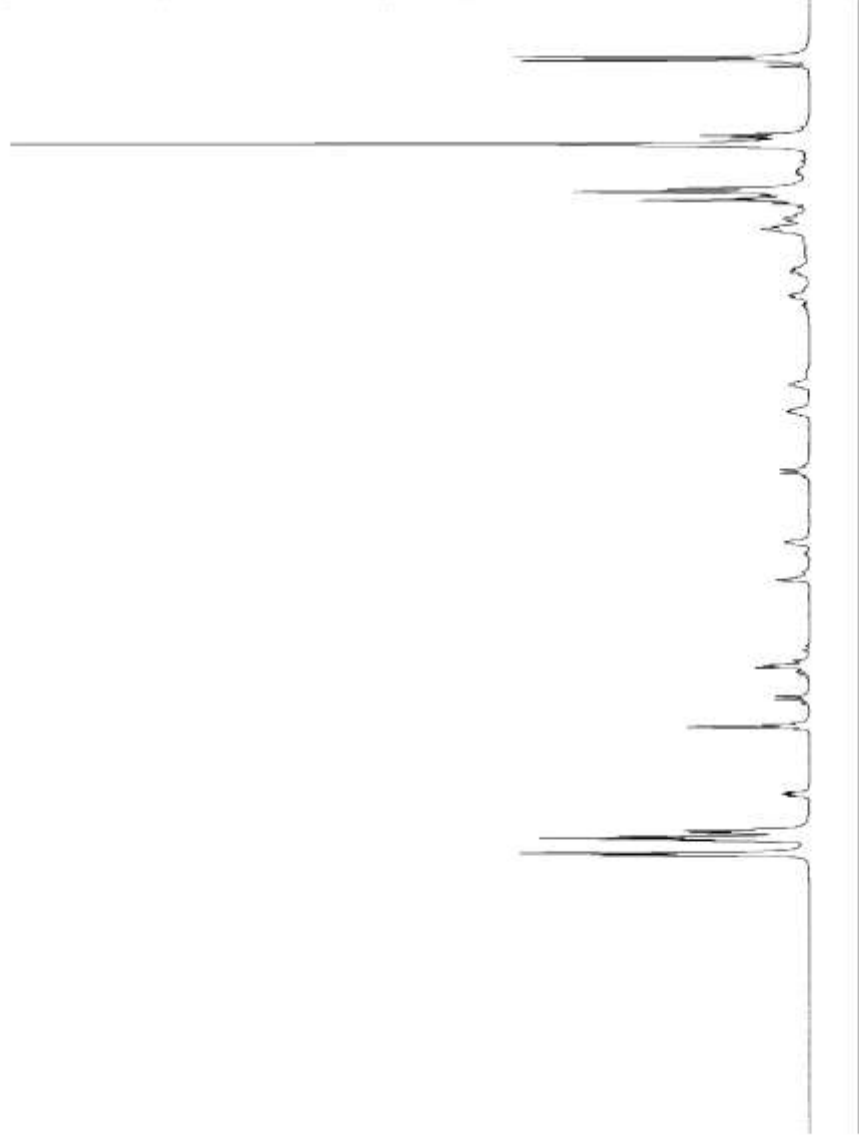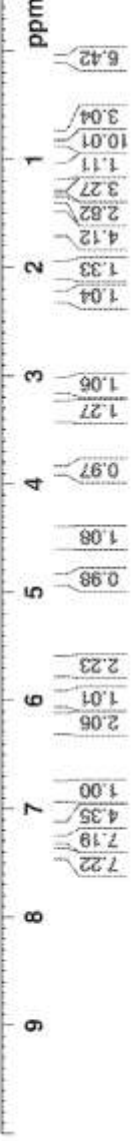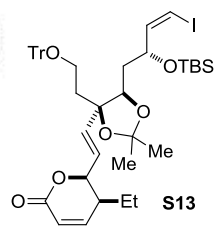

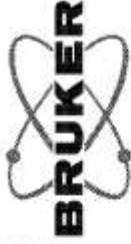

Current Data Parameters  
NAME 23f6C  
EXPRD 1  
PROCNO 1

F2 - Acquisition Parameters

Date 20100615  
Time 11:39  
INSTRUM spect  
PROBRD 5 mm QNP 1H/1  
PULPROG zgpg30  
TD 32768  
SOLVENT CDCl3  
NS 512  
DS 0  
SWH 23980.814 Hz  
FIDRES 0.731836 Hz  
AQ 0.6833628 sec  
RG 16384  
DW 20.850 usec  
DE 6.00 usec  
TE 300.0 K  
D1 1.00000000 sec  
d11 0.03000000 sec  
DELTA 0.89999998 sec  
TD0 1

===== CHANNEL f1 =====  
NUC1 13C  
P1 7.25 usec  
PL1 0 dB  
SFO1 100.5348134 MHz

===== CHANNEL f2 =====  
CSPRG2 waltz16  
NUC2 1H  
PCPD2 90.00 usec  
PL2 -3.00 dB  
PL12 16.72 dB  
PL13 20.00 dB  
SFO2 399.7815991 MHz

F2 - Processing parameters  
SI 32768  
SF 100.5247673 MHz  
WDW EM

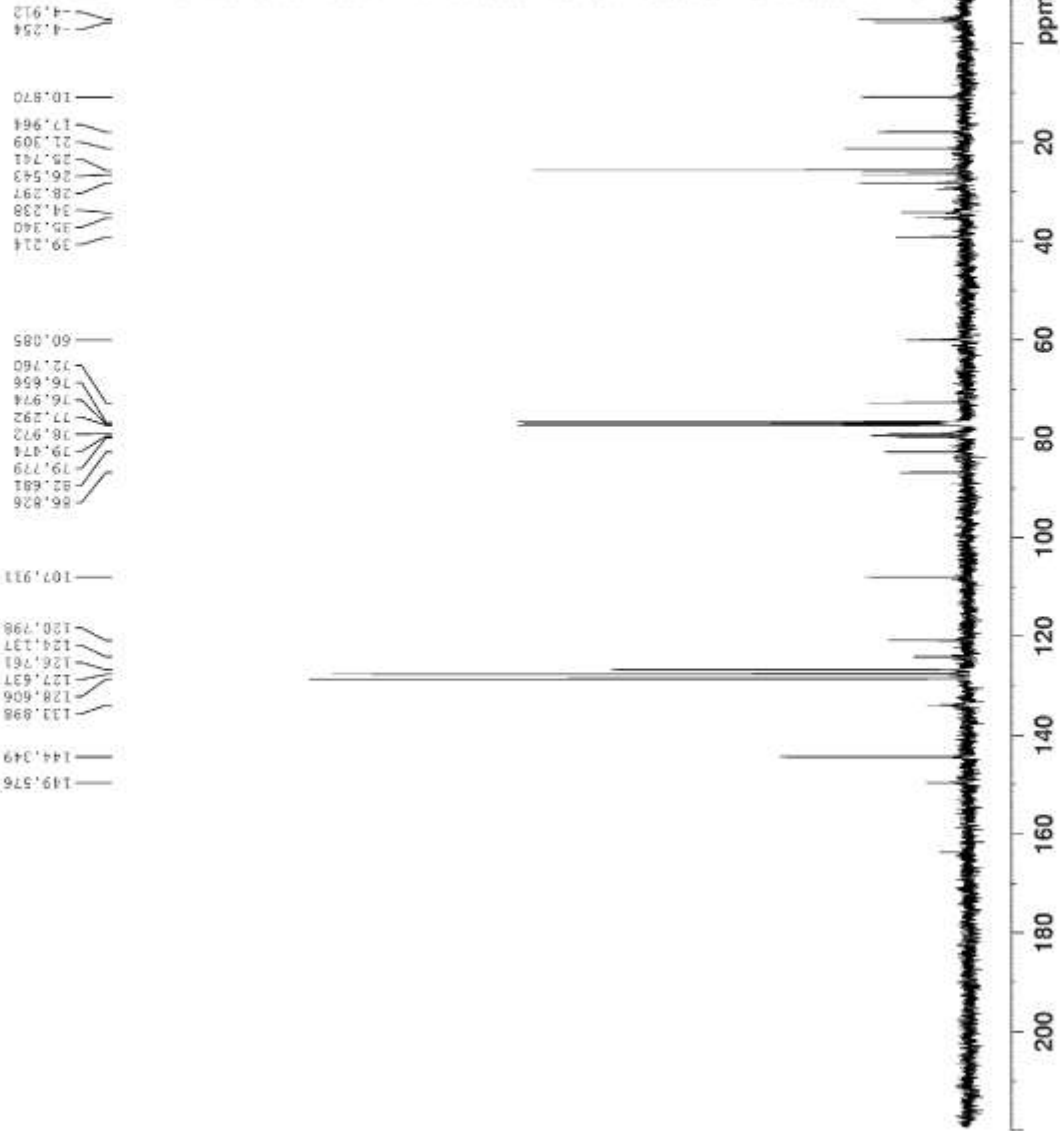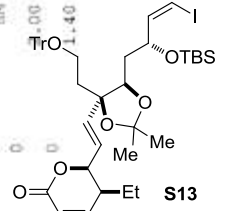

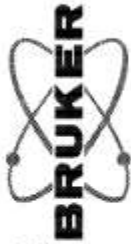

Current Data Parameters  
NAME SNGXIV-Imanishi  
EXPNO 2  
PROCNO 1

F2 - Acquisition Parameters

Date\_ 20100708  
Time 15.42  
INSTRUM spect  
PROBHD 5 mm TWD 13C/3  
PULPROG zg30  
TD 32768  
SOLVENT CDCl3  
NS 32  
DS 0  
SWH 4237.288 Hz  
FIDRES 0.129312 Hz  
AQ 3.8666733 sec  
RG 4036  
DW 116.000 usec  
DE 168.57 usec  
TE 293.0 K  
HL1 1 dB  
D1 1.0000000 sec  
P1 11.25 usec  
SFO1 300.1319000 MHz  
NUCLEUS 1H

F2 - Processing parameters  
SI 16384  
SF 300.1300061 MHz  
WDW EM  
SSB 0  
LB 0.30 Hz  
GB 0  
PC 1.00

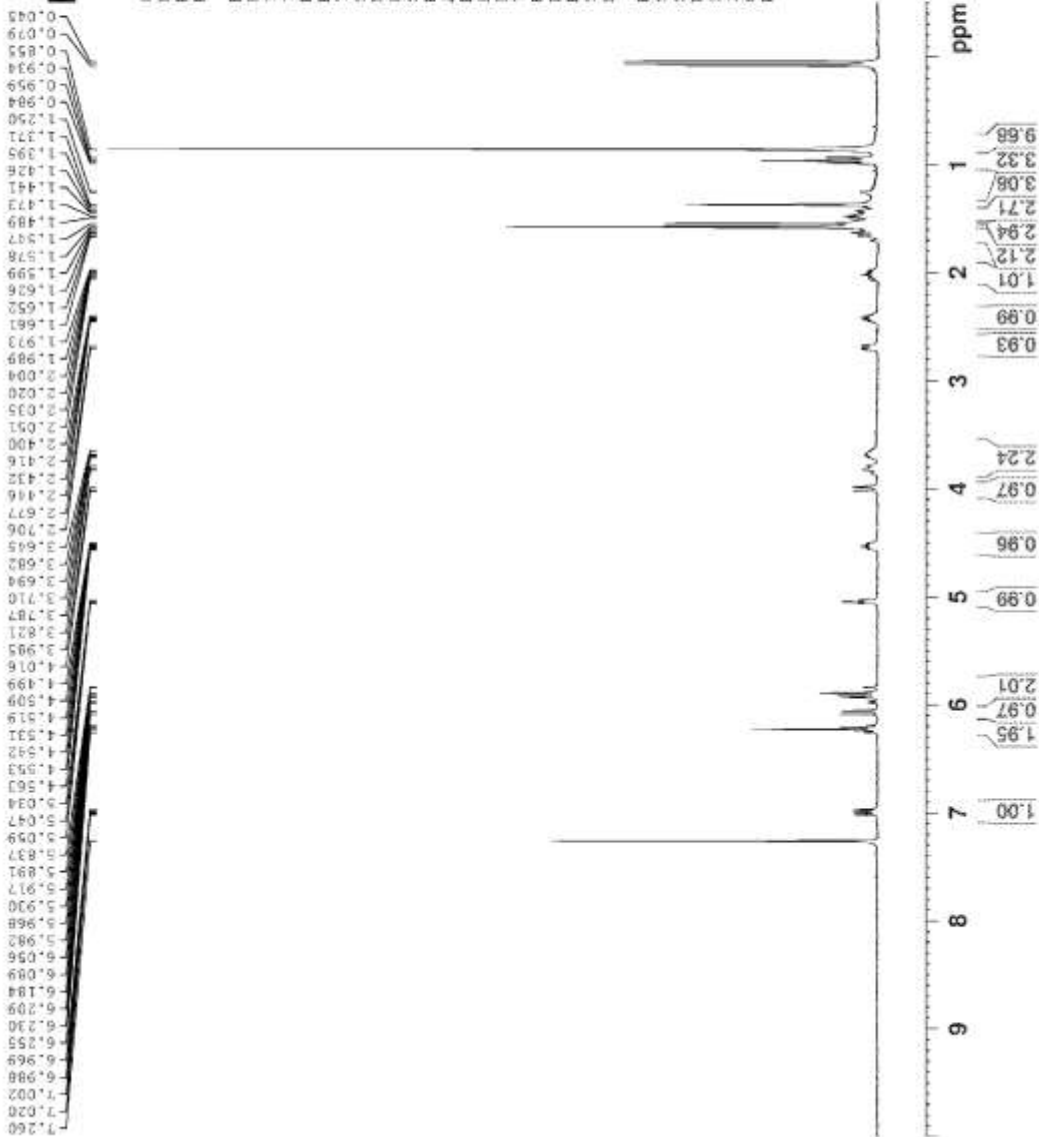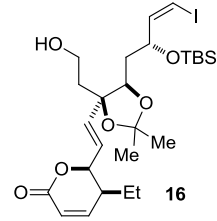

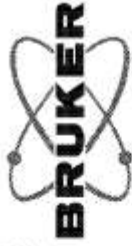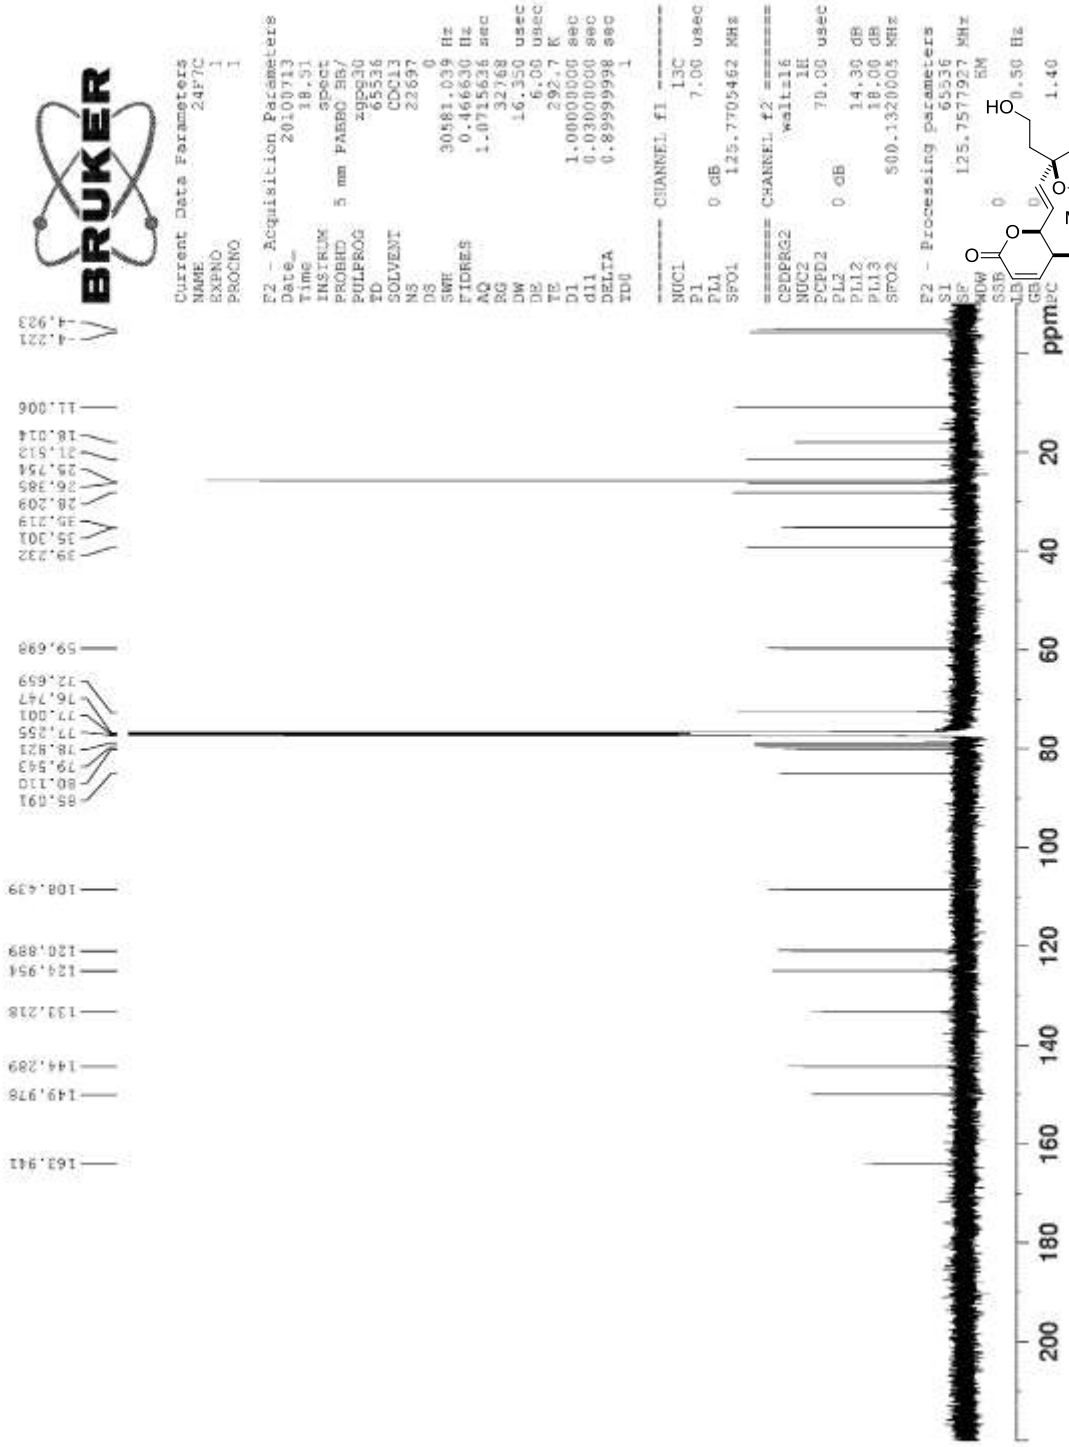

Supplement: NIHMS297545-supplement-1_si_001.pdf [file NIHMS297545-supplement-1_si_001.pdf]
